# Supplementary material for: Preclinical Characterization of GLS-010 (Zimberelimab), a Novel Fully Human Anti-PD-1 Therapeutic Monoclonal Antibody for Cancer
Source: PubMed Central journal article supplement (PMC8479189; doi:10.3389/fonc.2021.736955), 2021-09-15
Supplement: DataSheet_1.pdf [file DataSheet_1.pdf]

Appendix 7

Individual Hematology

## Appendix 7 Individual Hematology

Key Page**Measurement Descriptions**

| <u>Headings Used</u> | <u>Description</u>                |
|----------------------|-----------------------------------|
| WBC                  | Leukocyte count                   |
| RBC                  | Erythrocyte count                 |
| HGB                  | Hemoglobin                        |
| HCT                  | Hematocrit                        |
| MCV                  | Mean Corpuscular Volume           |
| MCH                  | Mean Corpuscular Hemoglobin       |
| MCHC                 | Mean Corpuscular Hemoglobin Conc. |
| RDW                  | RBC Distribution Width            |
| #RET                 | Reticulocytes, absolute           |
| #NEUT                | Neutrophils, absolute             |
| %NEUT                | Neutrophils, percent              |
| #LYMP                | Lymphocytes, absolute             |
| %LYMP                | Lymphocytes, percent              |
| #MONO                | Monocytes, absolute               |
| %MONO                | Monocytes, percent                |
| #EOS                 | Eosinophils, absolute             |
| %EOS                 | Eosinophils, percent              |
| #BASO                | Basophils, absolute               |
| %BASO                | Basophils, percent                |
| PLT                  | Platelet Count                    |
| MPV                  | Mean Platelet Volume              |

## Appendix 7 Individual Hematology (Cont'd)

Sex: Male

| 1<br>0<br>mg/kg | WBC                    | WBC                    | WBC                    | RBC                    | RBC                    | RBC                    | HGB    | HGB    | HGB    | HCT  | HCT  | HCT  |
|-----------------|------------------------|------------------------|------------------------|------------------------|------------------------|------------------------|--------|--------|--------|------|------|------|
|                 | (x10 <sup>9</sup> /μL) | (x10 <sup>9</sup> /μL) | (x10 <sup>9</sup> /μL) | (x10 <sup>6</sup> /μL) | (x10 <sup>6</sup> /μL) | (x10 <sup>6</sup> /μL) | (g/dL) | (g/dL) | (g/dL) | (%)  | (%)  | (%)  |
|                 | -7                     | 2                      | 15                     | -7                     | 2                      | 15                     | -7     | 2      | 15     | -7   | 2    | 15   |
| 1001            | 6.29                   | 9.88                   | 3.94                   | 5.85                   | 6.11                   | 5.80                   | 12.2   | 12.5   | 11.6   | 42.1 | 42.9 | 41.0 |

Appendix 7 Individual Hematology (Cont'd)

Sex: Male

| 1<br>0<br>mg/kg | MCV  | MCV  | MCV  | MCH  | MCH  | MCH  | MCHC   | MCHC   | MCHC   | RDW  | RDW  | RDW  |
|-----------------|------|------|------|------|------|------|--------|--------|--------|------|------|------|
|                 | (fL) | (fL) | (fL) | (pg) | (pg) | (pg) | (g/dL) | (g/dL) | (g/dL) | (%)  | (%)  | (%)  |
|                 | -7   | 2    | 15   | -7   | 2    | 15   | -7     | 2      | 15     | -7   | 2    | 15   |
| 1001            | 71.8 | 70.2 | 70.7 | 20.8 | 20.5 | 20.0 | 29.0   | 29.2   | 28.3   | 13.8 | 13.8 | 13.7 |

Appendix 7 Individual Hematology (Cont'd)

Sex: Male

| 1     | #RET                  | #RET                  | #RET                  | #RET                  | #NEUT                  | #NEUT                  | #NEUT                  | %NEUT | %NEUT | #LYMP                  | #LYMP                  | #LYMP                  |
|-------|-----------------------|-----------------------|-----------------------|-----------------------|------------------------|------------------------|------------------------|-------|-------|------------------------|------------------------|------------------------|
| 0     | (x10 <sup>9</sup> /L) | (x10 <sup>9</sup> /L) | (x10 <sup>9</sup> /L) | (x10 <sup>9</sup> /L) | (x10 <sup>9</sup> /μL) | (x10 <sup>9</sup> /μL) | (x10 <sup>9</sup> /μL) | (%)   | (%)   | (x10 <sup>9</sup> /μL) | (x10 <sup>9</sup> /μL) | (x10 <sup>9</sup> /μL) |
| mg/kg | -7                    | 2                     | 15                    | -7                    | 2                      | 15                     | -7                     | 2     | 15    | -7                     | 2                      | 15                     |
|       | 69.4                  | 54.7                  | 78.5                  | 3.11                  | 6.27                   | 1.06                   | 49.5                   | 63.5  | 26.9  | 2.76                   | 3.31                   | 2.57                   |

Appendix 7 Individual Hematology (Cont'd)

Sex: Male

| 1     | %LYMP | %LYMP | %LYMP | #MONO                  | #MONO                  | #MONO                  | %MONO | %MONO | #EOS                   | #EOS                   | #EOS                   |
|-------|-------|-------|-------|------------------------|------------------------|------------------------|-------|-------|------------------------|------------------------|------------------------|
| 0     | (%)   | (%)   | (%)   | (x10 <sup>3</sup> /µL) | (x10 <sup>3</sup> /µL) | (x10 <sup>3</sup> /µL) | (%)   | (%)   | (x10 <sup>3</sup> /µL) | (x10 <sup>3</sup> /µL) | (x10 <sup>3</sup> /µL) |
| mg/kg | -7    | 2     | 15    | -7                     | 2                      | 15                     | -7    | 2     | -7                     | 2                      | 15                     |
|       | 43.8  | 33.4  | 65.1  | 0.35                   | 0.22                   | 0.24                   | 5.6   | 2.3   | 0.01                   | 0.02                   | 0.01                   |

Appendix 7 Individual Hematology (Cont'd)

Sex: Male

| 1     | %EOS | %EOS | %EOS | #BASO                  | #BASO                  | #BASO                  | %BASO | %BASO | %BASO | PLT                    | PLT                    | PLT                    |
|-------|------|------|------|------------------------|------------------------|------------------------|-------|-------|-------|------------------------|------------------------|------------------------|
| 0     | (%)  | (%)  | (%)  | (x10 <sup>3</sup> /µL) | (x10 <sup>3</sup> /µL) | (x10 <sup>3</sup> /µL) | (%)   | (%)   | (%)   | (x10 <sup>3</sup> /µL) | (x10 <sup>3</sup> /µL) | (x10 <sup>3</sup> /µL) |
| mg/kg | -7   | 2    | 15   | -7                     | 2                      | 15                     | -7    | 2     | 15    | -7                     | 2                      | 15                     |
|       | 0.1  | 0.2  | 0.3  | 0.01                   | 0.01                   | 0.01                   | 0.1   | 0.1   | 0.3   | 301                    | 356                    | 334                    |

Appendix 7 Individual Hematology (Cont'd)

| Sex: Male |      | MPV  | MPV  | MPV  |
|-----------|------|------|------|------|
| 1         |      |      |      |      |
| 0         |      |      |      |      |
| mg/kg     |      | (fL) | (fL) | (fL) |
|           |      | -7   | 2    | 15   |
|           | 1001 | 8.4  | 8.1  | 7.8  |



Appendix 7 Individual Hematology (Cont'd)

Sex: Male

| 2001                   | 7.16                   | 9.41                   | 4.29                   | 5.66                   | 5.52                   | 5.24                   | 13.8   | 13.4   | 12.6   | 42.6 | 41.9 | 39.3 |
|------------------------|------------------------|------------------------|------------------------|------------------------|------------------------|------------------------|--------|--------|--------|------|------|------|
| (x10 <sup>3</sup> /μL) | (x10 <sup>3</sup> /μL) | (x10 <sup>3</sup> /μL) | (x10 <sup>3</sup> /μL) | (x10 <sup>6</sup> /μL) | (x10 <sup>6</sup> /μL) | (x10 <sup>6</sup> /μL) | (g/dL) | (g/dL) | (g/dL) | (%)  | (%)  | (%)  |
| WBC                    | WBC                    | WBC                    | WBC                    | RBC                    | RBC                    | RBC                    | HGB    | HGB    | HGB    | HCT  | HCT  | HCT  |
| -7                     | 2                      | 15                     | -7                     | 2                      | 15                     | -7                     | 15     | 2      | 15     | -7   | 2    | 15   |
| 7.16                   | 9.41                   | 4.29                   | 5.66                   | 5.52                   | 5.24                   | 13.8                   | 13.4   | 12.6   | 42.6   | 41.9 | 39.3 |      |

Appendix 7 Individual Hematology (Cont'd)

Sex: Male

| 2001 | MCV  |      | MCV  |      | MCH  |      | MCHC   |        | MCHC   |        | RDW  |      |
|------|------|------|------|------|------|------|--------|--------|--------|--------|------|------|
|      | (fL) | (fL) | (fL) | (fL) | (pg) | (pg) | (g/dL) | (g/dL) | (g/dL) | (g/dL) | (%)  | (%)  |
|      | -7   | 2    | 15   | -7   | 2    | 15   | -7     | 2      | 15     | -7     | 2    | 15   |
|      | 75.3 | 76.0 | 75.0 | 24.4 | 24.3 | 24.1 | 32.4   | 32.0   | 32.1   | 12.6   | 12.6 | 12.5 |

Appendix 7 Individual Hematology (Cont'd)

Sex: Male

| 2001                          | 62.8                          | 114.2                         | 81.3                          | 4.30                            | 7.22                            | 1.76                            | 60.0         | 76.7         | 40.9         | 2.53                            | 1.96                            | 2.32                            |
|-------------------------------|-------------------------------|-------------------------------|-------------------------------|---------------------------------|---------------------------------|---------------------------------|--------------|--------------|--------------|---------------------------------|---------------------------------|---------------------------------|
| #RET<br>(x10 <sup>9</sup> /L) | #RET<br>(x10 <sup>9</sup> /L) | #RET<br>(x10 <sup>9</sup> /L) | #RET<br>(x10 <sup>9</sup> /L) | #NEUT<br>(x10 <sup>9</sup> /µL) | #NEUT<br>(x10 <sup>9</sup> /µL) | #NEUT<br>(x10 <sup>9</sup> /µL) | %NEUT<br>(%) | %NEUT<br>(%) | %NEUT<br>(%) | #LYMP<br>(x10 <sup>9</sup> /µL) | #LYMP<br>(x10 <sup>9</sup> /µL) | #LYMP<br>(x10 <sup>9</sup> /µL) |
| -7                            | 2                             | 15                            | -7                            | 2                               | 15                              | -7                              | 2            | 2            | 15           | -7                              | 2                               | 15                              |
| 62.8                          | 114.2                         | 81.3                          | 4.30                          | 7.22                            | 1.76                            | 60.0                            | 76.7         | 40.9         | 2.53         | 1.96                            | 2.32                            |                                 |

Appendix 7 Individual Hematology (Cont'd)

Sex: Male

| 2001 | %LYMP<br>(%) | %LYMP<br>(%) | %LYMP<br>(%) | #MONO<br>(x10 <sup>3</sup> /µL) | #MONO<br>(x10 <sup>3</sup> /µL) | #MONO<br>(x10 <sup>3</sup> /µL) | %MONO<br>(%) | %MONO<br>(%) | #EOS<br>(x10 <sup>3</sup> /µL) | #EOS<br>(x10 <sup>3</sup> /µL) | #EOS<br>(x10 <sup>3</sup> /µL) |
|------|--------------|--------------|--------------|---------------------------------|---------------------------------|---------------------------------|--------------|--------------|--------------------------------|--------------------------------|--------------------------------|
| 2001 | -7           | 2            | 15           | -7                              | 2                               | 15                              | -7           | 2            | -7                             | 2                              | 15                             |
| 2001 | 35.3         | 20.9         | 53.9         | 0.25                            | 0.17                            | 0.15                            | 3.5          | 1.8          | 0.03                           | 0.04                           | 0.02                           |

Appendix 7 Individual Hematology (Cont'd)

Sex: Male

| 2     | %EOS | %EOS | %EOS | #BASO                  | #BASO                  | #BASO                  | %BASO | %BASO | %BASO | PLT                    | PLT                    | PLT                    |
|-------|------|------|------|------------------------|------------------------|------------------------|-------|-------|-------|------------------------|------------------------|------------------------|
| mg/kg | (%)  | (%)  | (%)  | (x10 <sup>3</sup> /µL) | (x10 <sup>3</sup> /µL) | (x10 <sup>3</sup> /µL) | (%)   | (%)   | (%)   | (x10 <sup>3</sup> /µL) | (x10 <sup>3</sup> /µL) | (x10 <sup>3</sup> /µL) |
|       | -7   | 2    | 15   | -7                     | 2                      | 15                     | -7    | 2     | 15    | -7                     | 2                      | 15                     |
| 2001  | 0.4  | 0.4  | 0.6  | 0.02                   | 0.00                   | 0.01                   | 0.2   | 0.0   | 0.3   | 246                    | 271                    | 268                    |

Appendix 7 Individual Hematology (Cont'd)

| Sex: Male |  | MPV  | MPV  | MPV  |
|-----------|--|------|------|------|
| 2         |  |      |      |      |
| 100       |  |      |      |      |
| mg/kg     |  | (fL) | (fL) | (fL) |
|           |  | -7   | 2    | 15   |
| 2001      |  | 9.1  | 8.5  | 8.4  |

Appendix 7 Individual Hematology (Cont'd)

Sex: Male

| 300 mg/kg | WBC<br>(x10 <sup>3</sup> /µL) | WBC<br>(x10 <sup>3</sup> /µL) | WBC<br>(x10 <sup>3</sup> /µL) | RBC<br>(x10 <sup>6</sup> /µL) | RBC<br>(x10 <sup>6</sup> /µL) | RBC<br>(x10 <sup>6</sup> /µL) | HGB<br>(g/dL) | HGB<br>(g/dL) | HGB<br>(g/dL) | HCT<br>(%) | HCT<br>(%) | HCT<br>(%) |
|-----------|-------------------------------|-------------------------------|-------------------------------|-------------------------------|-------------------------------|-------------------------------|---------------|---------------|---------------|------------|------------|------------|
|           | -7                            | 2                             | 15                            | -7                            | 2                             | 15                            | -7            | 2             | 15            | -7         | 2          | 15         |
| 3001      | 12.25                         | 5.93                          | 4.88                          | 5.24                          | 5.22                          | 5.19                          | 12.7          | 12.5          | 12.4          | 39.8       | 39.6       | 38.6       |

Appendix 7 Individual Hematology (Cont'd)

Sex: Male

| 300 mg/kg | MCV (fL) | MCV (fL) | MCV (fL) | MCH (pg) | MCH (pg) | MCH (pg) | MCHC (g/dL) | MCHC (g/dL) | MCHC (g/dL) | RDW (%) | RDW (%) | RDW (%) |
|-----------|----------|----------|----------|----------|----------|----------|-------------|-------------|-------------|---------|---------|---------|
|           | -7       | 2        | 15       | -7       | 24.2     | 24.0     | 31.8        | 31.7        | 32.2        | -7      | 13.8    | 13.8    |
| 3001      | 76.0     | 75.9     | 74.5     | 24.2     | 24.0     | 24.0     | 31.8        | 31.7        | 32.2        | 13.8    | 13.8    | 13.6    |



Appendix 7 Individual Hematology (Cont'd)

Sex: Male

|           | #RET                  | #RET                  | #RET                  | #RET                  | #NEUT                  | #NEUT                  | #NEUT                  | #NEUT                  | %NEUT | %NEUT | #LYMP                  | #LYMP                  | #LYMP                  |
|-----------|-----------------------|-----------------------|-----------------------|-----------------------|------------------------|------------------------|------------------------|------------------------|-------|-------|------------------------|------------------------|------------------------|
|           | (x10 <sup>9</sup> /L) | (x10 <sup>9</sup> /L) | (x10 <sup>9</sup> /L) | (x10 <sup>9</sup> /L) | (x10 <sup>9</sup> /μL) | (x10 <sup>9</sup> /μL) | (x10 <sup>9</sup> /μL) | (x10 <sup>9</sup> /μL) | (%)   | (%)   | (x10 <sup>9</sup> /μL) | (x10 <sup>9</sup> /μL) | (x10 <sup>9</sup> /μL) |
| 3         | -7                    | 2                     | 15                    | 62.6                  | -7                     | 2                      | 15                     | -7                     | 2     | 15    | -7                     | 2                      | 15                     |
| 300 mg/kg | 52.6                  | 55.9                  | 62.6                  | 3.94                  | 9.89                   | 1.77                   | 80.7                   | 66.5                   | 36.4  | 2.13  | 1.72                   | 2.90                   |                        |

Appendix 7 Individual Hematology (Cont'd)

Sex: Male

| 300 mg/kg | %LYMP | %LYMP | %LYMP | #MONO                  | #MONO                  | #MONO                  | %MONO | %MONO | #EOS                   | #EOS                   | #EOS                   |
|-----------|-------|-------|-------|------------------------|------------------------|------------------------|-------|-------|------------------------|------------------------|------------------------|
|           | (%)   | (%)   | (%)   | (x10 <sup>3</sup> /µL) | (x10 <sup>3</sup> /µL) | (x10 <sup>3</sup> /µL) | (%)   | (%)   | (x10 <sup>3</sup> /µL) | (x10 <sup>3</sup> /µL) | (x10 <sup>3</sup> /µL) |
|           | -7    | 2     | 15    | -7                     | 2                      | 15                     | -7    | 15    | -7                     | 2                      | 15                     |
| 3001      | 17.4  | 29.1  | 59.4  | 0.20                   | 0.21                   | 0.15                   | 1.6   | 3.5   | 0.00                   | 0.01                   | 0.02                   |

Appendix 7 Individual Hematology (Cont'd)

Sex: Male

|           | %EOS | %EOS | %EOS | #BASO                  | #BASO                  | #BASO                  | %BASO | %BASO | %BASO | PLT                    | PLT                    | PLT                    |
|-----------|------|------|------|------------------------|------------------------|------------------------|-------|-------|-------|------------------------|------------------------|------------------------|
|           | (%)  | (%)  | (%)  | (x10 <sup>3</sup> /µL) | (x10 <sup>3</sup> /µL) | (x10 <sup>3</sup> /µL) | (%)   | (%)   | (%)   | (x10 <sup>3</sup> /µL) | (x10 <sup>3</sup> /µL) | (x10 <sup>3</sup> /µL) |
| 3         | -7   | 2    | 15   | -7                     | 2                      | 15                     | -7    | 2     | 15    | -7                     | 2                      | 15                     |
| 300 mg/kg | 0.0  | 0.2  | 0.3  | 0.01                   | 0.01                   | 0.01                   | 0.1   | 0.1   | 0.2   | 404                    | 445                    | 437                    |

Appendix 7 Individual Hematology (Cont'd)

| Sex: Male |  | MPV  | MPV  | MPV  |
|-----------|--|------|------|------|
| 3         |  |      |      |      |
| 300       |  |      |      |      |
| mg/kg     |  | (fL) | (fL) | (fL) |
|           |  | -7   | 2    | 15   |
| 3001      |  | 7.2  | 7.3  | 7.0  |

Appendix 7 Individual Hematology (Cont'd)

Sex: Male

| 4     | WBC                    | WBC                    | WBC                    | RBC                    | RBC                    | RBC                    | HGB    | HGB    | HGB    | HCT  | HCT  | HCT  |
|-------|------------------------|------------------------|------------------------|------------------------|------------------------|------------------------|--------|--------|--------|------|------|------|
| 1000  | (x10 <sup>3</sup> /µL) | (x10 <sup>3</sup> /µL) | (x10 <sup>3</sup> /µL) | (x10 <sup>6</sup> /µL) | (x10 <sup>6</sup> /µL) | (x10 <sup>6</sup> /µL) | (g/dL) | (g/dL) | (g/dL) | (%)  | (%)  | (%)  |
| mg/kg | -7                     | 2                      | 15                     | -7                     | 2                      | 15                     | -7     | 2      | 15     | -7   | 2    | 15   |
|       | 8.23                   | 3.55                   | 3.03                   | 5.57                   | 5.33                   | 5.40                   | 13.0   | 12.5   | 12.6   | 41.7 | 41.0 | 42.1 |

Appendix 7 Individual Hematology (Cont'd)

Sex: Male

| 4     | MCV  | MCV  | MCV  | MCV  | MCH  | MCH  | MCHC   | MCHC   | MCHC   | RDW  | RDW  | RDW  |
|-------|------|------|------|------|------|------|--------|--------|--------|------|------|------|
| 1000  | (fL) | (fL) | (fL) | (fL) | (pg) | (pg) | (g/dL) | (g/dL) | (g/dL) | (%)  | (%)  | (%)  |
| mg/kg | -7   | 2    | 15   | -7   | 2    | 15   | -7     | 2      | 15     | -7   | 2    | 15   |
|       | 74.9 | 76.9 | 78.1 | 23.4 | 23.5 | 23.3 | 31.2   | 30.5   | 29.9   | 14.4 | 15.2 | 15.2 |

Appendix 7 Individual Hematology (Cont'd)

Sex: Male

| 4          | #RET                  | #RET                  | #RET                  | #RET                  | #NEUT                  | #NEUT                  | #NEUT                  | #NEUT                  | %NEUT | %NEUT | %NEUT | #LYMP                  | #LYMP                  | #LYMP                  |
|------------|-----------------------|-----------------------|-----------------------|-----------------------|------------------------|------------------------|------------------------|------------------------|-------|-------|-------|------------------------|------------------------|------------------------|
|            | (x10 <sup>9</sup> /L) | (x10 <sup>9</sup> /L) | (x10 <sup>9</sup> /L) | (x10 <sup>9</sup> /L) | (x10 <sup>9</sup> /μL) | (x10 <sup>9</sup> /μL) | (x10 <sup>9</sup> /μL) | (x10 <sup>9</sup> /μL) | (%)   | (%)   | (%)   | (x10 <sup>9</sup> /μL) | (x10 <sup>9</sup> /μL) | (x10 <sup>9</sup> /μL) |
| 1000 mg/kg | -7                    | 2                     | 15                    | 53.8                  | -7                     | 2                      | 15                     | 15                     | 2     | 15    | -7    | 2                      | 2                      | 15                     |
| 4001       | 32.8                  | 38.8                  | 53.8                  | 6.20                  | 1.51                   | 0.54                   | 75.3                   | 42.5                   | 17.9  | 1.89  | 1.90  | 2.35                   |                        |                        |

Appendix 7 Individual Hematology (Cont'd)

Sex: Male

| 4    |       | %LYMP | %LYMP | %LYMP | #MONO                  | #MONO                  | #MONO                  | %MONO | %MONO | #EOS                   | #EOS                   | #EOS                   |
|------|-------|-------|-------|-------|------------------------|------------------------|------------------------|-------|-------|------------------------|------------------------|------------------------|
| 1000 | mg/kg | (%)   | (%)   | (%)   | (x10 <sup>3</sup> /µL) | (x10 <sup>3</sup> /µL) | (x10 <sup>3</sup> /µL) | (%)   | (%)   | (x10 <sup>3</sup> /µL) | (x10 <sup>3</sup> /µL) | (x10 <sup>3</sup> /µL) |
|      |       | -7    | 2     | 15    | -7                     | 2                      | 15                     | -7    | 15    | -7                     | 2                      | 15                     |
| 4001 |       | 22.9  | 53.5  | 77.7  | 0.10                   | 0.07                   | 0.05                   | 1.3   | 2.1   | 0.00                   | 0.01                   | 0.01                   |



Appendix 7 Individual Hematology (Cont'd)

Sex: Male

| 4     | %EOS | %EOS | %EOS | #BASO                  | #BASO                  | #BASO                  | %BASO | %BASO | %BASO | PLT                    | PLT                    | PLT                    |
|-------|------|------|------|------------------------|------------------------|------------------------|-------|-------|-------|------------------------|------------------------|------------------------|
| 1000  | (%)  | (%)  | (%)  | (x10 <sup>3</sup> /µL) | (x10 <sup>3</sup> /µL) | (x10 <sup>3</sup> /µL) | (%)   | (%)   | (%)   | (x10 <sup>3</sup> /µL) | (x10 <sup>3</sup> /µL) | (x10 <sup>3</sup> /µL) |
| mg/kg | -7   | 2    | 15   | -7                     | 2                      | 15                     | -7    | 2     | 15    | -7                     | 2                      | 15                     |
| 4001  | 0.0  | 0.4  | 0.3  | 0.00                   | 0.01                   | 0.02                   | 0.0   | 0.2   | 0.5   | 465                    | 500                    | 499                    |

Appendix 7 Individual Hematology (Cont'd)

| Sex: Male |  | MPV  | MPV  | MPV  |
|-----------|--|------|------|------|
| 4         |  |      |      |      |
| 1000      |  |      |      |      |
| mg/kg     |  | (fL) | (fL) | (fL) |
|           |  | -7   | 2    | 15   |
| 4001      |  | 7.5  | 8.0  | 7.5  |

Appendix 7 Individual Hematology (Cont'd)

Sex: Female

| 1     | WBC                    | WBC                    | WBC                    | RBC                    | RBC                    | RBC                    | HGB    | HGB    | HGB    | HCT  | HCT  | HCT  |
|-------|------------------------|------------------------|------------------------|------------------------|------------------------|------------------------|--------|--------|--------|------|------|------|
| 0     | (x10 <sup>3</sup> /μL) | (x10 <sup>3</sup> /μL) | (x10 <sup>3</sup> /μL) | (x10 <sup>6</sup> /μL) | (x10 <sup>6</sup> /μL) | (x10 <sup>6</sup> /μL) | (g/dL) | (g/dL) | (g/dL) | (%)  | (%)  | (%)  |
| mg/kg | -7                     | 2                      | 15                     | -7                     | 2                      | 15                     | -7     | 2      | 15     | -7   | 2    | 15   |
|       | 7.05                   | 4.34                   | 5.43                   | 5.62                   | 5.42                   | 5.75                   | 12.0   | 11.4   | 12.0   | 41.7 | 40.1 | 43.1 |

Appendix 7 Individual Hematology (Cont'd)

Sex: Female

| 1     | MCV  | MCV  | MCV  | MCV  | MCH  | MCH  | MCHC   | MCHC   | MCHC   | RDW  | RDW  | RDW  |
|-------|------|------|------|------|------|------|--------|--------|--------|------|------|------|
| 0     | (fL) | (fL) | (fL) | (fL) | (pg) | (pg) | (g/dL) | (g/dL) | (g/dL) | (%)  | (%)  | (%)  |
| mg/kg | -7   | 2    | 15   | 15   | -7   | 2    | 15     | 2      | 15     | -7   | 2    | 15   |
|       | 74.1 | 74.0 | 74.9 | 21.3 | 21.0 | 20.8 | 28.7   | 28.3   | 27.8   | 12.7 | 12.7 | 13.2 |

Appendix 7 Individual Hematology (Cont'd)

Sex: Female

| 1     | #RET                  | #RET                  | #RET                  | #RET                  | #NEUT                  | #NEUT                  | #NEUT                  | %NEUT | %NEUT | #LYMP                  | #LYMP                  | #LYMP                  |
|-------|-----------------------|-----------------------|-----------------------|-----------------------|------------------------|------------------------|------------------------|-------|-------|------------------------|------------------------|------------------------|
| 0     | (x10 <sup>9</sup> /L) | (x10 <sup>9</sup> /L) | (x10 <sup>9</sup> /L) | (x10 <sup>9</sup> /L) | (x10 <sup>9</sup> /μL) | (x10 <sup>9</sup> /μL) | (x10 <sup>9</sup> /μL) | (%)   | (%)   | (x10 <sup>9</sup> /μL) | (x10 <sup>9</sup> /μL) | (x10 <sup>9</sup> /μL) |
| mg/kg | -7                    | 2                     | 15                    | 79.5                  | -7                     | 2                      | 15                     | -7    | 2     | -7                     | 2                      | 15                     |
|       | 55.7                  | 30.4                  | 79.5                  | 79.5                  | 3.83                   | 1.89                   | 1.18                   | 54.3  | 43.6  | 2.70                   | 2.21                   | 3.68                   |

Appendix 7 Individual Hematology (Cont'd)

Sex: Female

| 1     | %LYMP | %LYMP | %LYMP | #MONO                  | #MONO                  | #MONO                  | %MONO | %MONO | #EOS                   | #EOS                   | #EOS                   |
|-------|-------|-------|-------|------------------------|------------------------|------------------------|-------|-------|------------------------|------------------------|------------------------|
| 0     | (%)   | (%)   | (%)   | (x10 <sup>3</sup> /µL) | (x10 <sup>3</sup> /µL) | (x10 <sup>3</sup> /µL) | (%)   | (%)   | (x10 <sup>3</sup> /µL) | (x10 <sup>3</sup> /µL) | (x10 <sup>3</sup> /µL) |
| mg/kg | -7    | 2     | 15    | -7                     | 2                      | 15                     | -7    | 2     | -7                     | 2                      | 15                     |
|       | 38.3  | 51.0  | 67.8  | 0.37                   | 0.17                   | 0.46                   | 5.2   | 4.0   | 0.10                   | 0.03                   | 0.05                   |

Appendix 7 Individual Hematology (Cont'd)

Sex: Female

| 1     | %EOS | %EOS | %EOS | #BASO                  | #BASO                  | #BASO                  | %BASO | %BASO | %BASO | PLT                    | PLT                    | PLT                    |
|-------|------|------|------|------------------------|------------------------|------------------------|-------|-------|-------|------------------------|------------------------|------------------------|
| 0     | (%)  | (%)  | (%)  | (x10 <sup>3</sup> /μL) | (x10 <sup>3</sup> /μL) | (x10 <sup>3</sup> /μL) | (%)   | (%)   | (%)   | (x10 <sup>3</sup> /μL) | (x10 <sup>3</sup> /μL) | (x10 <sup>3</sup> /μL) |
| mg/kg | -7   | 2    | 15   | -7                     | 2                      | 15                     | -7    | 2     | 15    | -7                     | 2                      | 15                     |
|       | 1.4  | 0.8  | 0.9  | 0.02                   | 0.01                   | 0.01                   | 0.3   | 0.1   | 0.3   | 338                    | 334                    | 416                    |

Appendix 7 Individual Hematology (Cont'd)

| Sex: Female |      | MPV  | MPV  | MPV  |
|-------------|------|------|------|------|
| 1           |      |      |      |      |
| 0           |      |      |      |      |
| mg/kg       |      | (fL) | (fL) | (fL) |
|             |      | -7   | 2    | 15   |
|             | 1501 | 8.6  | 8.0  | 8.6  |



Appendix 7 Individual Hematology (Cont'd)

Sex: Female

| 2501  | 8.58                   | 7.71 | 8.19                   | 5.28 | 5.25                   | 5.07 | 13.5                   | 13.4 | 13.1                   | 41.2 | 42.3   | 41.5 |     |
|-------|------------------------|------|------------------------|------|------------------------|------|------------------------|------|------------------------|------|--------|------|-----|
| WBC   | (x10 <sup>3</sup> /μL) | WBC  | (x10 <sup>3</sup> /μL) | WBC  | (x10 <sup>3</sup> /μL) | RBC  | (x10 <sup>6</sup> /μL) | RBC  | (x10 <sup>6</sup> /μL) | HGB  | (g/dL) | HCT  | (%) |
| -7    | 2                      | 15   | -7                     | 2    | 15                     | -7   | 2                      | 15   | 15                     | -7   | 2      | 15   |     |
| mg/kg |                        |      |                        |      |                        |      |                        |      |                        |      |        |      |     |

Appendix 7 Individual Hematology (Cont'd)

Sex: Female

| 2     | MCV  | MCV  | MCV  | MCV  | MCH  | MCH  | MCH  | MCHC   | MCHC   | MCHC   | RDW  | RDW  | RDW  | RDW |
|-------|------|------|------|------|------|------|------|--------|--------|--------|------|------|------|-----|
| 100   | (fL) | (fL) | (fL) | (fL) | (pg) | (pg) | (pg) | (g/dL) | (g/dL) | (g/dL) | (%)  | (%)  | (%)  | (%) |
| mg/kg | -7   | 2    | 80.6 | 81.8 | 25.6 | 25.5 | 25.9 | 32.8   | 31.7   | 31.6   | 12.5 | 12.6 | 12.9 | 15  |
|       | 77.9 |      |      |      |      |      |      |        |        |        |      |      |      |     |

Appendix 7 Individual Hematology (Cont'd)

Sex: Female

| 2            | #RET<br>(x10 <sup>9</sup> /L) | #RET<br>(x10 <sup>9</sup> /L) | #RET<br>(x10 <sup>9</sup> /L) | #NEUT<br>(x10 <sup>9</sup> /µL) | #NEUT<br>(x10 <sup>9</sup> /µL) | #NEUT<br>(x10 <sup>9</sup> /µL) | %NEUT<br>(%) | %NEUT<br>(%) | %NEUT<br>(%) | #LYMP<br>(x10 <sup>9</sup> /µL) | #LYMP<br>(x10 <sup>9</sup> /µL) | #LYMP<br>(x10 <sup>9</sup> /µL) |
|--------------|-------------------------------|-------------------------------|-------------------------------|---------------------------------|---------------------------------|---------------------------------|--------------|--------------|--------------|---------------------------------|---------------------------------|---------------------------------|
| 100<br>mg/kg | -7                            | 2                             | 15                            | -7                              | 2                               | 15                              | -7           | 2            | 15           | -7                              | 2                               | 15                              |
| 2501         | 52.9                          | 68.0                          | 122.4                         | 5.45                            | 4.79                            | 3.76                            | 63.5         | 62.2         | 45.8         | 2.78                            | 2.49                            | 3.93                            |

## Appendix 7 Individual Hematology (Cont'd)

Sex: Female

| 2<br>100<br>mg/kg | %LYMP | %LYMP | %LYMP | #MONO                  | #MONO                  | #MONO                  | %MONO | %MONO | %MONO | #EOS                   | #EOS                   | #EOS                   |
|-------------------|-------|-------|-------|------------------------|------------------------|------------------------|-------|-------|-------|------------------------|------------------------|------------------------|
|                   | (%)   | (%)   | (%)   | (x10 <sup>3</sup> /μL) | (x10 <sup>3</sup> /μL) | (x10 <sup>3</sup> /μL) | (%)   | (%)   | (%)   | (x10 <sup>3</sup> /μL) | (x10 <sup>3</sup> /μL) | (x10 <sup>3</sup> /μL) |
|                   | -7    | 2     | 15    | -7                     | 2                      | 15                     | -7    | 2     | 15    | -7                     | 2                      | 15                     |
| 2501              | 32.4  | 32.4  | 47.9  | 0.20                   | 0.28                   | 0.30                   | 2.4   | 3.6   | 3.7   | 0.09                   | 0.11                   | 0.14                   |

## Appendix 7 Individual Hematology (Cont'd)

Sex: Female

| 2<br>100<br>mg/kg | %EOS | %EOS | %EOS | #BASO                  | #BASO                  | #BASO                  | %BASO | %BASO | %BASO | PLT                    | PLT                    | PLT                    |
|-------------------|------|------|------|------------------------|------------------------|------------------------|-------|-------|-------|------------------------|------------------------|------------------------|
|                   | (%)  | (%)  | (%)  | (x10 <sup>3</sup> /μL) | (x10 <sup>3</sup> /μL) | (x10 <sup>3</sup> /μL) | (%)   | (%)   | (%)   | (x10 <sup>3</sup> /μL) | (x10 <sup>3</sup> /μL) | (x10 <sup>3</sup> /μL) |
|                   | -7   | 2    | 15   | -7                     | 2                      | 15                     | -7    | 2     | 15    | -7                     | 2                      | 15                     |
| 2501              | 1.1  | 1.4  | 1.7  | 0.02                   | 0.01                   | 0.02                   | 0.2   | 0.1   | 0.3   | 368                    | 370                    | 394                    |

Appendix 7 Individual Hematology (Cont'd)

| Sex: Female |      | MPV  | MPV  | MPV  |
|-------------|------|------|------|------|
| 2           |      |      |      |      |
| 100         |      |      |      |      |
| mg/kg       |      | (fL) | (fL) | (fL) |
|             |      | -7   | 2    | 15   |
|             | 2501 | 10.0 | 9.9  | 10.1 |

Appendix 7 Individual Hematology (Cont'd)

Sex: Female

| 300 mg/kg | WBC<br>(x10 <sup>3</sup> /µL) | WBC<br>(x10 <sup>3</sup> /µL) | WBC<br>(x10 <sup>3</sup> /µL) | RBC<br>(x10 <sup>6</sup> /µL) | RBC<br>(x10 <sup>6</sup> /µL) | RBC<br>(x10 <sup>6</sup> /µL) | HGB<br>(g/dL) | HGB<br>(g/dL) | HGB<br>(g/dL) | HCT<br>(%) | HCT<br>(%) | HCT<br>(%) | HCT<br>(%) |
|-----------|-------------------------------|-------------------------------|-------------------------------|-------------------------------|-------------------------------|-------------------------------|---------------|---------------|---------------|------------|------------|------------|------------|
|           | -7                            | 2                             | 15                            | -7                            | 2                             | 15                            | -7            | 2             | 15            | -7         | 2          | 15         | 15         |
| 3501      | 5.87                          | 6.32                          | 7.06                          | 4.99                          | 4.94                          | 4.97                          | 13.0          | 12.8          | 12.8          | 40.2       | 40.7       | 40.7       | 39.9       |

Appendix 7 Individual Hematology (Cont'd)

Sex: Female

| 300 mg/kg | MCV (fL) | MCV (fL) | MCV (fL) | MCV (fL) | MCH (pg) | MCH (pg) | MCH (pg) | MCHC (g/dL) | MCHC (g/dL) | MCHC (g/dL) | RDW (%) | RDW (%) | RDW (%) |
|-----------|----------|----------|----------|----------|----------|----------|----------|-------------|-------------|-------------|---------|---------|---------|
|           | -7       | 2        | 15       | 80.3     | -7       | 2        | 15       | -7          | 2           | 15          | -7      | 2       | 15      |
| 3501      | 80.5     | 82.4     | 80.3     | 26.0     | 25.9     | 25.7     | 32.3     | 31.5        | 32.1        | 11.6        | 11.8    | 11.7    |         |



Appendix 7 Individual Hematology (Cont'd)

Sex: Female

|           | #RET                  | #RET                  | #RET                  | #RET                  | #NEUT                  | #NEUT                  | #NEUT                  | %NEUT | %NEUT | #LYMP                  | #LYMP                  | #LYMP                  |
|-----------|-----------------------|-----------------------|-----------------------|-----------------------|------------------------|------------------------|------------------------|-------|-------|------------------------|------------------------|------------------------|
|           | (x10 <sup>9</sup> /L) | (x10 <sup>9</sup> /L) | (x10 <sup>9</sup> /L) | (x10 <sup>9</sup> /L) | (x10 <sup>9</sup> /μL) | (x10 <sup>9</sup> /μL) | (x10 <sup>9</sup> /μL) | (%)   | (%)   | (x10 <sup>3</sup> /μL) | (x10 <sup>3</sup> /μL) | (x10 <sup>3</sup> /μL) |
| 3         | -7                    | 2                     | 15                    | -7                    | 2                      | 15                     | -7                     | 2     | 15    | -7                     | 2                      | 15                     |
| 300 mg/kg | 50.8                  | 64.8                  | 55.0                  | 3.19                  | 3.70                   | 3.78                   | 54.3                   | 58.5  | 53.5  | 2.43                   | 2.26                   | 2.84                   |

Appendix 7 Individual Hematology (Cont'd)

Sex: Female

| 300<br>mg/kg | %LYMP |      | %LYMP |      | %MONO                  |      | %MONO |     | %MONO |                        | %EOS                   |                        | #EOS                   |                        |
|--------------|-------|------|-------|------|------------------------|------|-------|-----|-------|------------------------|------------------------|------------------------|------------------------|------------------------|
|              | (%)   | (%)  | (%)   | (%)  | (x10 <sup>3</sup> /µL) | (%)  | (%)   | (%) | (%)   | (x10 <sup>3</sup> /µL) | (x10 <sup>3</sup> /µL) | (x10 <sup>3</sup> /µL) | (x10 <sup>3</sup> /µL) | (x10 <sup>3</sup> /µL) |
|              | -7    | 2    | 15    | 40.2 | -7                     | 2    | 15    | -7  | 2     | 15                     | -7                     | 2                      | 15                     | 15                     |
| 3501         | 41.4  | 35.8 | 40.2  | 0.17 | 0.24                   | 0.22 | 2.9   | 3.7 | 3.1   | 0.03                   | 0.06                   | 0.09                   |                        |                        |

Appendix 7 Individual Hematology (Cont'd)

Sex: Female

|           | %EOS | %EOS | %EOS | #BASO                  | #BASO                  | #BASO                  | %BASO | %BASO | %BASO | PLT                    | PLT                    | PLT                    |
|-----------|------|------|------|------------------------|------------------------|------------------------|-------|-------|-------|------------------------|------------------------|------------------------|
|           | (%)  | (%)  | (%)  | (x10 <sup>3</sup> /μL) | (x10 <sup>3</sup> /μL) | (x10 <sup>3</sup> /μL) | (%)   | (%)   | (%)   | (x10 <sup>3</sup> /μL) | (x10 <sup>3</sup> /μL) | (x10 <sup>3</sup> /μL) |
| 3         | -7   | 2    | 15   | -7                     | 2                      | 15                     | -7    | 2     | 15    | -7                     | 2                      | 15                     |
| 300 mg/kg | 0.5  | 0.9  | 1.3  | 0.01                   | 0.01                   | 0.02                   | 0.2   | 0.1   | 0.2   | 304                    | 294                    | 283                    |

Appendix 7 Individual Hematology (Cont'd)

| Sex: Female |      | MPV  | MPV  | MPV  |
|-------------|------|------|------|------|
| 3           |      |      |      |      |
| 300         |      |      |      |      |
| mg/kg       |      | (fL) | (fL) | (fL) |
|             |      | -7   | 2    | 15   |
|             | 3501 | 10.9 | 11.0 | 10.8 |

Appendix 7 Individual Hematology (Cont'd)

Sex: Female

| 4     | WBC                    | WBC                    | WBC                    | RBC                    | RBC                    | RBC                    | HGB    | HGB    | HGB    | HCT  | HCT  | HCT  |
|-------|------------------------|------------------------|------------------------|------------------------|------------------------|------------------------|--------|--------|--------|------|------|------|
| 1000  | (x10 <sup>3</sup> /µL) | (x10 <sup>3</sup> /µL) | (x10 <sup>3</sup> /µL) | (x10 <sup>6</sup> /µL) | (x10 <sup>6</sup> /µL) | (x10 <sup>6</sup> /µL) | (g/dL) | (g/dL) | (g/dL) | (%)  | (%)  | (%)  |
| mg/kg | -7                     | 2                      | 15                     | -7                     | 2                      | 15                     | -7     | 2      | 15     | -7   | 2    | 15   |
|       | 10.39                  | 6.52                   | 8.05                   | 5.29                   | 5.13                   | 5.81                   | 12.6   | 12.1   | 13.5   | 40.7 | 40.1 | 44.3 |

Appendix 7 Individual Hematology (Cont'd)

Sex: Female

| 4     | MCV  | MCV  | MCV  | MCV  | MCH  | MCH  | MCH  | MCHC   | MCHC   | MCHC   | RDW  | RDW  | RDW | RDW |
|-------|------|------|------|------|------|------|------|--------|--------|--------|------|------|-----|-----|
| 1000  | (fL) | (fL) | (fL) | (fL) | (pg) | (pg) | (pg) | (g/dL) | (g/dL) | (g/dL) | (%)  | (%)  | (%) | (%) |
| mg/kg | -7   | 2    | 2    | 15   | -7   | 15   | 2    | -7     | 2      | 15     | -7   | 2    | 15  | 15  |
|       | 77.0 | 78.2 | 76.3 | 23.8 | 23.6 | 23.2 | 30.9 | 30.1   | 30.4   | 12.5   | 12.8 | 12.9 |     |     |

Appendix 7 Individual Hematology (Cont'd)

Sex: Female

| 4     | #RET                  | #RET                  | #RET                  | #RET                  | #NEUT                  | #NEUT                  | #NEUT                  | %NEUT | %NEUT | #LYMP                  | #LYMP                  | #LYMP                  |
|-------|-----------------------|-----------------------|-----------------------|-----------------------|------------------------|------------------------|------------------------|-------|-------|------------------------|------------------------|------------------------|
| 1000  | (x10 <sup>9</sup> /L) | (x10 <sup>9</sup> /L) | (x10 <sup>9</sup> /L) | (x10 <sup>9</sup> /L) | (x10 <sup>9</sup> /μL) | (x10 <sup>9</sup> /μL) | (x10 <sup>9</sup> /μL) | (%)   | (%)   | (x10 <sup>9</sup> /μL) | (x10 <sup>9</sup> /μL) | (x10 <sup>9</sup> /μL) |
| mg/kg | -7                    | 2                     | 15                    | -7                    | 2                      | 15                     | -7                     | 2     | 15    | -7                     | 2                      | 15                     |
|       | 47.9                  | 53.6                  | 86.2                  | 7.02                  | 3.91                   | 3.66                   | 67.6                   | 60.1  | 45.4  | 2.98                   | 2.18                   | 4.06                   |

Appendix 7 Individual Hematology (Cont'd)

Sex: Female

| 4    |       | %LYMP | %LYMP | %LYMP | #MONO                  | #MONO                  | #MONO                  | %MONO | %MONO | #EOS                   | #EOS                   | #EOS                   |
|------|-------|-------|-------|-------|------------------------|------------------------|------------------------|-------|-------|------------------------|------------------------|------------------------|
| 1000 | mg/kg | (%)   | (%)   | (%)   | (x10 <sup>3</sup> /µL) | (x10 <sup>3</sup> /µL) | (x10 <sup>3</sup> /µL) | (%)   | (%)   | (x10 <sup>3</sup> /µL) | (x10 <sup>3</sup> /µL) | (x10 <sup>3</sup> /µL) |
|      |       | -7    | 2     | 15    | -7                     | 2                      | 15                     | -7    | 15    | -7                     | 2                      | 15                     |
| 4501 |       | 28.7  | 33.5  | 50.4  | 0.29                   | 0.32                   | 0.18                   | 2.8   | 4.8   | 2.2                    | 0.04                   | 0.05                   |
|      |       |       |       |       |                        |                        |                        |       |       |                        |                        | 0.08                   |



## Appendix 7 Individual Hematology (Cont'd)

Sex: Female

| 4<br>1000<br>mg/kg | %EOS | %EOS | %EOS | #BASO                  | #BASO                  | #BASO                  | %BASO | %BASO | %BASO | PLT                    | PLT                    | PLT                    |
|--------------------|------|------|------|------------------------|------------------------|------------------------|-------|-------|-------|------------------------|------------------------|------------------------|
|                    | (%)  | (%)  | (%)  | (x10 <sup>3</sup> /μL) | (x10 <sup>3</sup> /μL) | (x10 <sup>3</sup> /μL) | (%)   | (%)   | (%)   | (x10 <sup>3</sup> /μL) | (x10 <sup>3</sup> /μL) | (x10 <sup>3</sup> /μL) |
|                    | -7   | 2    | 15   | -7                     | 2                      | 15                     | -7    | 2     | 15    | -7                     | 2                      | 15                     |
| 4501               | 0.4  | 0.8  | 1.0  | 0.01                   | 0.01                   | 0.03                   | 0.1   | 0.1   | 0.3   | 404                    | 399                    | 385                    |

## Appendix 7 Individual Hematology (Cont'd)

Sex: Female

| 4<br>1000<br>mg/kg | MPV  | MPV  | MPV  |
|--------------------|------|------|------|
|                    | (fL) | (fL) | (fL) |
|                    | -7   | 2    | 15   |
| 4501               | 7.6  | 7.7  | 7.7  |

Appendix 8

Individual Coagulation

Appendix 8 Individual Coagulation

Key Page

**Measurement Descriptions**

Headings Used

PT

APTT

FIB

Description

Prothrombin Time

Activated Partial Thromboplastin Time

Fibrinogen

Appendix 8 Individual Coagulation (Cont'd)

Sex: Male

| 1001 | PT (Sec) | PT (Sec) | PT (Sec) | APTT (Sec) | APTT (Sec) | APTT (Sec) | FIB (g/L) | FIB (g/L) | FIB (g/L) |
|------|----------|----------|----------|------------|------------|------------|-----------|-----------|-----------|
|      | -7       | 2        | 15       | -7         | 2          | 15         | -7        | 2         | 15        |
|      | 11.0     | 9.2      | 10.2     | 19.3       | 18.8       | 18.4       | 3.19      | 4.36      | 2.87      |

Appendix 8 Individual Coagulation (Cont'd)

Sex: Male

|           | PT    | PT    | PT    | APTT  | APTT  | APTT  | APTT  | FIB   | FIB   | FIB   |
|-----------|-------|-------|-------|-------|-------|-------|-------|-------|-------|-------|
|           | (Sec) | (Sec) | (Sec) | (Sec) | (Sec) | (Sec) | (Sec) | (g/L) | (g/L) | (g/L) |
| 2         | -7    | 2     | 15    | -7    | 2     | 15    | -7    | -7    | 2     | 15    |
| 100 mg/kg | 10.3  | 10.2  | 10.3  | 19.4  | 18.3  | 18.8  | 2.93  | 3.04  | 2.64  |       |

## Appendix 8 Individual Coagulation (Cont'd)

Sex: Male

| 3<br>300<br>mg/kg | PT    | PT    | PT    | APTT  | APTT  | APTT  | FIB   | FIB   | FIB   |
|-------------------|-------|-------|-------|-------|-------|-------|-------|-------|-------|
|                   | (Sec) | (Sec) | (Sec) | (Sec) | (Sec) | (Sec) | (g/L) | (g/L) | (g/L) |
|                   | -7    | 2     | 15    | -7    | 2     | 15    | -7    | 2     | 15    |
| 3001              | 10.5  | 9.9   | 9.6   | 19.1  | 18.0  | 18.5  | 3.00  | 3.66  | 2.69  |

## Appendix 8 Individual Coagulation (Cont'd)

Sex: Male

| 4<br>1000<br>mg/kg | PT    | PT    | PT    | APTT  | APTT  | APTT  | FIB   | FIB   | FIB   |
|--------------------|-------|-------|-------|-------|-------|-------|-------|-------|-------|
|                    | (Sec) | (Sec) | (Sec) | (Sec) | (Sec) | (Sec) | (g/L) | (g/L) | (g/L) |
|                    | -7    | 2     | 15    | -7    | 2     | 15    | -7    | 2     | 15    |
| 4001               | 11.2  | 10.5  | 10.4  | 16.7  | 16.5  | 17.2  | 2.89  | 3.37  | 2.54  |



Appendix 8 Individual Coagulation (Cont'd)

Sex: Female

| 1     | PT    | PT    | PT    | APTT  | APTT  | APTT  | APTT  | FIB   | FIB   | FIB   |
|-------|-------|-------|-------|-------|-------|-------|-------|-------|-------|-------|
| 0     | (Sec) | (Sec) | (Sec) | (Sec) | (Sec) | (Sec) | (Sec) | (g/L) | (g/L) | (g/L) |
| mg/kg | -7    | 2     | 15    | -7    | 2     | 15    | -7    | 2     | 2     | 15    |
| 1501  | 10.5  | 9.5   | 10.3  | 18.6  | 17.7  | 19.9  | 2.37  | 2.99  | 2.35  | 2.35  |

Appendix 8 Individual Coagulation (Cont'd)

Sex: Female

|           | PT    | PT    | PT    | APTT  | APTT  | APTT  | FIB   | FIB   | FIB   |
|-----------|-------|-------|-------|-------|-------|-------|-------|-------|-------|
|           | (Sec) | (Sec) | (Sec) | (Sec) | (Sec) | (Sec) | (g/L) | (g/L) | (g/L) |
| 2         | -7    | 2     | 15    | -7    | 2     | 15    | -7    | 2     | 15    |
| 100 mg/kg | 10.7  | 10.2  | 9.5   | 17.5  | 16.6  | 17.6  | 2.56  | 3.22  | 2.86  |

## Appendix 8 Individual Coagulation (Cont'd)

Sex: Female

| 3<br>300<br>mg/kg | PT    | PT    | PT    | APTT  | APTT  | APTT  | FIB   | FIB   | FIB   |
|-------------------|-------|-------|-------|-------|-------|-------|-------|-------|-------|
|                   | (Sec) | (Sec) | (Sec) | (Sec) | (Sec) | (Sec) | (g/L) | (g/L) | (g/L) |
|                   | -7    | 2     | 15    | -7    | 2     | 15    | -7    | 2     | 15    |
| 3501              | 10.1  | 9.2   | 9.2   | 17.5  | 18.2  | 19.3  | 3.29  | 3.76  | 3.18  |

## Appendix 8 Individual Coagulation (Cont'd)

Sex: Female

| 4<br>1000<br>mg/kg | PT    | PT    | PT    | APTT  | APTT  | APTT  | FIB   | FIB   | FIB   |
|--------------------|-------|-------|-------|-------|-------|-------|-------|-------|-------|
|                    | (Sec) | (Sec) | (Sec) | (Sec) | (Sec) | (Sec) | (g/L) | (g/L) | (g/L) |
|                    | -7    | 2     | 15    | -7    | 2     | 15    | -7    | 2     | 15    |
| 4501               | 10.5  | 9.9   | 9.8   | 19.5  | 18.3  | 19.3  | 2.69  | 3.26  | 2.37  |

Appendix 9

Individual Chemistry

## Appendix 9 Individual Chemistry

Key Page**Measurement Descriptions**Headings Used

ALT

AST

TP

ALB

TBIL

ALP

GGT

sGLU

UREA

CRE

Ca

P

TCHO

TG

K

Na

Cl

GLB

A/G

CK

Description

Alanine Aminotransferase

Aspartate Aminotransferase

Total Protein

Albumin

Total Bilirubin

Alkaline Phosphatase

Gamma-Glutamyltransferase

Glucose

Urea

Creatinine

Calcium

Inorganic Phosphorus

Total Cholesterol

Triglyceride

Potassium

Sodium

Chloride

Globulin

A/G Ratio

Creatine Kinase

SC = Sample Comment

## Appendix 9 Individual Chemistry (Cont'd)

Sex: Male

| 1<br>0<br>mg/kg | ALT   | ALT   | ALT   | AST   | AST   | AST   | TP    | TP    | TP    | ALB   | ALB   | ALB   |
|-----------------|-------|-------|-------|-------|-------|-------|-------|-------|-------|-------|-------|-------|
|                 | (U/L) | (U/L) | (U/L) | (U/L) | (U/L) | (U/L) | (g/L) | (g/L) | (g/L) | (g/L) | (g/L) | (g/L) |
|                 | -7    | 2     | 15    | -7    | 2     | 15    | -7    | 2     | 15    | -7    | 2     | 15    |
| 1001            | 30    | 229   | 42    | 38    | 926   | 44    | 78.2  | 70.7  | 74.4  | 49.5  | 44.6  | 47.2  |

Appendix 9 Individual Chemistry (Cont'd)

Sex: Male

| 1     | TBIL     | TBIL     | TBIL     | TBIL     | ALP   | ALP   | ALP   | ALP   | GGT   | GGT   | GGT   | GGT   | sGLU     | sGLU     | sGLU     | sGLU     |
|-------|----------|----------|----------|----------|-------|-------|-------|-------|-------|-------|-------|-------|----------|----------|----------|----------|
| 0     | (µmol/L) | (µmol/L) | (µmol/L) | (µmol/L) | (U/L) | (U/L) | (U/L) | (U/L) | (U/L) | (U/L) | (U/L) | (U/L) | (mmol/L) | (mmol/L) | (mmol/L) | (mmol/L) |
| mg/kg | -7       | 2        | 15       | -7       | 2     | 15    | -7    | 2     | 15    | -7    | 2     | 15    | -7       | 2        | 15       | 2        |
| 1001  | 6.72     | 15.52    | 10.69    | 451      | 471   | 399   | 96    | 86    | 84    | 3.24  | 3.58  | 2.89  |          |          |          |          |



Appendix 9 Individual Chemistry (Cont'd)

Sex: Male

| 1  | 0    | mg/kg | UREA (mmol/L) | UREA (mmol/L) | UREA (mmol/L) | UREA (mmol/L) | CRE (µmol/L) | CRE (µmol/L) | CRE (µmol/L) | Ca (mmol/L) | Ca (mmol/L) | Ca (mmol/L) | P (mmol/L) | P (mmol/L) | P (mmol/L) |
|----|------|-------|---------------|---------------|---------------|---------------|--------------|--------------|--------------|-------------|-------------|-------------|------------|------------|------------|
| -7 | 6.25 | 2     | 4.58          | 7.94          | 15            | -7            | 55           | 57           | 55           | 2.68        | 2.53        | 2.59        | -7         | 2.66       | 2.43       |
| 15 |      | 2     |               |               | 15            | 2             | 2            | 2            | 15           | 2           | 2           | 15          | 2          | 2          | 15         |

Appendix 9 Individual Chemistry (Cont'd)

Sex: Male

| 1001 | 3.48 | TCHO | (mmol/L) | 2 | 2.82 | TCHO | (mmol/L) | 2 | 3.30 | TCHO | (mmol/L) | 15 | TG | (mmol/L) | -7 | TG | (mmol/L) | 2 | 0.28 | TG | (mmol/L) | 15 | TG | (mmol/L) | 2 | 0.34 | TG | (mmol/L) | 15 | TG | (mmol/L) | 4.8 | K | (mmol/L) | 2 | 15 | K | (mmol/L) | 15 | 5.5 | K | (mmol/L) | -7 | 157 | Na | (mmol/L) | 2 | 148 | Na | (mmol/L) | 15 | 150 | Na | (mmol/L) |
|------|------|------|----------|---|------|------|----------|---|------|------|----------|----|----|----------|----|----|----------|---|------|----|----------|----|----|----------|---|------|----|----------|----|----|----------|-----|---|----------|---|----|---|----------|----|-----|---|----------|----|-----|----|----------|---|-----|----|----------|----|-----|----|----------|
| 1001 | 3.48 | TCHO | (mmol/L) | 2 | 2.82 | TCHO | (mmol/L) | 2 | 3.30 | TCHO | (mmol/L) | 15 | TG | (mmol/L) | -7 | TG | (mmol/L) | 2 | 0.28 | TG | (mmol/L) | 15 | TG | (mmol/L) | 2 | 0.34 | TG | (mmol/L) | 15 | TG | (mmol/L) | 4.8 | K | (mmol/L) | 2 | 15 | K | (mmol/L) | 15 | 5.5 | K | (mmol/L) | -7 | 157 | Na | (mmol/L) | 2 | 148 | Na | (mmol/L) | 15 | 150 | Na | (mmol/L) |

## Appendix 9 Individual Chemistry (Cont'd)

Sex: Male

| 1<br>0<br>mg/kg | Cl       | Cl       | Cl       | GLB   | GLB   | GLB   | A/G  | A/G  | A/G  | CK    | CK    | CK    |
|-----------------|----------|----------|----------|-------|-------|-------|------|------|------|-------|-------|-------|
|                 | (mmol/L) | (mmol/L) | (mmol/L) | (g/L) | (g/L) | (g/L) |      |      |      | (U/L) | (U/L) | (U/L) |
|                 | -7       | 2        | 15       | -7    | 2     | 15    | -7   | 2    | 15   | -7    | 2     | 15    |
| 1001            | 109      | 107      | 107      | 28.7  | 26.1  | 27.2  | 1.72 | 1.71 | 1.74 | 152   | 74800 | 163   |



Appendix 9 Individual Chemistry (Cont'd)

Sex: Male

| 2001  | 3.90     | 4.94     | 6.29     | 471   | 479   | 394   | 62    | 65    | 63    | 3.91     | 3.51     | 2.82     |
|-------|----------|----------|----------|-------|-------|-------|-------|-------|-------|----------|----------|----------|
|       | (µmol/L) | (µmol/L) | (µmol/L) | (U/L) | (U/L) | (U/L) | (U/L) | (U/L) | (U/L) | (mmol/L) | (mmol/L) | (mmol/L) |
|       | TBIL     | TBIL     | TBIL     | ALP   | ALP   | ALP   | GGT   | GGT   | GGT   | sGLU     | sGLU     | sGLU     |
| 100   | -7       | 2        | 15       | -7    | 2     | 15    | -7    | 2     | 15    | -7       | 2        | 15       |
| mg/kg |          |          |          | (U/L) | (U/L) | (U/L) | (U/L) | (U/L) | (U/L) | (mmol/L) | (mmol/L) | (mmol/L) |

Appendix 9 Individual Chemistry (Cont'd)

Sex: Male

| 2    | 100  | mg/kg | UREA     | UREA     | UREA     | UREA     | CRE      | CRE      | CRE      | Ca       | Ca       | Ca       | P        | P        | P        |
|------|------|-------|----------|----------|----------|----------|----------|----------|----------|----------|----------|----------|----------|----------|----------|
|      |      |       | (mmol/L) | (mmol/L) | (mmol/L) | (µmol/L) | (µmol/L) | (µmol/L) | (mmol/L) | (mmol/L) | (mmol/L) | (mmol/L) | (mmol/L) | (mmol/L) | (mmol/L) |
|      |      |       | -7       | 2        | 15       | -7       | 2        | 15       | -7       | 2        | 15       | -7       | 2        | 15       | 15       |
| 2001 | 4.66 | 4.10  | 5.32     | 57       | 56       | 2.63     | 2.60     | 2.51     | 1.95     | 1.73     | 1.89     |          |          |          |          |

Appendix 9 Individual Chemistry (Cont'd)

Sex: Male

|           | TCHO     | TCHO     | TCHO     | TG       | TG       | TG       | K        | K        | K        | Na       | Na       | Na       |
|-----------|----------|----------|----------|----------|----------|----------|----------|----------|----------|----------|----------|----------|
|           | (mmol/L) | (mmol/L) | (mmol/L) | (mmol/L) | (mmol/L) | (mmol/L) | (mmol/L) | (mmol/L) | (mmol/L) | (mmol/L) | (mmol/L) | (mmol/L) |
| 2         | -7       | 2        | 15       | -7       | 2        | 15       | 2        | 2        | 15       | -7       | 2        | 15       |
| 100 mg/kg | 2.65     | 2.50     | 2.54     | 0.51     | 0.52     | 0.47     | 5.3      | 4.9      | 4.5      | 148      | 147      | 145      |







Appendix 9 Individual Chemistry (Cont'd)

Sex: Male

| 300 mg/kg | TBIL (µmol/L) | TBIL (µmol/L) | TBIL (µmol/L) | ALP (U/L) | ALP (U/L) | ALP (U/L) | GGT (U/L) | GGT (U/L) | GGT (U/L) | sGLU (mmol/L) | sGLU (mmol/L) | sGLU (mmol/L) |
|-----------|---------------|---------------|---------------|-----------|-----------|-----------|-----------|-----------|-----------|---------------|---------------|---------------|
|           | -7            | 2             | 15            | -7        | 2         | 15        | -7        | 2         | 15        | -7            | 2             | 15            |
| 3001      | 4.11          | 6.74          | 5.37          | 426       | 393       | 354       | 65        | 57        | 60        | 3.34          | 2.85          | 3.44          |

Appendix 9 Individual Chemistry (Cont'd)

Sex: Male

| 300 mg/kg | UREA (mmol/L) | UREA (mmol/L) | UREA (mmol/L) | UREA (mmol/L) | CRE (µmol/L) | CRE (µmol/L) | CRE (µmol/L) | Ca (mmol/L) | Ca (mmol/L) | Ca (mmol/L) | P (mmol/L) | P (mmol/L) | P (mmol/L) |
|-----------|---------------|---------------|---------------|---------------|--------------|--------------|--------------|-------------|-------------|-------------|------------|------------|------------|
|           | -7            | 2             | 15            | -7            | 2            | 15           | -7           | 15          | 2           | 15          | -7         | 2          | 15         |
| 3001      | 4.54          | 3.84          | 5.71          | 53            | 49           | 50           | 2.73         | 2.73        | 2.64        | 2.73        | 1.56       | 1.23       | 1.73       |

Appendix 9 Individual Chemistry (Cont'd)

Sex: Male

|       | TCHO     | TCHO     | TCHO     | TG       | TG       | TG       | K        | K        | K        | Na       | Na       | Na       |
|-------|----------|----------|----------|----------|----------|----------|----------|----------|----------|----------|----------|----------|
|       | (mmol/L) | (mmol/L) | (mmol/L) | (mmol/L) | (mmol/L) | (mmol/L) | (mmol/L) | (mmol/L) | (mmol/L) | (mmol/L) | (mmol/L) | (mmol/L) |
| 3     | -7       | 2        | 15       | -7       | 2        | 15       | -7       | 2        | 15       | -7       | 2        | 15       |
| 300   | 4.63     | 3.30     | 4.16     | 0.57     | 0.34     | 0.48     | 5.7      | 5.0      | 5.2      | 152      | 148      | 145      |
| mg/kg |          |          |          |          |          |          |          |          |          |          |          |          |

Appendix 9 Individual Chemistry (Cont'd)

Sex: Male

| 3001     | 106      | 105      | 101      | 32.1  | 36.9  | 33.0  | 1.47 | 1.23 | 1.41 | 300   | 12300 | 242   |
|----------|----------|----------|----------|-------|-------|-------|------|------|------|-------|-------|-------|
| (mmol/L) | (mmol/L) | (mmol/L) | (mmol/L) | (g/L) | (g/L) | (g/L) | A/G  | A/G  | A/G  | (U/L) | (U/L) | (U/L) |
| -7       | 2        | 15       | -7       | 2     | 15    | 2     | 2    | 15   | 15   | -7    | 2     | 15    |
| 3001     | 106      | 105      | 101      | 32.1  | 36.9  | 33.0  | 1.47 | 1.23 | 1.41 | 300   | 12300 | 242   |

Appendix 9 Individual Chemistry (Cont'd)

Sex: Male

| 4     | ALT               | ALT   | ALT   | ALT   | AST               | AST   | AST   | AST   | TP                  | TP    | TP    | TP    | ALB                 | ALB   | ALB   | ALB   |
|-------|-------------------|-------|-------|-------|-------------------|-------|-------|-------|---------------------|-------|-------|-------|---------------------|-------|-------|-------|
| 1000  | (U/L)             | (U/L) | (U/L) | (U/L) | (U/L)             | (U/L) | (U/L) | (U/L) | (g/L)               | (g/L) | (g/L) | (g/L) | (g/L)               | (g/L) | (g/L) | (g/L) |
| mg/kg | -7                | 2     | 15    | 38    | -7                | 2     | 208   | 2     | -7                  | 2     | 88.5  | 15    | -7                  | 2     | 2     | 15    |
| 4001  | 45 I <sup>1</sup> | 97    | 38    | 38    | 69 I <sup>1</sup> | 208   | 208   | 2     | 74.7 I <sup>1</sup> | 88.5  | 80.6  | 15    | 44.9 I <sup>1</sup> | 41.5  | 41.5  | 46.4  |

<sup>1</sup>[SC:Slight Hemolysis]

Appendix 9 Individual Chemistry (Cont'd)

Sex: Male

| 4    | TBIL               | TBIL     | TBIL     | TBIL              | ALP   | ALP   | ALP   | ALP              | GGT   | GGT   | GGT   | GGT   | sGLU               | sGLU     | sGLU     | sGLU     |
|------|--------------------|----------|----------|-------------------|-------|-------|-------|------------------|-------|-------|-------|-------|--------------------|----------|----------|----------|
| 1000 | (µmol/L)           | (µmol/L) | (µmol/L) | (µmol/L)          | (U/L) | (U/L) | (U/L) | (U/L)            | (U/L) | (U/L) | (U/L) | (U/L) | (mmol/L)           | (mmol/L) | (mmol/L) | (mmol/L) |
|      | -7                 | 2        | 15       | -7                | 2     | 15    | 15    | -7               | 2     | 15    | 2     | 15    | -7                 | 2        | 2        | 15       |
| 4001 | 3.58 <sup>1*</sup> | 3.70     | 4.46     | 561 <sup>1*</sup> | 454   | 419   | 419   | 79 <sup>1*</sup> | 67    | 74    | 67    | 74    | 4.66 <sup>1*</sup> | 3.64     | 3.64     | 3.71     |

<sup>1</sup>[SC:Slight Hemolysis]

Appendix 9 Individual Chemistry (Cont'd)

| Sex: Male |            | UREA               | UREA     | UREA     | UREA             | CRE      | CRE      | CRE                | Ca                 | Ca       | Ca       | P                  | P        | P        |      |
|-----------|------------|--------------------|----------|----------|------------------|----------|----------|--------------------|--------------------|----------|----------|--------------------|----------|----------|------|
|           |            | (mmol/L)           | (mmol/L) | (mmol/L) | (mmol/L)         | (µmol/L) | (µmol/L) | (µmol/L)           | (mmol/L)           | (mmol/L) | (mmol/L) | (mmol/L)           | (mmol/L) | (mmol/L) |      |
| 4         | 1000 mg/kg | -7                 | 2        | 15       | -7               | 2        | 2        | 15                 | -7                 | 2        | 2        | 15                 | -7       | 2        | 15   |
| 4001      |            | 4.52 <sup>1*</sup> | 3.82     | 6.43     | 58 <sup>1*</sup> | 59       | 67       | 2.53 <sup>1*</sup> | 2.53 <sup>1*</sup> | 2.53     | 2.63     | 1.90 <sup>1*</sup> | 1.80     | 1.80     | 1.96 |

<sup>1</sup>[SC:Slight Hemolysis]



## Appendix 9 Individual Chemistry (Cont'd)

Sex: Male

| 4<br>1000<br>mg/kg | TCHO     | TCHO     | TCHO     | TG       | TG       | TG       | K        | K        | K        | Na       | Na       | Na       |
|--------------------|----------|----------|----------|----------|----------|----------|----------|----------|----------|----------|----------|----------|
|                    | (mmol/L) | (mmol/L) | (mmol/L) | (mmol/L) | (mmol/L) | (mmol/L) | (mmol/L) | (mmol/L) | (mmol/L) | (mmol/L) | (mmol/L) | (mmol/L) |
|                    | -7       | 2        | 15       | -7       | 2        | 15       | -7       | 2        | 15       | -7       | 2        | 15       |
| 4001               | 3.29 †   | 2.52     | 3.23     | 0.37 †   | 0.22     | 0.39     | 5.2 †    | 5.6      | 4.7      | 144 †    | 145      | 147      |

†[SC:Slight Hemolysis]

Appendix 9 Individual Chemistry (Cont'd)

Sex: Male

| 4<br>1000<br>mg/kg | Cl               | Cl       | Cl       | GLB   | GLB   | GLB   | A/G  | A/G  | A/G  | CK                 | CK    | CK    |
|--------------------|------------------|----------|----------|-------|-------|-------|------|------|------|--------------------|-------|-------|
|                    | (mmol/L)         | (mmol/L) | (mmol/L) | (g/L) | (g/L) | (g/L) |      |      |      | (U/L)              | (U/L) | (U/L) |
|                    | -7               | 2        | 15       | -7    | 2     | 15    | -7   | 2    | 15   | -7                 | 2     | 15    |
| 4001               | 103 <sup>1</sup> | 106      | 103      | 29.8  | 47.0  | 34.2  | 1.51 | 0.88 | 1.36 | 2220 <sup>12</sup> | 2390  | 264   |

<sup>1</sup>[SC:Slight Hemolysis]

<sup>2</sup>[SC:Slight Hemolysis]

Appendix 9 Individual Chemistry (Cont'd)

Sex: Female

|   | ALT   | ALT             | ALT   | ALT   | AST                | AST   | AST   | AST                 | TP    | TP    | TP                  | TP    | ALB   | ALB   | ALB   | ALB   |
|---|-------|-----------------|-------|-------|--------------------|-------|-------|---------------------|-------|-------|---------------------|-------|-------|-------|-------|-------|
|   | (U/L) | (U/L)           | (U/L) | (U/L) | (U/L)              | (U/L) | (U/L) | (U/L)               | (g/L) | (g/L) | (g/L)               | (g/L) | (g/L) | (g/L) | (g/L) | (g/L) |
| 1 | -7    | 2               | 15    | -7    | 2                  | 15    | -7    | 2                   | 15    | -7    | 2                   | 15    | -7    | 2     | 15    | 15    |
| 0 | 33    | 83 <sup>1</sup> | 39    | 52    | 255 <sup>1,2</sup> | 40    | 71.1  | 66.8 <sup>1,3</sup> | 71.6  | 39.1  | 36.0 <sup>1,2</sup> | 39.2  |       |       |       |       |

<sup>1</sup>SC:Slight Hemolysis

<sup>2</sup>SC:Slight Hemolysis

<sup>3</sup>SC:Slight Hemolysis

Appendix 9 Individual Chemistry (Cont'd)

Sex: Female

| 1     | TBIL     | TBIL               | TBIL     | TBIL     | ALP               | ALP   | ALP   | ALP              | GGT   | GGT   | GGT                | GGT   | sGLU     | sGLU     | sGLU     | sGLU     |
|-------|----------|--------------------|----------|----------|-------------------|-------|-------|------------------|-------|-------|--------------------|-------|----------|----------|----------|----------|
| 0     | (µmol/L) | (µmol/L)           | (µmol/L) | (µmol/L) | (U/L)             | (U/L) | (U/L) | (U/L)            | (U/L) | (U/L) | (U/L)              | (U/L) | (mmol/L) | (mmol/L) | (mmol/L) | (mmol/L) |
| mg/kg | -7       | 2                  | 15       | -7       | 2                 | 15    | -7    | 2                | 15    | -7    | 2                  | 15    | -7       | 2        | 15       | 15       |
| 1501  | 7.69     | 8.10 <sup>1*</sup> | 6.30     | 461      | 340 <sup>1*</sup> | 344   | 101   | 85 <sup>1*</sup> | 93    | 3.17  | 3.73 <sup>1*</sup> | 3.98  |          |          |          |          |

<sup>1</sup>[SC:Slight Hemolysis]

Appendix 9 Individual Chemistry (Cont'd)

Sex: Female

|       | UREA     | UREA              | UREA     | UREA     | CRE              | CRE      | CRE                | Ca       | Ca       | Ca                 | P        | P        |
|-------|----------|-------------------|----------|----------|------------------|----------|--------------------|----------|----------|--------------------|----------|----------|
|       | (mmol/L) | (mmol/L)          | (mmol/L) | (mmol/L) | (µmol/L)         | (µmol/L) | (µmol/L)           | (mmol/L) | (mmol/L) | (mmol/L)           | (mmol/L) | (mmol/L) |
| 1     | -7       | 2                 | 15       | 5.21     | -7               | 2        | 48                 | -7       | 2        | 15                 | -7       | 15       |
| 0     | 7.23     | 3.32 <sup>1</sup> | 5.21     | 56       | 45 <sup>12</sup> | 2.51     | 2.37 <sup>12</sup> | 2.44     | 1.67     | 1.46 <sup>12</sup> | 1.57     |          |
| mg/kg |          |                   |          |          |                  |          |                    |          |          |                    |          |          |

<sup>1</sup>SC:Slight Hemolysis

<sup>12</sup>SC:Slight Hemolysis

Appendix 9 Individual Chemistry (Cont'd)

Sex: Female

|       | TCHO     | TCHO               | TCHO     | TG                 | TG       | TG       | K                 | K        | K        | Na                | Na       | Na       |
|-------|----------|--------------------|----------|--------------------|----------|----------|-------------------|----------|----------|-------------------|----------|----------|
| mg/kg | (mmol/L) | (mmol/L)           | (mmol/L) | (mmol/L)           | (mmol/L) | (mmol/L) | (mmol/L)          | (mmol/L) | (mmol/L) | (mmol/L)          | (mmol/L) | (mmol/L) |
| 1     | -7       | 2                  | -7       | 2                  | 15       | -7       | 2                 | 15       | -7       | 2                 | 15       | 15       |
| 0     | 2.92     | 2.27 <sup>1*</sup> | 0.47     | 0.39 <sup>1*</sup> | 0.54     | 5.7      | 5.7 <sup>1*</sup> | 5.4      | 149      | 145 <sup>1*</sup> | 146      | 146      |

<sup>1</sup>[SC:Slight Hemolysis]

Appendix 9 Individual Chemistry (Cont'd)

Sex: Female

| 1        | 0        | mg/kg    | Cl       | Cl       | Cl    | Cl    | GLB   | GLB   | GLB   | A/G      | A/G      | A/G      | CK    | CK    | CK    | CK    |  |
|----------|----------|----------|----------|----------|-------|-------|-------|-------|-------|----------|----------|----------|-------|-------|-------|-------|--|
| (mmol/L) | (mmol/L) | (mmol/L) | (mmol/L) | (mmol/L) | (g/L) | (g/L) | (g/L) | (g/L) | (g/L) | (mmol/L) | (mmol/L) | (mmol/L) | (U/L) | (U/L) | (U/L) | (U/L) |  |
| -7       | 107      | 107      | 2        | 107      | 105   | 32.0  | 30.8  | 32.4  | 1.22  | 1.17     | 1.21     | 550      | 1280  | 1280  | 1280  | 178   |  |
|          |          |          |          |          |       |       |       |       |       |          |          |          |       |       |       |       |  |

<sup>1</sup>[SC:Slight Hemolysis]

<sup>#</sup>[SC:Slight Hemolysis]





Appendix 9 Individual Chemistry (Cont'd)

Sex: Female

| 2     | 100                   | TBIL                  | TBIL                  | TBIL                  | TBIL  | ALP   | ALP   | ALP   | ALP   | GGT   | GGT   | GGT   | GGT   | sGLU     | sGLU     | sGLU     | sGLU     |
|-------|-----------------------|-----------------------|-----------------------|-----------------------|-------|-------|-------|-------|-------|-------|-------|-------|-------|----------|----------|----------|----------|
| mg/kg | ( $\mu\text{mol/L}$ ) | ( $\mu\text{mol/L}$ ) | ( $\mu\text{mol/L}$ ) | ( $\mu\text{mol/L}$ ) | (U/L) | (U/L) | (U/L) | (U/L) | (U/L) | (U/L) | (U/L) | (U/L) | (U/L) | (mmol/L) | (mmol/L) | (mmol/L) | (mmol/L) |
|       | -7                    | 2                     | 15                    | -7                    | 2     | 15    | 194   | 2     | 15    | -7    | 2     | 15    | -7    | 2        | 15       | 2        | 15       |
| 2501  | 4.52                  | 4.76                  | 3.33                  | 223                   | 212   | 194   | 50    | 47    | 51    | 2.58  | 3.29  | 3.13  |       |          |          |          |          |

Appendix 9 Individual Chemistry (Cont'd)

Sex: Female

| 2 | 100 | mg/kg | UREA     | UREA     | UREA     | UREA     | CRE      | CRE      | CRE      | Ca       | Ca       | Ca       | P        | P        | P        |
|---|-----|-------|----------|----------|----------|----------|----------|----------|----------|----------|----------|----------|----------|----------|----------|
|   |     |       | (mmol/L) | (mmol/L) | (mmol/L) | (µmol/L) | (µmol/L) | (µmol/L) | (mmol/L) | (mmol/L) | (mmol/L) | (mmol/L) | (mmol/L) | (mmol/L) | (mmol/L) |
|   |     |       | -7       | 7.42     | 5.37     | 6.21     | 71       | 69       | 68       | 2.54     | 2.52     | 2.63     | 1.93     | 2        | 1.38     |
|   |     |       | 2        | 5.37     | 6.21     | 71       | 69       | 68       | 2.54     | 2.52     | 2.63     | 1.93     | 2        | 1.38     | 1.72     |
|   |     |       | 15       | 6.21     | 6.21     | 71       | 69       | 68       | 2.54     | 2.52     | 2.63     | 1.93     | 2        | 1.38     | 1.72     |
|   |     |       | -7       | 7.42     | 5.37     | 6.21     | 71       | 69       | 68       | 2.54     | 2.52     | 2.63     | 1.93     | 2        | 1.38     |
|   |     |       | 15       | 6.21     | 6.21     | 71       | 69       | 68       | 2.54     | 2.52     | 2.63     | 1.93     | 2        | 1.38     | 1.72     |







Appendix 9 Individual Chemistry (Cont'd)

Sex: Female

|           | TBIL                  | TBIL                  | TBIL                  | TBIL                  | ALP   | ALP   | ALP   | ALP   | GGT   | GGT   | GGT   | GGT   | sGLU     | sGLU     | sGLU     | sGLU     |
|-----------|-----------------------|-----------------------|-----------------------|-----------------------|-------|-------|-------|-------|-------|-------|-------|-------|----------|----------|----------|----------|
|           | ( $\mu\text{mol/L}$ ) | ( $\mu\text{mol/L}$ ) | ( $\mu\text{mol/L}$ ) | ( $\mu\text{mol/L}$ ) | (U/L) | (U/L) | (U/L) | (U/L) | (U/L) | (U/L) | (U/L) | (U/L) | (mmol/L) | (mmol/L) | (mmol/L) | (mmol/L) |
| 3         | -7                    | 2                     | 15                    | -7                    | 2     | 2     | 15    | -7    | 2     | 2     | 15    | -7    | -7       | 2        | 2        | 15       |
| 300 mg/kg | 3.86                  | 6.25                  | 3.63                  | 264                   | 289   | 258   | 50    | 50    | 50    | 50    | 50    | 3.10  | 1.98     | 3.34     |          |          |









Appendix 9 Individual Chemistry (Cont'd)

Sex: Female

|            | ALT   | ALT   | ALT   | ALT   | AST   | AST   | AST   | AST   | TP    | TP    | TP    | TP    | ALB   | ALB   | ALB   | ALB   |
|------------|-------|-------|-------|-------|-------|-------|-------|-------|-------|-------|-------|-------|-------|-------|-------|-------|
|            | (U/L) | (U/L) | (U/L) | (U/L) | (U/L) | (U/L) | (U/L) | (U/L) | (g/L) | (g/L) | (g/L) | (g/L) | (g/L) | (g/L) | (g/L) | (g/L) |
| 4          | -7    | 2     | 15    | 64    | -7    | 2     | 15    | -7    | 2     | 15    | 77.1  | 39.9  | 2     | 2     | 15    | 40.2  |
| 1000 mg/kg | 35    | 54    | 64    | 37    | 36    | 150   | 70.0  | 86.4  | 77.1  | 39.9  | 36.6  | 40.2  |       |       |       |       |

Appendix 9 Individual Chemistry (Cont'd)

Sex: Female

| 4    | TBIL                  | TBIL                  | TBIL                  | TBIL                  | ALP   | ALP   | ALP   | ALP   | GGT   | GGT   | GGT   | GGT   | sGLU     | sGLU     | sGLU     | sGLU     |
|------|-----------------------|-----------------------|-----------------------|-----------------------|-------|-------|-------|-------|-------|-------|-------|-------|----------|----------|----------|----------|
| 1000 | ( $\mu\text{mol/L}$ ) | ( $\mu\text{mol/L}$ ) | ( $\mu\text{mol/L}$ ) | ( $\mu\text{mol/L}$ ) | (U/L) | (U/L) | (U/L) | (U/L) | (U/L) | (U/L) | (U/L) | (U/L) | (mmol/L) | (mmol/L) | (mmol/L) | (mmol/L) |
|      | -7                    | 2                     | 15                    | -7                    | 2     | 15    | -7    | 2     | 15    | 2     | -7    | 15    | -7       | 2        | 15       | 15       |
| 4501 | 5.55                  | 6.35                  | 5.25                  | 239                   | 187   | 208   | 54    | 45    | 53    | 2.96  | 3.26  | 3.44  |          |          |          |          |



Appendix 9 Individual Chemistry (Cont'd)

Sex: Female

|            | TCHO     | TCHO     | TCHO     | TG       | TG       | TG       | K        | K        | K        | Na       | Na       | Na       |
|------------|----------|----------|----------|----------|----------|----------|----------|----------|----------|----------|----------|----------|
|            | (mmol/L) | (mmol/L) | (mmol/L) | (mmol/L) | (mmol/L) | (mmol/L) | (mmol/L) | (mmol/L) | (mmol/L) | (mmol/L) | (mmol/L) | (mmol/L) |
| 4          | -7       | 2        | 15       | 2        | 15       | -7       | 2        | 15       | -7       | 2        | 15       | 15       |
| 1000 mg/kg | 3.63     | 2.46     | 3.92     | 0.37     | 0.81     | 4.8      | 4.8      | 4.2      | 145      | 143      | 142      | 142      |
