# Supplementary material for: Preclinical Characterization of GLS-010 (Zimberelimab), a Novel Fully Human Anti-PD-1 Therapeutic Monoclonal Antibody for Cancer
Source: PubMed Central journal article supplement (PMC8479189; doi:10.3389/fonc.2021.736955), 2021-09-15
Supplement: DataSheet_2.pdf [file DataSheet_2.pdf]

**Table 5      Summary of Hematology**

Table 5 Summary of Hematology

Key Page**Measurement Descriptions**Headings Used

WBC

RBC

HGB

HCT

MCV

MCH

MCHC

RDW

#RET

#NEUT

%NEUT

#LYMP

%LYMP

#MONO

%MONO

#EOS

%EOS

#BASO

%BASO

PLT

MPV

Description

Leukocyte count

Erythrocyte count

Hemoglobin

Hematocrit

Mean Corpuscular Volume

Mean Corpuscular Hemoglobin

Mean Corpuscular Hemoglobin Conc.

RBC Distribution Width

Reticulocytes, absolute

Neutrophils, absolute

Neutrophils, percent

Lymphocytes, absolute

Lymphocytes, percent

Monocytes, absolute

Monocytes, percent

Eosinophils, absolute

Eosinophils, percent

Basophils, absolute

Basophils, percent

Platelet Count

Mean Platelet Volume

Table 5 Summary of Hematology-Pretest and Dosing Phase

Day(s) Relative to Start Date

| Sex: Male  |       | WBC                    | WBC                    | WBC                    | WBC                    | WBC                    | WBC                    | RBC                    | RBC                    | RBC                    | RBC                    | RBC                    | RBC                    |
|------------|-------|------------------------|------------------------|------------------------|------------------------|------------------------|------------------------|------------------------|------------------------|------------------------|------------------------|------------------------|------------------------|
|            |       | (x10 <sup>3</sup> /μL) | (x10 <sup>3</sup> /μL) | (x10 <sup>3</sup> /μL) | (x10 <sup>3</sup> /μL) | (x10 <sup>3</sup> /μL) | (x10 <sup>3</sup> /μL) | (x10 <sup>6</sup> /μL) | (x10 <sup>6</sup> /μL) | (x10 <sup>6</sup> /μL) | (x10 <sup>6</sup> /μL) | (x10 <sup>6</sup> /μL) | (x10 <sup>6</sup> /μL) |
|            |       | [a]                    | [a1]                   | [a1]                   | [a1]                   | [a1]                   | [a1]                   | [a1]                   | [a1]                   | [a1]                   | [a1]                   | [a1]                   | [a1]                   |
|            |       | -11                    | -6                     | 53                     | 87                     | 123                    | 179                    | -11                    | -6                     | 53                     | 87                     | 123                    | 179                    |
| 1          | Mean  | 10.80                  | 11.39                  | 10.28                  | 9.64                   | 7.88                   | 9.89                   | 5.71                   | 5.50                   | 5.85                   | 5.75                   | 5.80                   | 5.65                   |
| 0          | SD    | 4.25                   | 2.95                   | 2.73                   | 4.09                   | 0.87                   | 4.00                   | 0.30                   | 0.27                   | 0.23                   | 0.24                   | 0.34                   | 0.29                   |
| mg/kg/dose | N     | 6                      | 6                      | 6                      | 6                      | 6                      | 6                      | 6                      | 6                      | 6                      | 6                      | 6                      | 6                      |
| 2          | Mean  | 9.55                   | 10.87                  | 9.58                   | 11.18                  | 8.64                   | 8.35                   | 5.63                   | 5.49                   | 5.98                   | 5.75                   | 5.85                   | 5.63                   |
| 5          | SD    | 3.10                   | 4.29                   | 2.77                   | 4.12                   | 3.67                   | 2.31                   | 0.62                   | 0.57                   | 0.36                   | 0.42                   | 0.35                   | 0.45                   |
| mg/kg/dose | N     | 6                      | 6                      | 6                      | 6                      | 6                      | 6                      | 6                      | 6                      | 6                      | 6                      | 6                      | 6                      |
|            | %Diff | -11.52                 | -4.57                  | -6.84                  | 15.99                  | 9.53                   | -15.55                 | -1.40                  | -0.21                  | 2.28                   | -0.14                  | 0.83                   | -0.47                  |
| 3          | Mean  | 8.70                   | 9.89                   | 9.32                   | 7.92                   | 9.29                   | 7.37                   | 5.75                   | 5.43                   | 5.95                   | 5.59                   | 5.69                   | 5.79                   |
| 25         | SD    | 1.32                   | 1.90                   | 1.15                   | 1.49                   | 1.45                   | 1.76                   | 0.47                   | 0.41                   | 0.40                   | 0.70                   | 0.44                   | 0.30                   |
| mg/kg/dose | N     | 6                      | 6                      | 6                      | 6                      | 6                      | 6                      | 6                      | 6                      | 6                      | 6                      | 6                      | 6                      |
|            | %Diff | -19.45                 | -13.16                 | -9.31                  | -17.87                 | 17.89                  | -25.51                 | 0.64                   | -1.36                  | 1.74                   | -2.87                  | -1.81                  | 2.45                   |
| 4          | Mean  | 8.51                   | 11.24                  | 11.71                  | 10.16                  | 10.07                  | 7.59                   | 5.79                   | 5.70                   | 5.99                   | 5.57                   | 5.85                   | 5.64                   |
| 100        | SD    | 1.99                   | 3.30                   | 5.44                   | 5.82                   | 4.73                   | 1.97                   | 0.11                   | 0.26                   | 0.33                   | 0.75                   | 0.79                   | 0.64                   |
| mg/kg/dose | N     | 6                      | 6                      | 6                      | 6                      | 6                      | 6                      | 6                      | 6                      | 6                      | 6                      | 6                      | 6                      |
|            | %Diff | -21.21                 | -1.27                  | 13.89                  | 5.38                   | 27.74                  | -23.31                 | 1.34                   | 3.58                   | 2.40                   | -3.16                  | 0.80                   | -0.18                  |

[a] - Anova & Dunnett(Log)

[a1] - Anova & Dunnett

Table 5 Summary of Hematology-Pretest and Dosing Phase (Cont'd)

Day(s) Relative to Start Date

| Sex: Male |       | HGB    | HGB    | HGB    | HGB    | HGB    | HGB    | HCT  | HCT  | HCT  | HCT  | HCT  | HCT  |
|-----------|-------|--------|--------|--------|--------|--------|--------|------|------|------|------|------|------|
|           |       | (g/dL) | (g/dL) | (g/dL) | (g/dL) | (g/dL) | (g/dL) | (%)  | (%)  | (%)  | (%)  | (%)  | (%)  |
|           |       | [a]    | [a1]   | [a]    | [a]    | [a]    | [a]    | [a]  | [a]  | [a]  | [a]  | [a]  | [a]  |
|           |       | -11    | -6     | 53     | 87     | 123    | 179    | -11  | -6   | 53   | 87   | 123  | 179  |
| 1         | Mean  | 13.2   | 12.6   | 13.5   | 13.2   | 13.6   | 13.3   | 43.3 | 42.4 | 44.6 | 43.5 | 43.3 | 43.0 |
| 0         | SD    | 0.5    | 0.2    | 0.7    | 0.5    | 0.4    | 0.6    | 2.1  | 1.5  | 3.9  | 1.5  | 1.7  | 2.3  |
|           | N     | 6      | 6      | 6      | 6      | 6      | 6      | 6    | 6    | 6    | 6    | 6    | 6    |
| 2         | Mean  | 12.6   | 12.3   | 13.2   | 12.7   | 13.2   | 12.7   | 41.5 | 41.1 | 42.9 | 41.5 | 42.2 | 41.2 |
| 5         | SD    | 1.4    | 1.2    | 0.6    | 0.8    | 0.9    | 0.9    | 4.2  | 3.3  | 1.6  | 2.7  | 2.4  | 3.0  |
|           | N     | 6      | 6      | 6      | 6      | 6      | 6      | 6    | 6    | 6    | 6    | 6    | 6    |
|           | %Diff | -4.2   | -2.5   | -2.1   | -4.0   | -2.6   | -4.5   | -4.1 | -3.0 | -3.7 | -4.6 | -2.6 | -4.3 |
| 3         | Mean  | 13.7   | 12.9   | 14.0   | 13.1   | 13.7   | 13.8   | 43.9 | 42.1 | 44.8 | 42.2 | 43.3 | 44.2 |
| 25        | SD    | 0.5    | 0.5    | 0.3    | 1.4    | 0.6    | 0.5    | 1.1  | 1.8  | 2.1  | 4.9  | 2.1  | 1.4  |
|           | N     | 6      | 6      | 6      | 6      | 6      | 6      | 6    | 6    | 6    | 6    | 6    | 6    |
|           | %Diff | 3.8    | 1.8    | 4.2    | -0.4   | 1.2    | 4.3    | 1.5  | -0.7 | 0.4  | -2.9 | 0.1  | 2.7  |
| 4         | Mean  | 13.3   | 13.1   | 13.6   | 12.6   | 13.5   | 13.0   | 42.8 | 42.9 | 43.8 | 41.5 | 43.8 | 42.6 |
| 100       | SD    | 0.5    | 0.6    | 0.4    | 1.5    | 1.7    | 1.3    | 2.1  | 2.9  | 1.3  | 2.7  | 3.8  | 2.4  |
|           | N     | 6      | 6      | 6      | 6      | 6      | 6      | 6    | 6    | 6    | 6    | 6    | 6    |
|           | %Diff | 1.0    | 3.4    | 0.9    | -4.6   | -0.1   | -2.1   | -1.3 | 1.3  | -1.8 | -4.4 | 1.1  | -0.9 |

[a] - Anova &amp; Dunnett

[a1] - Kruskal-Wallis &amp; Dunnett on Ranks

Table 5 Summary of Hematology-Pretest and Dosing Phase (Cont'd)

Day(s) Relative to Start Date

| Sex: Male  |       | MCV  | MCV  | MCV  | MCV  | MCV  | MCV  | MCH  | MCH  | MCH  | MCH  | MCH  | MCH  |
|------------|-------|------|------|------|------|------|------|------|------|------|------|------|------|
|            |       | (fL) | (fL) | (fL) | (fL) | (fL) | (fL) | (pg) | (pg) | (pg) | (pg) | (pg) | (pg) |
|            |       | [a]  | [a]  | [a]  | [a]  | [a]  | [a]  | [a]  | [a]  | [a]  | [a]  | [a]  | [a]  |
|            |       | -11  | -6   | 53   | 87   | 123  | 179  | -11  | -6   | 53   | 87   | 123  | 179  |
| 1          | Mean  | 76.0 | 77.1 | 76.2 | 75.6 | 74.9 | 76.1 | 23.0 | 23.0 | 23.0 | 23.0 | 23.4 | 23.5 |
| 0          | SD    | 3.9  | 3.6  | 4.5  | 3.7  | 3.7  | 3.4  | 0.7  | 0.9  | 0.6  | 0.8  | 0.7  | 0.9  |
| mg/kg/dose | N     | 6    | 6    | 6    | 6    | 6    | 6    | 6    | 6    | 6    | 6    | 6    | 6    |
| 2          | Mean  | 74.0 | 75.1 | 72.0 | 72.3 | 72.3 | 73.3 | 22.4 | 22.5 | 22.1 | 22.1 | 22.6 | 22.6 |
| 5          | SD    | 5.2  | 4.3  | 4.3  | 4.7  | 4.6  | 5.0  | 1.6  | 1.7  | 1.5  | 1.6  | 1.5  | 1.7  |
| mg/kg/dose | N     | 6    | 6    | 6    | 6    | 6    | 6    | 6    | 6    | 6    | 6    | 6    | 6    |
|            | %Diff | -2.7 | -2.6 | -5.6 | -4.3 | -3.4 | -3.7 | -2.6 | -2.2 | -4.0 | -3.8 | -3.6 | -3.9 |
| 3          | Mean  | 76.8 | 77.7 | 75.4 | 75.6 | 76.3 | 76.3 | 23.9 | 23.8 | 23.7 | 23.6 | 24.2 | 23.9 |
| 25         | SD    | 4.9  | 4.5  | 3.1  | 3.1  | 2.9  | 2.7  | 1.3  | 1.3  | 1.1  | 0.9  | 1.0  | 0.7  |
| mg/kg/dose | N     | 6    | 6    | 6    | 6    | 6    | 6    | 6    | 6    | 6    | 6    | 6    | 6    |
|            | %Diff | 1.1  | 0.8  | -1.1 | 0.1  | 1.9  | 0.3  | 3.6  | 3.4  | 2.7  | 2.8  | 3.1  | 1.6  |
| 4          | Mean  | 73.9 | 75.3 | 73.3 | 75.3 | 75.4 | 76.0 | 23.0 | 23.0 | 22.7 | 22.6 | 23.2 | 23.1 |
| 100        | SD    | 3.0  | 3.4  | 3.3  | 7.3  | 5.8  | 5.4  | 0.8  | 0.8  | 0.8  | 0.9  | 0.9  | 0.8  |
| mg/kg/dose | N     | 6    | 6    | 6    | 6    | 6    | 6    | 6    | 6    | 6    | 6    | 6    | 6    |
|            | %Diff | -2.8 | -2.4 | -3.9 | -0.4 | 0.7  | -0.2 | -0.3 | -0.1 | -1.3 | -1.5 | -0.9 | -1.8 |

[a] - Anova &amp; Dunnett

Table 5 Summary of Hematology-Pretest and Dosing Phase (Cont'd)

Day(s) Relative to Start Date

| Sex: Male  |       | MCHC   | MCHC   | MCHC   | MCHC   | MCHC   | MCHC   | RDW  | RDW  | RDW  | RDW  | RDW  | RDW  |
|------------|-------|--------|--------|--------|--------|--------|--------|------|------|------|------|------|------|
|            |       | (g/dL) | (g/dL) | (g/dL) | (g/dL) | (g/dL) | (g/dL) | (%)  | (%)  | (%)  | (%)  | (%)  | (%)  |
|            |       | [a]    | [a]    | [a]    | [a]    | [a]    | [a]    | [a]  | [a]  | [a]  | [a]  | [a]  | [a]  |
|            |       | -11    | -6     | 53     | 87     | 123    | 179    | -11  | -6   | 53   | 87   | 123  | 179  |
| 1          | Mean  | 30.4   | 29.8   | 30.3   | 30.4   | 31.3   | 30.9   | 13.5 | 13.5 | 13.3 | 13.5 | 13.0 | 13.6 |
| 0          | SD    | 0.7    | 0.7    | 1.1    | 0.9    | 0.9    | 0.6    | 0.6  | 0.5  | 0.3  | 0.5  | 0.7  | 0.5  |
| mg/kg/dose | N     | 6      | 6      | 6      | 6      | 6      | 6      | 6    | 6    | 6    | 6    | 6    | 6    |
| 2          | Mean  | 30.3   | 29.9   | 30.7   | 30.5   | 31.3   | 30.8   | 14.1 | 13.8 | 13.3 | 13.7 | 12.8 | 14.0 |
| 5          | SD    | 0.5    | 0.9    | 0.7    | 0.6    | 0.8    | 1.0    | 1.4  | 1.1  | 0.7  | 0.8  | 0.5  | 0.6  |
| mg/kg/dose | N     | 6      | 6      | 6      | 6      | 6      | 6      | 6    | 6    | 6    | 6    | 6    | 6    |
|            | %Diff | -0.2   | 0.2    | 1.4    | 0.4    | -0.2   | -0.3   | 4.2  | 2.2  | 0.0  | 1.4  | -1.5 | 2.4  |
| 3          | Mean  | 31.1   | 30.6   | 31.4   | 31.2   | 31.7   | 31.3   | 13.8 | 13.5 | 12.8 | 13.7 | 12.8 | 13.6 |
| 25         | SD    | 0.5    | 0.6    | 0.9    | 0.6    | 0.5    | 0.2    | 0.7  | 0.5  | 0.5  | 0.9  | 0.7  | 0.4  |
| mg/kg/dose | N     | 6      | 6      | 6      | 6      | 6      | 6      | 6    | 6    | 6    | 6    | 6    | 6    |
|            | %Diff | 2.4    | 2.6    | 3.7    | 2.7    | 1.2    | 1.3    | 1.9  | 0.4  | -3.1 | 1.6  | -1.3 | -0.5 |
| 4          | Mean  | 31.1   | 30.5   | 31.1   | 30.2   | 30.9   | 30.4   | 13.7 | 13.6 | 13.1 | 13.5 | 12.8 | 13.6 |
| 100        | SD    | 0.7    | 0.9    | 1.0    | 2.2    | 1.7    | 1.8    | 0.4  | 0.4  | 0.4  | 0.4  | 0.4  | 0.5  |
| mg/kg/dose | N     | 6      | 6      | 6      | 6      | 6      | 6      | 6    | 6    | 6    | 6    | 6    | 6    |
|            | %Diff | 2.3    | 2.3    | 2.6    | -0.6   | -1.4   | -1.6   | 1.1  | 1.2  | -1.0 | 0.2  | -1.5 | -0.2 |

[a] - Anova &amp; Dunnett

Table 5 Summary of Hematology-Pretest and Dosing Phase (Cont'd)

Day(s) Relative to Start Date

| Sex: Male  |       | #RET                  | #RET                  | #RET                  | #RET                  | #RET                  | #RET                  | #NEUT                  | #NEUT                  | #NEUT                  | #NEUT                  | #NEUT                  | #NEUT                  |
|------------|-------|-----------------------|-----------------------|-----------------------|-----------------------|-----------------------|-----------------------|------------------------|------------------------|------------------------|------------------------|------------------------|------------------------|
|            |       | (x10 <sup>9</sup> /L) | (x10 <sup>9</sup> /L) | (x10 <sup>9</sup> /L) | (x10 <sup>9</sup> /L) | (x10 <sup>9</sup> /L) | (x10 <sup>9</sup> /L) | (x10 <sup>3</sup> /μL) | (x10 <sup>3</sup> /μL) | (x10 <sup>3</sup> /μL) | (x10 <sup>3</sup> /μL) | (x10 <sup>3</sup> /μL) | (x10 <sup>3</sup> /μL) |
|            |       | [a]                   | [a1]                  | [a1]                  | [a1]                  | [a]                   | [a]                   | [a1]                   | [a1]                   | [a]                    | [a1]                   | [a]                    | [a]                    |
|            |       | -11                   | -6                    | 53                    | 87                    | 123                   | 179                   | -11                    | -6                     | 53                     | 87                     | 123                    | 179                    |
| 1          | Mean  | 42.4                  | 64.1                  | 49.4                  | 55.3                  | 53.9                  | 59.7                  | 5.77                   | 3.76                   | 3.16                   | 3.27                   | 1.99                   | 3.36                   |
| 0          | SD    | 18.2                  | 26.2                  | 14.0                  | 17.0                  | 21.9                  | 15.5                  | 2.73                   | 1.63                   | 2.45                   | 2.71                   | 0.69                   | 2.67                   |
| mg/kg/dose | N     | 6                     | 6                     | 6                     | 6                     | 6                     | 6                     | 6                      | 6                      | 6                      | 6                      | 6                      | 6                      |
| 2          | Mean  | 99.0                  | 93.4                  | 44.5                  | 58.5                  | 46.1                  | 57.5                  | 4.19                   | 3.13                   | 2.29                   | 4.60                   | 2.12                   | 1.66                   |
| 5          | SD    | 98.8                  | 72.6                  | 12.7                  | 23.9                  | 7.1                   | 31.1                  | 2.26                   | 1.56                   | 0.44                   | 3.49                   | 1.58                   | 0.73                   |
| mg/kg/dose | N     | 6                     | 6                     | 6                     | 6                     | 6                     | 6                     | 6                      | 6                      | 6                      | 6                      | 6                      | 6                      |
|            | %Diff | 133.4                 | 45.8                  | -10.1                 | 5.9                   | -14.6                 | -3.7                  | -27.40                 | -16.75                 | -27.58                 | 40.38                  | 6.71                   | -50.70                 |
| 3          | Mean  | 58.0                  | 68.3                  | 38.7                  | 76.5                  | 55.9                  | 48.2                  | 4.72                   | 3.66                   | 3.25                   | 2.39                   | 3.31                   | 1.51                   |
| 25         | SD    | 20.4                  | 25.3                  | 13.2                  | 54.2                  | 15.8                  | 9.9                   | 1.90                   | 2.21                   | 2.35                   | 0.96                   | 2.55                   | 0.50                   |
| mg/kg/dose | N     | 6                     | 6                     | 6                     | 6                     | 6                     | 6                     | 6                      | 6                      | 6                      | 6                      | 6                      | 6                      |
|            | %Diff | 36.8                  | 6.7                   | -21.7                 | 38.5                  | 3.7                   | -19.3                 | -18.31                 | -2.70                  | 2.96                   | -27.09                 | 66.78                  | -54.92                 |
| 4          | Mean  | 49.3                  | 69.1                  | 60.8                  | 108.5                 | 87.8                  | 93.2                  | 4.39                   | 4.91                   | 6.11                   | 5.65                   | 5.10                   | 2.23                   |
| 100        | SD    | 17.1                  | 36.8                  | 28.2                  | 126.5                 | 93.6                  | 111.2                 | 2.30                   | 2.90                   | 5.43                   | 5.56                   | 4.81                   | 1.08                   |
| mg/kg/dose | N     | 6                     | 6                     | 6                     | 6                     | 6                     | 6                     | 6                      | 6                      | 6                      | 6                      | 6                      | 6                      |
|            | %Diff | 16.2                  | 7.9                   | 23.0                  | 96.3                  | 62.9                  | 56.1                  | -23.94                 | 30.48                  | 93.61                  | 72.71                  | 156.88                 | -33.71                 |

[a] - Anova &amp; Dunnett(Log)

[a1] - Anova &amp; Dunnett

Table 5 Summary of Hematology-Pretest and Dosing Phase (Cont'd)

Day(s) Relative to Start Date

| Sex: Male  |       | %NEUT | %NEUT | %NEUT | %NEUT | %NEUT | %NEUT | #LYMP                  | #LYMP                  | #LYMP                  | #LYMP                  | #LYMP                  | #LYMP                  |
|------------|-------|-------|-------|-------|-------|-------|-------|------------------------|------------------------|------------------------|------------------------|------------------------|------------------------|
|            |       | (%)   | (%)   | (%)   | (%)   | (%)   | (%)   | (x10 <sup>3</sup> /μL) | (x10 <sup>3</sup> /μL) | (x10 <sup>3</sup> /μL) | (x10 <sup>3</sup> /μL) | (x10 <sup>3</sup> /μL) | (x10 <sup>3</sup> /μL) |
|            |       | [a]   | [a]   | [a]   | [a]   | [a1]  | [a]   | [a]                    | [a]                    | [a]                    | [a]                    | [a]                    | [a]                    |
|            |       | -11   | -6    | 53    | 87    | 123   | 179   | -11                    | -6                     | 53                     | 87                     | 123                    | 179                    |
| 1          | Mean  | 52.0  | 32.8  | 28.0  | 30.7  | 25.2  | 31.1  | 4.62                   | 6.90                   | 6.56                   | 5.83                   | 5.39                   | 5.86                   |
| 0          | SD    | 7.0   | 8.0   | 16.1  | 12.8  | 8.3   | 14.6  | 1.45                   | 2.00                   | 1.43                   | 2.12                   | 0.87                   | 2.10                   |
| mg/kg/dose | N     | 6     | 6     | 6     | 6     | 6     | 6     | 6                      | 6                      | 6                      | 6                      | 6                      | 6                      |
| 2          | Mean  | 42.6  | 29.2  | 24.4  | 37.5  | 22.9  | 20.7  | 4.89                   | 7.03                   | 6.67                   | 6.02                   | 6.06                   | 6.15                   |
| 5          | SD    | 15.4  | 11.6  | 3.4   | 16.4  | 9.0   | 9.7   | 2.06                   | 3.27                   | 2.28                   | 1.85                   | 2.13                   | 2.28                   |
| mg/kg/dose | N     | 6     | 6     | 6     | 6     | 6     | 6     | 6                      | 6                      | 6                      | 6                      | 6                      | 6                      |
|            | %Diff | -18.1 | -11.0 | -13.0 | 22.1  | -9.0  | -33.4 | 5.92                   | 1.79                   | 1.68                   | 3.20                   | 12.40                  | 4.98                   |
| 3          | Mean  | 52.7  | 35.8  | 33.3  | 30.4  | 33.9  | 20.5  | 3.73                   | 5.76                   | 5.67                   | 5.15                   | 5.54                   | 5.46                   |
| 25         | SD    | 18.0  | 19.3  | 19.5  | 12.0  | 21.2  | 4.0   | 1.07                   | 1.87                   | 1.47                   | 1.29                   | 1.88                   | 1.23                   |
| mg/kg/dose | N     | 6     | 6     | 6     | 6     | 6     | 6     | 6                      | 6                      | 6                      | 6                      | 6                      | 6                      |
|            | %Diff | 1.3   | 9.2   | 18.8  | -1.0  | 34.9  | -34.0 | -19.37                 | -16.59                 | -13.64                 | -11.70                 | 2.81                   | -6.83                  |
| 4          | Mean  | 50.6  | 42.7  | 45.9  | 48.7  | 42.7  | 30.5  | 3.80                   | 5.80                   | 5.07                   | 4.07                   | 4.56                   | 5.00                   |
| 100        | SD    | 18.9  | 15.9  | 23.3  | 22.3  | 24.5  | 12.8  | 1.73                   | 2.18                   | 1.60                   | 1.66                   | 1.58                   | 2.03                   |
| mg/kg/dose | N     | 6     | 6     | 6     | 6     | 6     | 6     | 6                      | 6                      | 6                      | 6                      | 6                      | 6                      |
|            | %Diff | -2.7  | 30.1  | 63.7  | 58.8  | 69.6  | -2.0  | -17.71                 | -15.96                 | -22.71                 | -30.11                 | -15.40                 | -14.57                 |

[a] - Anova &amp; Dunnett

[a1] - Anova &amp; Dunnett(Log)



Table 5 Summary of Hematology-Pretest and Dosing Phase (Cont'd)

Day(s) Relative to Start Date

| Sex: Male  |       | %LYMP | %LYMP | %LYMP | %LYMP | %LYMP | %LYMP | #MONO                  | #MONO                  | #MONO                  | #MONO                  | #MONO                  | #MONO                  |
|------------|-------|-------|-------|-------|-------|-------|-------|------------------------|------------------------|------------------------|------------------------|------------------------|------------------------|
|            |       | (%)   | (%)   | (%)   | (%)   | (%)   | (%)   | (x10 <sup>3</sup> /μL) | (x10 <sup>3</sup> /μL) | (x10 <sup>3</sup> /μL) | (x10 <sup>3</sup> /μL) | (x10 <sup>3</sup> /μL) | (x10 <sup>3</sup> /μL) |
|            |       | [a]   | [a]   | [a]   | [a]   | [a]   | [a1]  | [a]                    | [a]                    | [a]                    | [a]                    | [a]                    | [a]                    |
|            |       | -11   | -6    | 53    | 87    | 123   | 179   | -11                    | -6                     | 53                     | 87                     | 123                    | 179                    |
| 1          | Mean  | 44.2  | 60.7  | 66.3  | 63.3  | 68.4  | 61.6  | 0.24                   | 0.36                   | 0.28                   | 0.28                   | 0.28                   | 0.34                   |
| 0          | SD    | 6.3   | 8.7   | 14.9  | 12.4  | 8.1   | 14.5  | 0.16                   | 0.09                   | 0.10                   | 0.12                   | 0.05                   | 0.15                   |
| mg/kg/dose | N     | 6     | 6     | 6     | 6     | 6     | 6     | 6                      | 6                      | 6                      | 6                      | 6                      | 6                      |
| 2          | Mean  | 52.7  | 64.6  | 68.9  | 57.3  | 71.7  | 72.9  | 0.27                   | 0.37                   | 0.34                   | 0.35                   | 0.28                   | 0.33                   |
| 5          | SD    | 14.9  | 11.4  | 4.3   | 16.0  | 8.5   | 10.1  | 0.10                   | 0.18                   | 0.12                   | 0.15                   | 0.12                   | 0.11                   |
| mg/kg/dose | N     | 6     | 6     | 6     | 6     | 6     | 6     | 6                      | 6                      | 6                      | 6                      | 6                      | 6                      |
|            | %Diff | 19.3  | 6.5   | 4.0   | -9.4  | 4.8   | 18.2  | 13.89                  | 1.83                   | 22.16                  | 25.00                  | 1.81                   | -2.99                  |
| 3          | Mean  | 44.4  | 59.4  | 62.2  | 64.8  | 61.4  | 74.3  | 0.16                   | 0.29                   | 0.24                   | 0.26                   | 0.29                   | 0.22                   |
| 25         | SD    | 18.0  | 19.0  | 18.6  | 11.6  | 21.9  | 4.1   | 0.05                   | 0.06                   | 0.08                   | 0.08                   | 0.09                   | 0.05                   |
| mg/kg/dose | N     | 6     | 6     | 6     | 6     | 6     | 6     | 6                      | 6                      | 6                      | 6                      | 6                      | 6                      |
|            | %Diff | 0.6   | -2.1  | -6.1  | 2.5   | -10.3 | 20.6  | -31.94                 | -20.18                 | -13.17                 | -8.33                  | 4.22                   | -34.83                 |
| 4          | Mean  | 45.7  | 52.4  | 49.4  | 46.5  | 52.8  | 64.5  | 0.21                   | 0.28                   | 0.29                   | 0.27                   | 0.26                   | 0.20                   |
| 100        | SD    | 18.2  | 15.8  | 22.5  | 21.2  | 23.5  | 13.0  | 0.07                   | 0.07                   | 0.11                   | 0.10                   | 0.10                   | 0.05                   |
| mg/kg/dose | N     | 6     | 6     | 6     | 6     | 6     | 6     | 6                      | 6                      | 6                      | 6                      | 6                      | 6                      |
|            | %Diff | 3.5   | -13.7 | -25.5 | -26.6 | -22.9 | 4.7   | -14.58                 | -22.02                 | 5.39                   | -4.17                  | -6.63                  | -40.30                 |

[a] - Anova &amp; Dunnett

[a1] - Kruskal-Wallis &amp; Dunnett on Ranks

Table 5 Summary of Hematology-Pretest and Dosing Phase (Cont'd)

Day(s) Relative to Start Date

| Sex: Male  |       | %MONO | %MONO | %MONO | %MONO | %MONO | %MONO | #EOS                   | #EOS                   | #EOS                   | #EOS                   | #EOS                   | #EOS                   |
|------------|-------|-------|-------|-------|-------|-------|-------|------------------------|------------------------|------------------------|------------------------|------------------------|------------------------|
|            |       | (%)   | (%)   | (%)   | (%)   | (%)   | (%)   | (x10 <sup>3</sup> /μL) | (x10 <sup>3</sup> /μL) | (x10 <sup>3</sup> /μL) | (x10 <sup>3</sup> /μL) | (x10 <sup>3</sup> /μL) | (x10 <sup>3</sup> /μL) |
|            |       | [a]   | [a]   | [a]   | [a1]  | [a]   | [a]   | [a2]                   | [a]                    | [a]                    | [a]                    | [a2]                   | [a]                    |
|            |       | -11   | -6    | 53    | 87    | 123   | 179   | -11                    | -6                     | 53                     | 87                     | 123                    | 179                    |
| 1          | Mean  | 2.2   | 3.3   | 2.7   | 2.9   | 3.5   | 3.4   | 0.08                   | 0.22                   | 0.17                   | 0.18                   | 0.15                   | 0.25                   |
| 0          | SD    | 0.9   | 0.6   | 0.5   | 0.2   | 0.4   | 1.0   | 0.05                   | 0.20                   | 0.13                   | 0.19                   | 0.16                   | 0.22                   |
| mg/kg/dose | N     | 6     | 6     | 6     | 6     | 6     | 6     | 6                      | 6                      | 6                      | 6                      | 6                      | 6                      |
| 2          | Mean  | 2.9   | 3.3   | 3.6   | 3.2   | 3.3   | 3.9   | 0.10                   | 0.20                   | 0.16                   | 0.12                   | 0.07                   | 0.14                   |
| 5          | SD    | 0.8   | 1.3   | 1.1   | 1.2   | 1.0   | 1.2   | 0.12                   | 0.21                   | 0.12                   | 0.06                   | 0.05                   | 0.11                   |
| mg/kg/dose | N     | 6     | 6     | 6     | 6     | 6     | 6     | 6                      | 6                      | 6                      | 6                      | 6                      | 6                      |
|            | %Diff | 28.4  | 2.6   | 36.5  | 9.7   | -3.8  | 14.8  | 14.00                  | -12.03                 | -5.94                  | -30.48                 | -51.69                 | -43.24                 |
| 3          | Mean  | 1.9   | 3.0   | 2.6   | 3.2   | 3.1   | 3.0   | 0.04                   | 0.10                   | 0.09                   | 0.06                   | 0.05                   | 0.14                   |
| 25         | SD    | 0.5   | 0.6   | 1.0   | 0.7   | 0.8   | 0.6   | 0.02                   | 0.08                   | 0.08                   | 0.06                   | 0.03                   | 0.20                   |
| mg/kg/dose | N     | 6     | 6     | 6     | 6     | 6     | 6     | 6                      | 6                      | 6                      | 6                      | 6                      | 6                      |
|            | %Diff | -15.7 | -8.2  | -0.6  | 9.7   | -9.6  | -11.8 | -52.00                 | -55.64                 | -44.55                 | -64.76                 | -67.42                 | -44.59                 |
| 4          | Mean  | 2.4   | 2.7   | 2.6   | 2.8   | 2.7   | 2.8   | 0.06                   | 0.18                   | 0.13                   | 0.08                   | 0.08                   | 0.09                   |
| 100        | SD    | 0.6   | 0.8   | 0.3   | 0.6   | 0.4   | 0.7   | 0.02                   | 0.08                   | 0.09                   | 0.05                   | 0.04                   | 0.04                   |
| mg/kg/dose | N     | 6     | 6     | 6     | 6     | 6     | 6     | 6                      | 6                      | 6                      | 6                      | 6                      | 6                      |
|            | %Diff | 6.7   | -18.5 | -3.1  | -2.9  | -23.6 | -18.7 | -34.00                 | -26.32                 | -22.77                 | -55.24                 | -46.07                 | -65.54                 |

[a] - Anova & Dunnett  
[a1] - Kruskal-Wallis & Dunnett on Ranks  
[a2] - Anova & Dunnett(Log)

Table 5 Summary of Hematology-Pretest and Dosing Phase (Cont'd)

Day(s) Relative to Start Date

| Sex: Male  |       | %EOS  | %EOS  | %EOS  | %EOS  | %EOS  | %EOS  | #BASO                  | #BASO                  | #BASO                  | #BASO                  | #BASO                  | #BASO                  |
|------------|-------|-------|-------|-------|-------|-------|-------|------------------------|------------------------|------------------------|------------------------|------------------------|------------------------|
|            |       | (%)   | (%)   | (%)   | (%)   | (%)   | (%)   | (x10 <sup>3</sup> /μL) | (x10 <sup>3</sup> /μL) | (x10 <sup>3</sup> /μL) | (x10 <sup>3</sup> /μL) | (x10 <sup>3</sup> /μL) | (x10 <sup>3</sup> /μL) |
|            |       | [a]   | [a]   | [a]   | [a1]  | [a]   | [a]   | [a]                    | [a2]                   | [a]                    | [a]                    | [a]                    | [a]                    |
|            |       | -11   | -6    | 53    | 87    | 123   | 179   | -11                    | -6                     | 53                     | 87                     | 123                    | 179                    |
| 1          | Mean  | 0.9   | 2.1   | 1.8   | 2.2   | 1.9   | 3.0   | 0.03                   | 0.04                   | 0.03                   | 0.02                   | 0.02                   | 0.04                   |
| 0          | SD    | 0.4   | 1.6   | 1.6   | 2.8   | 2.0   | 2.9   | 0.01                   | 0.02                   | 0.01                   | 0.01                   | 0.01                   | 0.02                   |
| mg/kg/dose | N     | 6     | 6     | 6     | 6     | 6     | 6     | 6                      | 6                      | 6                      | 6                      | 6                      | 6                      |
| 2          | Mean  | 1.0   | 1.6   | 1.8   | 1.1   | 0.9   | 1.6   | 0.03                   | 0.03                   | 0.02                   | 0.02                   | 0.03                   | 0.03                   |
| 5          | SD    | 0.8   | 1.0   | 1.3   | 0.5   | 0.6   | 0.9   | 0.02                   | 0.03                   | 0.01                   | 0.01                   | 0.02                   | 0.01                   |
| mg/kg/dose | N     | 6     | 6     | 6     | 6     | 6     | 6     | 6                      | 6                      | 6                      | 6                      | 6                      | 6                      |
|            | %Diff | 11.8  | -22.0 | -4.5  | -50.0 | -52.6 | -47.2 | -6.25                  | -22.73                 | -26.67                 | 0.00                   | 14.29                  | -23.81                 |
| 3          | Mean  | 0.5   | 1.0   | 1.0   | 0.7   | 0.5   | 1.6   | 0.01                   | 0.02                   | 0.02                   | 0.01                   | 0.02                   | 0.02                   |
| 25         | SD    | 0.2   | 0.9   | 1.0   | 0.6   | 0.3   | 2.1   | 0.01                   | 0.01                   | 0.01                   | 0.01                   | 0.01                   | 0.01                   |
| mg/kg/dose | N     | 6     | 6     | 6     | 6     | 6     | 6     | 6                      | 6                      | 6                      | 6                      | 6                      | 6                      |
|            | %Diff | -45.1 | -50.4 | -43.6 | -67.2 | -71.9 | -45.5 | -56.25                 | -40.91                 | -13.33                 | -46.15                 | -21.43                 | -47.62                 |
| 4          | Mean  | 0.7   | 1.6   | 1.2   | 1.1   | 1.2   | 1.3   | 0.02                   | 0.02                   | 0.02                   | 0.02                   | 0.02                   | 0.02                   |
| 100        | SD    | 0.5   | 0.9   | 0.9   | 1.1   | 1.4   | 1.0   | 0.01                   | 0.02                   | 0.01                   | 0.01                   | 0.01                   | 0.01                   |
| mg/kg/dose | N     | 6     | 6     | 6     | 6     | 6     | 6     | 6                      | 6                      | 6                      | 6                      | 6                      | 6                      |
|            | %Diff | -15.7 | -22.8 | -33.6 | -52.2 | -37.7 | -56.2 | -37.50                 | -36.36                 | -6.67                  | -15.38                 | -28.57                 | -38.10                 |

[a] - Anova & Dunnett  
[a1] - Anova & Dunnett(Log)  
[a2] - Kruskal-Wallis & Dunnett on Ranks

Table 5 Summary of Hematology-Pretest and Dosing Phase (Cont'd)

Day(s) Relative to Start Date

| Sex: Male  |       | %BASO | %BASO | %BASO | %BASO | %BASO | %BASO | PLT                    | PLT                    | PLT                    | PLT                    | PLT                    | PLT                    |
|------------|-------|-------|-------|-------|-------|-------|-------|------------------------|------------------------|------------------------|------------------------|------------------------|------------------------|
|            |       | (%)   | (%)   | (%)   | (%)   | (%)   | (%)   | (x10 <sup>3</sup> /μL) | (x10 <sup>3</sup> /μL) | (x10 <sup>3</sup> /μL) | (x10 <sup>3</sup> /μL) | (x10 <sup>3</sup> /μL) | (x10 <sup>3</sup> /μL) |
|            |       | [a]   | [a]   | [a1]  | [a1]  | [a]   | [a]   | [a]                    | [a]                    | [a]                    | [a]                    | [a]                    | [a]                    |
|            |       | -11   | -6    | 53    | 87    | 123   | 179   | -11                    | -6                     | 53                     | 87                     | 123                    | 179                    |
| 1          | Mean  | 0.3   | 0.3   | 0.3   | 0.3   | 0.3   | 0.4   | 402                    | 410                    | 363                    | 338                    | 330                    | 338                    |
| 0          | SD    | 0.2   | 0.1   | 0.1   | 0.1   | 0.1   | 0.1   | 57                     | 45                     | 59                     | 36                     | 45                     | 42                     |
| mg/kg/dose | N     | 6     | 6     | 6     | 6     | 6     | 6     | 6                      | 6                      | 6                      | 6                      | 6                      | 6                      |
| 2          | Mean  | 0.3   | 0.2   | 0.2   | 0.2   | 0.3   | 0.3   | 383                    | 429                    | 358                    | 344                    | 327                    | 311                    |
| 5          | SD    | 0.1   | 0.1   | 0.0   | 0.0   | 0.1   | 0.1   | 76                     | 74                     | 57                     | 62                     | 52                     | 66                     |
| mg/kg/dose | N     | 6     | 6     | 6     | 6     | 6     | 6     | 6                      | 6                      | 6                      | 6                      | 6                      | 6                      |
|            | %Diff | 0.0   | -22.2 | -20.0 | -20.0 | 12.5  | -14.3 | -5                     | 5                      | -1                     | 2                      | -1                     | -8                     |
| 3          | Mean  | 0.1   | 0.2   | 0.2   | 0.2   | 0.2   | 0.2   | 411                    | 449                    | 371                    | 355                    | 345                    | 359                    |
| 25         | SD    | 0.1   | 0.1   | 0.1   | 0.1   | 0.1   | 0.1   | 90                     | 100                    | 86                     | 96                     | 95                     | 77                     |
| mg/kg/dose | N     | 6     | 6     | 6     | 6     | 6     | 6     | 6                      | 6                      | 6                      | 6                      | 6                      | 6                      |
|            | %Diff | -53.3 | -27.8 | -20.0 | -33.3 | -25.0 | -38.1 | 2                      | 10                     | 2                      | 5                      | 5                      | 6                      |
| 4          | Mean  | 0.2   | 0.2   | 0.2   | 0.2   | 0.2   | 0.3   | 396                    | 453                    | 386                    | 352                    | 342                    | 332                    |
| 100        | SD    | 0.1   | 0.1   | 0.1   | 0.1   | 0.1   | 0.1   | 69                     | 117                    | 80                     | 85                     | 69                     | 78                     |
| mg/kg/dose | N     | 6     | 6     | 6     | 6     | 6     | 6     | 6                      | 6                      | 6                      | 6                      | 6                      | 6                      |
|            | %Diff | -20.0 | -38.9 | -20.0 | -20.0 | -25.0 | -9.5  | -2                     | 11                     | 6                      | 4                      | 4                      | -2                     |

[a] - Anova & Dunnett

[a1] - Kruskal-Wallis & Dunnett on Ranks

Table 5 Summary of Hematology-Pretest and Dosing Phase (Cont'd)

Day(s) Relative to Start Date

| Sex: Male  |       | MPV  | MPV  | MPV  | MPV  | MPV  | MPV  |
|------------|-------|------|------|------|------|------|------|
|            |       | (fL) | (fL) | (fL) | (fL) | (fL) | (fL) |
|            |       | [a]  | [a]  | [a]  | [a]  | [a]  | [a]  |
|            |       | -11  | -6   | 53   | 87   | 123  | 179  |
| 1          | Mean  | 8.0  | 8.0  | 8.6  | 8.9  | 9.5  | 9.4  |
| 0          | SD    | 0.7  | 1.1  | 1.5  | 1.7  | 1.8  | 1.9  |
| mg/kg/dose | N     | 6    | 6    | 6    | 6    | 6    | 6    |
| 2          | Mean  | 7.8  | 7.6  | 8.3  | 8.3  | 9.1  | 9.2  |
| 5          | SD    | 1.3  | 1.2  | 1.6  | 1.7  | 1.8  | 1.8  |
| mg/kg/dose | N     | 6    | 6    | 6    | 6    | 6    | 6    |
|            | %Diff | -2.3 | -4.4 | -3.5 | -6.0 | -4.7 | -2.5 |
| 3          | Mean  | 7.8  | 7.5  | 8.1  | 8.4  | 9.3  | 9.2  |
| 25         | SD    | 2.0  | 1.8  | 2.4  | 2.4  | 3.1  | 2.4  |
| mg/kg/dose | N     | 6    | 6    | 6    | 6    | 6    | 6    |
|            | %Diff | -3.1 | -5.7 | -6.0 | -5.8 | -2.1 | -2.3 |
| 4          | Mean  | 7.6  | 7.6  | 8.1  | 8.2  | 8.9  | 8.8  |
| 100        | SD    | 0.9  | 0.9  | 0.9  | 1.0  | 1.0  | 1.0  |
| mg/kg/dose | N     | 6    | 6    | 6    | 6    | 6    | 6    |
|            | %Diff | -5.2 | -4.4 | -6.0 | -8.1 | -6.1 | -6.0 |

[a] - Anova &amp; Dunnett

Table 5 Summary of Hematology-Pretest and Dosing Phase (Cont'd)

Day(s) Relative to Start Date

| Sex: Female |       | WBC                    | WBC                    | WBC                    | WBC                    | WBC                    | WBC                    | RBC                    | RBC                    | RBC                    | RBC                    | RBC                    | RBC                    |
|-------------|-------|------------------------|------------------------|------------------------|------------------------|------------------------|------------------------|------------------------|------------------------|------------------------|------------------------|------------------------|------------------------|
|             |       | (x10 <sup>3</sup> /μL) | (x10 <sup>3</sup> /μL) | (x10 <sup>3</sup> /μL) | (x10 <sup>3</sup> /μL) | (x10 <sup>3</sup> /μL) | (x10 <sup>3</sup> /μL) | (x10 <sup>6</sup> /μL) | (x10 <sup>6</sup> /μL) | (x10 <sup>6</sup> /μL) | (x10 <sup>6</sup> /μL) | (x10 <sup>6</sup> /μL) | (x10 <sup>6</sup> /μL) |
|             |       | [a]                    | [a1]                   | [a2]                   | [a]                    | [a1]                   | [a1]                   | [a1]                   | [a1]                   | [a1]                   | [a1]                   | [a1]                   | [a1]                   |
|             |       | -12                    | -7                     | 52                     | 86                     | 122                    | 178                    | -12                    | -7                     | 52                     | 86                     | 122                    | 178                    |
| 1           | Mean  | 17.29                  | 13.88                  | 12.96                  | 10.39                  | 10.18                  | 8.66                   | 5.40                   | 5.19                   | 5.37                   | 5.39                   | 5.41                   | 5.31                   |
| 0           | SD    | 5.12                   | 4.78                   | 2.54                   | 1.97                   | 2.31                   | 2.69                   | 0.17                   | 0.21                   | 0.18                   | 0.37                   | 0.23                   | 0.24                   |
| mg/kg/dose  | N     | 6                      | 6                      | 6                      | 6                      | 6                      | 6                      | 6                      | 6                      | 6                      | 6                      | 6                      | 6                      |
| 2           | Mean  | 16.42                  | 12.45                  | 11.13                  | 11.00                  | 7.33                   | 8.37                   | 5.88                   | 5.61                   | 5.87                   | 5.82                   | 5.11                   | 5.61                   |
| 5           | SD    | 3.94                   | 1.74                   | 2.92                   | 3.83                   | 3.73                   | 2.07                   | 0.46                   | 0.46                   | 0.56                   | 0.58                   | 2.05                   | 0.47                   |
| mg/kg/dose  | N     | 6                      | 6                      | 6                      | 6                      | 6                      | 6                      | 6                      | 6                      | 6                      | 6                      | 6                      | 6                      |
|             | %Diff | -5.03                  | -10.31                 | -14.17                 | 5.92                   | -27.99                 | -3.44                  | 8.93                   | 7.96                   | 9.18                   | 7.94                   | -5.55                  | 5.78                   |
| 3           | Mean  | 11.73                  | 10.97                  | 7.44                   | 7.51                   | 7.72                   | 7.17                   | 5.57                   | 5.45                   | 5.60                   | 5.38                   | 5.64                   | 5.34                   |
| 25          | SD    | 2.66                   | 3.03                   | 4.66                   | 3.28                   | 2.53                   | 2.88                   | 0.28                   | 0.30                   | 0.24                   | 0.33                   | 0.38                   | 0.37                   |
| mg/kg/dose  | N     | 6                      | 6                      | 6                      | 6                      | 6                      | 6                      | 6                      | 6                      | 6                      | 6                      | 6                      | 6                      |
|             | %Diff | -32.17                 | -20.97                 | -42.63                 | -27.65                 | -24.14                 | -17.22                 | 3.15                   | 4.88                   | 4.25                   | -0.22                  | 4.35                   | 0.60                   |
| 4           | Mean  | 13.81                  | 10.30                  | 9.39                   | 11.37                  | 7.02                   | 9.15                   | 5.70                   | 5.58                   | 5.78                   | 5.80                   | 5.92                   | 5.67                   |
| 100         | SD    | 5.94                   | 4.09                   | 5.30                   | 6.41                   | 3.17                   | 5.00                   | 0.70                   | 0.68                   | 0.31                   | 0.47                   | 0.54                   | 0.60                   |
| mg/kg/dose  | N     | 6                      | 6                      | 6                      | 6                      | 6                      | 6                      | 6                      | 6                      | 6                      | 6                      | 6                      | 6                      |
|             | %Diff | -20.11                 | -25.83                 | -27.56                 | 9.52                   | -31.10                 | 5.64                   | 5.59                   | 7.51                   | 7.51                   | 7.45                   | 9.53                   | 6.85                   |

[a] - Anova & Dunnett(Log)  
[a1] - Anova & Dunnett  
[a2] - Kruskal-Wallis & Dunnett on Ranks

Table 5 Summary of Hematology-Pretest and Dosing Phase (Cont'd)

Day(s) Relative to Start Date

| Sex: Female |       | HGB    | HGB    | HGB    | HGB    | HGB    | HGB    | HCT  | HCT  | HCT  | HCT  | HCT  | HCT  |
|-------------|-------|--------|--------|--------|--------|--------|--------|------|------|------|------|------|------|
|             |       | (g/dL) | (g/dL) | (g/dL) | (g/dL) | (g/dL) | (g/dL) | (%)  | (%)  | (%)  | (%)  | (%)  | (%)  |
|             |       | [a]    | [a1]   | [a2]   | [a1]   | [a2]   | [a1]   | [a1] | [a2] | [a2] | [a1] | [a2] | [a1] |
|             |       | -12    | -7     | 52     | 86     | 122    | 178    | -12  | -7   | 52   | 86   | 122  | 178  |
| 1           | Mean  | 12.8   | 12.3   | 12.8   | 12.7   | 13.1   | 12.7   | 42.1 | 40.4 | 41.7 | 41.4 | 41.5 | 41.6 |
| 0           | SD    | 0.9    | 0.8    | 0.6    | 0.9    | 0.6    | 0.7    | 2.4  | 2.1  | 1.6  | 3.2  | 1.8  | 2.7  |
|             | N     | 6      | 6      | 6      | 6      | 6      | 6      | 6    | 6    | 6    | 6    | 6    | 6    |
| 2           | Mean  | 13.7   | 13.0   | 13.5   | 13.2   | 12.0   | 13.0   | 44.2 | 42.5 | 43.7 | 43.0 | 37.7 | 41.9 |
| 5           | SD    | 1.2    | 1.1    | 1.4    | 1.2    | 4.9    | 1.1    | 3.7  | 3.1  | 3.8  | 3.1  | 14.9 | 2.8  |
|             | N     | 6      | 6      | 6      | 6      | 6      | 6      | 6    | 6    | 6    | 6    | 6    | 6    |
|             | %Diff | 7.2    | 5.7    | 5.3    | 4.5    | -8.7   | 2.4    | 5.1  | 5.2  | 4.8  | 3.7  | -9.2 | 0.8  |
| 3           | Mean  | 13.0   | 12.9   | 13.3   | 12.5   | 13.4   | 12.8   | 43.3 | 42.9 | 43.6 | 41.4 | 43.5 | 41.7 |
| 25          | SD    | 0.5    | 0.4    | 0.4    | 0.8    | 0.6    | 0.8    | 2.0  | 1.2  | 1.3  | 2.8  | 2.3  | 2.7  |
|             | N     | 6      | 6      | 6      | 6      | 6      | 6      | 6    | 6    | 6    | 6    | 6    | 6    |
|             | %Diff | 1.8    | 5.2    | 3.5    | -1.6   | 2.4    | 0.7    | 3.0  | 6.2  | 4.5  | 0.0  | 4.7  | 0.2  |
| 4           | Mean  | 13.1   | 12.9   | 13.4   | 13.3   | 13.9   | 13.3   | 44.1 | 43.4 | 43.9 | 43.7 | 44.9 | 43.7 |
| 100         | SD    | 0.8    | 0.8    | 0.5    | 0.4    | 0.7    | 0.5    | 3.3  | 2.4  | 1.7  | 1.9  | 2.6  | 3.5  |
|             | N     | 6      | 6      | 6      | 6      | 6      | 6      | 6    | 6    | 6    | 6    | 6    | 6    |
|             | %Diff | 3.0    | 5.2    | 4.7    | 4.9    | 6.0    | 4.2    | 4.9  | 7.4  | 5.2  | 5.5  | 8.2  | 5.0  |

[a] - Anova & Dunnett(Log)  
 [a1] - Anova & Dunnett  
 [a2] - Kruskal-Wallis & Dunnett on Ranks

Table 5 Summary of Hematology-Pretest and Dosing Phase (Cont'd)

Day(s) Relative to Start Date

| Sex: Female |       | MCV  | MCV  | MCV  | MCV  | MCV  | MCV  | MCH  | MCH  | MCH  | MCH  | MCH  | MCH  |
|-------------|-------|------|------|------|------|------|------|------|------|------|------|------|------|
|             |       | (fL) | (fL) | (fL) | (fL) | (fL) | (fL) | (pg) | (pg) | (pg) | (pg) | (pg) | (pg) |
|             |       | [a]  | [a]  | [a]  | [a]  | [a]  | [a1] | [a]  | [a]  | [a]  | [a]  | [a]  | [a]  |
|             |       | -12  | -7   | 52   | 86   | 122  | 178  | -12  | -7   | 52   | 86   | 122  | 178  |
| 1           | Mean  | 77.8 | 77.7 | 77.7 | 76.8 | 76.8 | 78.4 | 23.6 | 23.6 | 23.9 | 23.5 | 24.2 | 24.0 |
| 0           | SD    | 2.9  | 1.2  | 2.7  | 2.3  | 2.5  | 2.0  | 0.9  | 0.8  | 0.7  | 0.8  | 0.7  | 0.7  |
| mg/kg/dose  | N     | 6    | 6    | 6    | 6    | 6    | 6    | 6    | 6    | 6    | 6    | 6    | 6    |
| 2           | Mean  | 75.3 | 75.9 | 74.7 | 74.0 | 73.9 | 74.8 | 23.3 | 23.2 | 23.1 | 22.8 | 23.2 | 23.3 |
| 5           | SD    | 5.0  | 4.7  | 4.6  | 3.9  | 4.1  | 5.4  | 1.6  | 1.5  | 1.5  | 1.5  | 2.0  | 1.8  |
| mg/kg/dose  | N     | 6    | 6    | 6    | 6    | 6    | 6    | 6    | 6    | 6    | 6    | 6    | 6    |
|             | %Diff | -3.2 | -2.3 | -3.9 | -3.6 | -3.8 | -4.5 | -1.4 | -1.6 | -3.4 | -3.2 | -4.4 | -2.8 |
| 3           | Mean  | 77.9 | 78.8 | 77.9 | 77.0 | 77.1 | 78.1 | 23.4 | 23.8 | 23.7 | 23.2 | 23.8 | 24.0 |
| 25          | SD    | 3.0  | 2.8  | 2.2  | 2.8  | 1.7  | 2.3  | 0.9  | 0.9  | 0.6  | 1.0  | 0.7  | 0.8  |
| mg/kg/dose  | N     | 6    | 6    | 6    | 6    | 6    | 6    | 6    | 6    | 6    | 6    | 6    | 6    |
|             | %Diff | 0.1  | 1.4  | 0.3  | 0.2  | 0.3  | -0.3 | -0.8 | 0.8  | -0.9 | -1.3 | -1.7 | 0.1  |
| 4           | Mean  | 77.9 | 78.3 | 76.2 | 75.7 | 76.2 | 77.3 | 23.2 | 23.3 | 23.2 | 23.0 | 23.6 | 23.6 |
| 100         | SD    | 5.9  | 6.6  | 5.5  | 5.7  | 7.1  | 6.0  | 1.7  | 1.8  | 1.6  | 1.8  | 1.9  | 2.0  |
| mg/kg/dose  | N     | 6    | 6    | 6    | 6    | 6    | 6    | 6    | 6    | 6    | 6    | 6    | 6    |
|             | %Diff | 0.1  | 0.8  | -1.9 | -1.4 | -0.7 | -1.3 | -1.7 | -1.1 | -2.7 | -2.1 | -2.6 | -1.7 |

[a] - Anova & Dunnett

[a1] - Kruskal-Wallis & Dunnett on Ranks



Table 5 Summary of Hematology-Pretest and Dosing Phase (Cont'd)

Day(s) Relative to Start Date

| Sex: Female |       | MCHC   | MCHC   | MCHC   | MCHC   | MCHC   | MCHC   | RDW  | RDW  | RDW  | RDW  | RDW  | RDW  |
|-------------|-------|--------|--------|--------|--------|--------|--------|------|------|------|------|------|------|
|             |       | (g/dL) | (g/dL) | (g/dL) | (g/dL) | (g/dL) | (g/dL) | (%)  | (%)  | (%)  | (%)  | (%)  | (%)  |
|             |       | [a]    | [a]    | [a]    | [a1]   | [a]    | [a]    | [a]  | [a]  | [a]  | [a]  | [a1] | [a]  |
|             |       | -12    | -7     | 52     | 86     | 122    | 178    | -12  | -7   | 52   | 86   | 122  | 178  |
| 1           | Mean  | 30.3   | 30.3   | 30.7   | 30.6   | 31.6   | 30.6   | 13.3 | 13.4 | 13.0 | 12.9 | 12.6 | 13.3 |
| 0           | SD    | 1.0    | 0.7    | 1.1    | 0.6    | 1.1    | 0.9    | 0.7  | 0.7  | 0.6  | 0.6  | 0.6  | 0.6  |
|             | N     | 6      | 6      | 6      | 6      | 6      | 6      | 6    | 6    | 6    | 6    | 6    | 6    |
| 2           | Mean  | 30.9   | 30.6   | 30.9   | 30.7   | 31.3   | 31.1   | 13.0 | 13.0 | 12.8 | 12.8 | 13.7 | 13.3 |
| 5           | SD    | 0.4    | 0.4    | 0.7    | 1.0    | 1.4    | 0.9    | 0.3  | 0.2  | 0.3  | 0.3  | 3.5  | 0.6  |
|             | N     | 6      | 6      | 6      | 6      | 6      | 6      | 6    | 6    | 6    | 6    | 6    | 6    |
|             | %Diff | 1.9    | 0.8    | 0.5    | 0.4    | -0.7   | 1.6    | -1.9 | -3.0 | -1.4 | -0.9 | 9.0  | -0.4 |
| 3           | Mean  | 30.0   | 30.2   | 30.4   | 30.2   | 30.9   | 30.8   | 13.1 | 13.1 | 12.8 | 12.9 | 12.4 | 13.1 |
| 25          | SD    | 0.8    | 0.8    | 0.8    | 1.2    | 0.9    | 0.8    | 0.5  | 0.4  | 0.6  | 0.4  | 0.4  | 0.6  |
|             | N     | 6      | 6      | 6      | 6      | 6      | 6      | 6    | 6    | 6    | 6    | 6    | 6    |
|             | %Diff | -0.9   | -0.5   | -1.0   | -1.3   | -2.0   | 0.4    | -1.5 | -2.2 | -1.4 | -0.5 | -1.2 | -2.0 |
| 4           | Mean  | 29.8   | 29.8   | 30.5   | 30.4   | 31.0   | 30.5   | 13.8 | 13.7 | 13.0 | 13.1 | 12.6 | 13.5 |
| 100         | SD    | 0.6    | 0.6    | 0.4    | 0.6    | 0.7    | 1.1    | 0.6  | 0.5  | 0.5  | 0.8  | 0.6  | 0.6  |
|             | N     | 6      | 6      | 6      | 6      | 6      | 6      | 6    | 6    | 6    | 6    | 6    | 6    |
|             | %Diff | -1.7   | -1.9   | -0.8   | -0.7   | -1.9   | -0.3   | 3.8  | 2.4  | 0.1  | 1.4  | 0.0  | 1.0  |

[a] - Anova & Dunnett

[a1] - Kruskal-Wallis & Dunnett on Ranks

Table 5 Summary of Hematology-Pretest and Dosing Phase (Cont'd)

Day(s) Relative to Start Date

| Sex: Female |       | #RET                  | #RET                  | #RET                  | #RET                  | #RET                  | #RET                  | #NEUT                  | #NEUT                  | #NEUT                  | #NEUT                  | #NEUT                  | #NEUT                  |
|-------------|-------|-----------------------|-----------------------|-----------------------|-----------------------|-----------------------|-----------------------|------------------------|------------------------|------------------------|------------------------|------------------------|------------------------|
|             |       | (x10 <sup>9</sup> /L) | (x10 <sup>9</sup> /L) | (x10 <sup>9</sup> /L) | (x10 <sup>9</sup> /L) | (x10 <sup>9</sup> /L) | (x10 <sup>9</sup> /L) | (x10 <sup>3</sup> /μL) | (x10 <sup>3</sup> /μL) | (x10 <sup>3</sup> /μL) | (x10 <sup>3</sup> /μL) | (x10 <sup>3</sup> /μL) | (x10 <sup>3</sup> /μL) |
|             |       | [a]                   | [a]                   | [a]                   | [a]                   | [a]                   | [a1]                  | [a2]                   | [a]                    | [a]                    | [a]                    | [a]                    | [a]                    |
|             |       | -12                   | -7                    | 52                    | 86                    | 122                   | 178                   | -12                    | -7                     | 52                     | 86                     | 122                    | 178                    |
| 1           | Mean  | 52.9                  | 69.1                  | 47.0                  | 56.0                  | 69.8                  | 55.9                  | 12.19                  | 8.74                   | 7.70                   | 6.41                   | 5.37                   | 4.11                   |
| 0           | SD    | 6.2                   | 18.5                  | 12.1                  | 17.7                  | 16.7                  | 8.4                   | 4.74                   | 4.48                   | 2.66                   | 1.88                   | 2.78                   | 3.03                   |
|             | N     | 6                     | 6                     | 6                     | 6                     | 6                     | 6                     | 6                      | 6                      | 6                      | 6                      | 6                      | 6                      |
| 2           | Mean  | 57.2                  | 81.6                  | 67.3                  | 63.3                  | 77.6                  | 70.1                  | 11.44                  | 7.07                   | 6.33                   | 7.03                   | 3.34                   | 3.66                   |
| 5           | SD    | 19.9                  | 31.6                  | 14.9                  | 16.6                  | 16.8                  | 14.7                  | 4.41                   | 2.12                   | 2.91                   | 4.13                   | 3.62                   | 1.25                   |
|             | N     | 6                     | 6                     | 6                     | 6                     | 6                     | 6                     | 6                      | 6                      | 6                      | 6                      | 6                      | 6                      |
|             | %Diff | 8.2                   | 18.0                  | 43.2                  | 13.0                  | 11.1                  | 25.4                  | -6.22                  | -19.14                 | -17.77                 | 9.65                   | -37.85                 | -10.98                 |
| 3           | Mean  | 45.6                  | 66.5                  | 49.3                  | 53.9                  | 64.3                  | 61.6                  | 7.04                   | 5.79                   | 2.92                   | 3.71                   | 3.01                   | 2.24                   |
| 25          | SD    | 8.4                   | 20.7                  | 16.0                  | 16.9                  | 12.2                  | 17.9                  | 2.04                   | 2.50                   | 2.52                   | 2.27                   | 1.51                   | 1.03                   |
|             | N     | 6                     | 6                     | 6                     | 6                     | 6                     | 6                     | 6                      | 6                      | 6                      | 6                      | 6                      | 6                      |
|             | %Diff | -13.8                 | -3.8                  | 4.8                   | -3.7                  | -7.9                  | 10.1                  | -42.26                 | -33.78                 | -62.07                 | -42.10                 | -43.93                 | -45.54                 |
| 4           | Mean  | 75.9                  | 92.2                  | 57.6                  | 59.4                  | 67.5                  | 64.9                  | 9.59                   | 5.21                   | 4.57                   | 7.18                   | 2.82                   | 4.71                   |
| 100         | SD    | 38.4                  | 43.7                  | 21.0                  | 23.3                  | 21.6                  | 26.5                  | 5.27                   | 2.37                   | 3.61                   | 4.49                   | 2.23                   | 2.88                   |
|             | N     | 6                     | 6                     | 6                     | 6                     | 6                     | 6                     | 6                      | 6                      | 6                      | 6                      | 6                      | 6                      |
|             | %Diff | 43.6                  | 33.4                  | 22.5                  | 6.1                   | -3.3                  | 16.1                  | -21.36                 | -40.43                 | -40.68                 | 11.96                  | -47.53                 | 14.47                  |

[a] - Anova &amp; Dunnett

[a1] - Anova &amp; Dunnett(Log)

[a2] - Kruskal-Wallis &amp; Dunnett on Ranks

Table 5 Summary of Hematology-Pretest and Dosing Phase (Cont'd)

Day(s) Relative to Start Date

| Sex: Female |       | %NEUT | %NEUT | %NEUT | %NEUT | %NEUT | %NEUT | #LYMP                  | #LYMP                  | #LYMP                  | #LYMP                  | #LYMP                  | #LYMP                  |
|-------------|-------|-------|-------|-------|-------|-------|-------|------------------------|------------------------|------------------------|------------------------|------------------------|------------------------|
|             |       | (%)   | (%)   | (%)   | (%)   | (%)   | (%)   | (x10 <sup>3</sup> /μL) | (x10 <sup>3</sup> /μL) | (x10 <sup>3</sup> /μL) | (x10 <sup>3</sup> /μL) | (x10 <sup>3</sup> /μL) | (x10 <sup>3</sup> /μL) |
|             |       | [a]   | [a]   | [a]   | [a]   | [a]   | [a]   | [a]                    | [a]                    | [a]                    | [a]                    | [a]                    | [a]                    |
|             |       | -12   | -7    | 52    | 86    | 122   | 178   | -12                    | -7                     | 52                     | 86                     | 122                    | 178                    |
| 1           | Mean  | 69.0  | 60.2  | 58.3  | 61.0  | 50.0  | 44.4  | 4.55                   | 4.49                   | 4.68                   | 3.55                   | 4.31                   | 4.05                   |
| 0           | SD    | 8.6   | 13.5  | 10.3  | 8.5   | 17.1  | 18.4  | 1.02                   | 1.08                   | 1.09                   | 0.62                   | 0.84                   | 1.07                   |
|             | N     | 6     | 6     | 6     | 6     | 6     | 6     | 6                      | 6                      | 6                      | 6                      | 6                      | 6                      |
| 2           | Mean  | 67.9  | 56.2  | 55.1  | 61.2  | 38.9  | 44.1  | 4.32                   | 4.70                   | 4.30                   | 3.56                   | 3.65                   | 4.34                   |
| 5           | SD    | 12.3  | 12.7  | 12.1  | 12.5  | 19.5  | 10.2  | 1.45                   | 1.22                   | 0.90                   | 0.91                   | 1.16                   | 1.39                   |
|             | N     | 6     | 6     | 6     | 6     | 6     | 6     | 6                      | 6                      | 6                      | 6                      | 6                      | 6                      |
|             | %Diff | -1.6  | -6.7  | -5.5  | 0.2   | -22.3 | -0.8  | -5.02                  | 4.75                   | -8.08                  | 0.23                   | -15.33                 | 6.99                   |
| 3           | Mean  | 59.5  | 51.0  | 35.3* | 47.3  | 38.2  | 31.4  | 4.17                   | 4.71                   | 4.07                   | 3.42                   | 4.31                   | 4.52                   |
| 25          | SD    | 8.1   | 11.8  | 13.9  | 15.5  | 13.5  | 9.6   | 1.16                   | 1.15                   | 2.48                   | 1.51                   | 1.82                   | 1.93                   |
|             | N     | 6     | 6     | 6     | 6     | 6     | 6     | 6                      | 6                      | 6                      | 6                      | 6                      | 6                      |
|             | %Diff | -13.8 | -15.3 | -39.4 | -22.4 | -23.7 | -29.4 | -8.32                  | 4.79                   | -13.07                 | -3.66                  | 0.08                   | 11.56                  |
| 4           | Mean  | 67.8  | 50.7  | 42.9  | 60.9  | 37.0  | 49.4  | 3.76                   | 4.58                   | 4.30                   | 3.76                   | 3.87                   | 4.04                   |
| 100         | SD    | 14.7  | 10.7  | 15.1  | 12.6  | 14.3  | 12.8  | 1.86                   | 2.10                   | 1.73                   | 1.87                   | 1.72                   | 2.14                   |
|             | N     | 6     | 6     | 6     | 6     | 6     | 6     | 6                      | 6                      | 6                      | 6                      | 6                      | 6                      |
|             | %Diff | -1.8  | -15.8 | -26.5 | -0.2  | -26.0 | 11.1  | -17.41                 | 2.08                   | -8.19                  | 5.82                   | -10.10                 | -0.29                  |

[a] - Anova &amp; Dunnett: \* = p ≤ 0.05

Table 5 Summary of Hematology-Pretest and Dosing Phase (Cont'd)

Day(s) Relative to Start Date

| Sex: Female |       | %LYMP | %LYMP | %LYMP | %LYMP | %LYMP | %LYMP | #MONO                  | #MONO                  | #MONO                  | #MONO                  | #MONO                  | #MONO                  |
|-------------|-------|-------|-------|-------|-------|-------|-------|------------------------|------------------------|------------------------|------------------------|------------------------|------------------------|
|             |       | (%)   | (%)   | (%)   | (%)   | (%)   | (%)   | (x10 <sup>3</sup> /μL) | (x10 <sup>3</sup> /μL) | (x10 <sup>3</sup> /μL) | (x10 <sup>3</sup> /μL) | (x10 <sup>3</sup> /μL) | (x10 <sup>3</sup> /μL) |
|             |       | [a]   | [a]   | [a]   | [a]   | [a]   | [a]   | [a]                    | [a]                    | [a]                    | [a]                    | [a]                    | [a]                    |
|             |       | -12   | -7    | 52    | 86    | 122   | 178   | -12                    | -7                     | 52                     | 86                     | 122                    | 178                    |
| 1           | Mean  | 27.8  | 35.1  | 37.1  | 35.0  | 45.2  | 49.6  | 0.27                   | 0.30                   | 0.37                   | 0.28                   | 0.33                   | 0.31                   |
| 0           | SD    | 8.4   | 13.3  | 9.4   | 7.7   | 17.0  | 16.6  | 0.10                   | 0.17                   | 0.19                   | 0.13                   | 0.26                   | 0.18                   |
| mg/kg/dose  | N     | 6     | 6     | 6     | 6     | 6     | 6     | 6                      | 6                      | 6                      | 6                      | 6                      | 6                      |
| 2           | Mean  | 27.7  | 38.3  | 40.1  | 34.9  | 56.0  | 51.4  | 0.33                   | 0.25                   | 0.33                   | 0.29                   | 0.22                   | 0.26                   |
| 5           | SD    | 10.6  | 10.8  | 10.8  | 12.0  | 19.1  | 9.8   | 0.11                   | 0.07                   | 0.11                   | 0.07                   | 0.08                   | 0.08                   |
| mg/kg/dose  | N     | 6     | 6     | 6     | 6     | 6     | 6     | 6                      | 6                      | 6                      | 6                      | 6                      | 6                      |
|             | %Diff | -0.5  | 9.0   | 8.3   | -0.2  | 23.9  | 3.5   | 23.60                  | -15.73                 | -10.45                 | 2.99                   | -35.50                 | -18.09                 |
| 3           | Mean  | 35.7  | 44.1  | 58.0* | 47.3  | 56.4  | 62.7  | 0.27                   | 0.26                   | 0.29                   | 0.26                   | 0.27                   | 0.30                   |
| 25          | SD    | 6.2   | 9.1   | 13.1  | 14.7  | 13.2  | 8.5   | 0.10                   | 0.11                   | 0.15                   | 0.12                   | 0.07                   | 0.15                   |
| mg/kg/dose  | N     | 6     | 6     | 6     | 6     | 6     | 6     | 6                      | 6                      | 6                      | 6                      | 6                      | 6                      |
|             | %Diff | 28.4  | 25.6  | 56.5  | 35.3  | 25.0  | 26.4  | 0.62                   | -13.48                 | -21.82                 | -7.19                  | -20.00                 | -5.85                  |
| 4           | Mean  | 28.8  | 44.3  | 51.1  | 35.1  | 57.7  | 45.7  | 0.24                   | 0.23                   | 0.23                   | 0.25                   | 0.19                   | 0.27                   |
| 100         | SD    | 13.7  | 10.2  | 13.8  | 11.4  | 13.0  | 11.9  | 0.11                   | 0.07                   | 0.07                   | 0.13                   | 0.06                   | 0.11                   |
| mg/kg/dose  | N     | 6     | 6     | 6     | 6     | 6     | 6     | 6                      | 6                      | 6                      | 6                      | 6                      | 6                      |
|             | %Diff | 3.6   | 26.1  | 37.8  | 0.3   | 27.8  | -7.9  | -9.94                  | -23.60                 | -37.73                 | -10.18                 | -42.50                 | -14.36                 |

[a] - Anova & Dunnett: \* = p ≤ 0.05

Table 5 Summary of Hematology-Pretest and Dosing Phase (Cont'd)

Day(s) Relative to Start Date

| Sex: Female |       | %MONO | %MONO | %MONO | %MONO | %MONO | %MONO | #EOS                   | #EOS                   | #EOS                   | #EOS                   | #EOS                   | #EOS                   |
|-------------|-------|-------|-------|-------|-------|-------|-------|------------------------|------------------------|------------------------|------------------------|------------------------|------------------------|
|             |       | (%)   | (%)   | (%)   | (%)   | (%)   | (%)   | (x10 <sup>3</sup> /μL) | (x10 <sup>3</sup> /μL) | (x10 <sup>3</sup> /μL) | (x10 <sup>3</sup> /μL) | (x10 <sup>3</sup> /μL) | (x10 <sup>3</sup> /μL) |
|             |       | [a]   | [a1]  | [a]   | [a]   | [a]   | [a]   | [a]                    | [a]                    | [a1]                   | [a1]                   | [a]                    | [a]                    |
|             |       | -12   | -7    | 52    | 86    | 122   | 178   | -12                    | -7                     | 52                     | 86                     | 122                    | 178                    |
| 1           | Mean  | 1.6   | 2.1   | 2.9   | 2.6   | 3.1   | 3.6   | 0.18                   | 0.27                   | 0.13                   | 0.08                   | 0.10                   | 0.13                   |
| 0           | SD    | 0.4   | 0.6   | 1.4   | 1.0   | 1.7   | 1.9   | 0.12                   | 0.33                   | 0.05                   | 0.04                   | 0.04                   | 0.13                   |
| mg/kg/dose  | N     | 6     | 6     | 6     | 6     | 6     | 6     | 6                      | 6                      | 6                      | 6                      | 6                      | 6                      |
| 2           | Mean  | 2.1   | 2.0   | 3.2   | 2.7   | 3.2   | 3.2   | 0.23                   | 0.33                   | 0.08                   | 0.06                   | 0.07                   | 0.05                   |
| 5           | SD    | 0.9   | 0.6   | 1.3   | 0.9   | 0.9   | 1.0   | 0.18                   | 0.32                   | 0.07                   | 0.03                   | 0.08                   | 0.04                   |
| mg/kg/dose  | N     | 6     | 6     | 6     | 6     | 6     | 6     | 6                      | 6                      | 6                      | 6                      | 6                      | 6                      |
|             | %Diff | 36.6  | -2.4  | 9.2   | 3.2   | 2.7   | -11.5 | 27.78                  | 22.64                  | -38.46                 | -19.15                 | -30.51                 | -58.97                 |
| 3           | Mean  | 2.5   | 2.7   | 4.2   | 3.6   | 3.6   | 4.2   | 0.14                   | 0.14                   | 0.09                   | 0.05                   | 0.07                   | 0.05                   |
| 25          | SD    | 1.3   | 1.9   | 1.3   | 1.4   | 1.1   | 1.7   | 0.13                   | 0.07                   | 0.06                   | 0.04                   | 0.02                   | 0.03                   |
| mg/kg/dose  | N     | 6     | 6     | 6     | 6     | 6     | 6     | 6                      | 6                      | 6                      | 6                      | 6                      | 6                      |
|             | %Diff | 58.1  | 29.0  | 46.2  | 38.0  | 16.8  | 15.2  | -22.22                 | -49.06                 | -33.33                 | -40.43                 | -33.90                 | -58.97                 |
| 4           | Mean  | 1.8   | 2.3   | 3.0   | 2.3   | 3.2   | 3.2   | 0.14                   | 0.18                   | 0.21                   | 0.12                   | 0.06                   | 0.07                   |
| 100         | SD    | 0.5   | 0.5   | 1.7   | 0.7   | 1.4   | 1.2   | 0.11                   | 0.18                   | 0.28                   | 0.12                   | 0.06                   | 0.06                   |
| mg/kg/dose  | N     | 6     | 6     | 6     | 6     | 6     | 6     | 6                      | 6                      | 6                      | 6                      | 6                      | 6                      |
|             | %Diff | 15.1  | 12.1  | 4.6   | -12.7 | 2.2   | -11.1 | -20.37                 | -32.70                 | 60.26                  | 46.81                  | -40.68                 | -47.44                 |

[a] - Anova &amp; Dunnett

[a1] - Anova &amp; Dunnett(Log)

Table 5 Summary of Hematology-Pretest and Dosing Phase (Cont'd)

Day(s) Relative to Start Date

| Sex: Female |       | %EOS | %EOS  | %EOS  | %EOS  | %EOS  | %EOS  | #BASO                  | #BASO                  | #BASO                  | #BASO                  | #BASO                  | #BASO                  |
|-------------|-------|------|-------|-------|-------|-------|-------|------------------------|------------------------|------------------------|------------------------|------------------------|------------------------|
|             |       | (%)  | (%)   | (%)   | (%)   | (%)   | (%)   | (x10 <sup>3</sup> /μL) | (x10 <sup>3</sup> /μL) | (x10 <sup>3</sup> /μL) | (x10 <sup>3</sup> /μL) | (x10 <sup>3</sup> /μL) | (x10 <sup>3</sup> /μL) |
|             |       | [a]  | [a]   | [a]   | [a1]  | [a2]  | [a]   | [a]                    | [a]                    | [a]                    | [a2]                   | [a]                    | [a]                    |
|             |       | -12  | -7    | 52    | 86    | 122   | 178   | -12                    | -7                     | 52                     | 86                     | 122                    | 178                    |
| 1           | Mean  | 1.0  | 1.9   | 1.1   | 0.8   | 1.0   | 1.7   | 0.03                   | 0.02                   | 0.02                   | 0.02                   | 0.02                   | 0.02                   |
| 0           | SD    | 0.5  | 2.1   | 0.5   | 0.3   | 0.5   | 1.8   | 0.01                   | 0.01                   | 0.01                   | 0.01                   | 0.01                   | 0.01                   |
| mg/kg/dose  | N     | 6    | 6     | 6     | 6     | 6     | 6     | 6                      | 6                      | 6                      | 6                      | 6                      | 6                      |
| 2           | Mean  | 1.6  | 2.7   | 0.8   | 0.6   | 1.0   | 0.6   | 0.03                   | 0.02                   | 0.02                   | 0.02                   | 0.02                   | 0.02                   |
| 5           | SD    | 1.4  | 2.7   | 0.8   | 0.3   | 1.2   | 0.5   | 0.02                   | 0.01                   | 0.01                   | 0.01                   | 0.01                   | 0.02                   |
| mg/kg/dose  | N     | 6    | 6     | 6     | 6     | 6     | 6     | 6                      | 6                      | 6                      | 6                      | 6                      | 6                      |
|             | %Diff | 56.5 | 40.5  | -25.0 | -17.8 | -8.1  | -64.7 | 13.33                  | 18.18                  | 7.69                   | 11.11                  | -10.00                 | 40.00                  |
| 3           | Mean  | 1.3  | 1.4   | 1.4   | 0.6   | 0.8   | 0.7   | 0.02                   | 0.02                   | 0.02                   | 0.01                   | 0.02                   | 0.02                   |
| 25          | SD    | 1.4  | 1.0   | 1.2   | 0.4   | 0.3   | 0.2   | 0.01                   | 0.01                   | 0.02                   | 0.01                   | 0.01                   | 0.01                   |
| mg/kg/dose  | N     | 6    | 6     | 6     | 6     | 6     | 6     | 6                      | 6                      | 6                      | 6                      | 6                      | 6                      |
|             | %Diff | 29.0 | -27.6 | 32.8  | -24.4 | -21.0 | -56.9 | -13.33                 | 9.09                   | -7.69                  | -11.11                 | 10.00                  | 10.00                  |
| 4           | Mean  | 1.0  | 1.6   | 1.9   | 1.2   | 0.9   | 1.0   | 0.02                   | 0.02                   | 0.02                   | 0.02                   | 0.02                   | 0.02                   |
| 100         | SD    | 0.7  | 1.5   | 1.9   | 1.4   | 0.9   | 1.2   | 0.01                   | 0.01                   | 0.01                   | 0.02                   | 0.01                   | 0.02                   |
| mg/kg/dose  | N     | 6    | 6     | 6     | 6     | 6     | 6     | 6                      | 6                      | 6                      | 6                      | 6                      | 6                      |
|             | %Diff | -8.1 | -16.4 | 78.1  | 60.0  | -12.9 | -43.1 | -26.67                 | 0.00                   | -15.38                 | 22.22                  | 0.00                   | 20.00                  |

[a] - Anova & Dunnett  
[a1] - Anova & Dunnett(Log)  
[a2] - Kruskal-Wallis & Dunnett on Ranks

Table 5 Summary of Hematology-Pretest and Dosing Phase (Cont'd)

Day(s) Relative to Start Date

| Sex: Female |       | %BASO | %BASO | %BASO | %BASO | %BASO | %BASO | PLT                    | PLT                    | PLT                    | PLT                    | PLT                    | PLT                    |
|-------------|-------|-------|-------|-------|-------|-------|-------|------------------------|------------------------|------------------------|------------------------|------------------------|------------------------|
|             |       | (%)   | (%)   | (%)   | (%)   | (%)   | (%)   | (x10 <sup>3</sup> /μL) | (x10 <sup>3</sup> /μL) | (x10 <sup>3</sup> /μL) | (x10 <sup>3</sup> /μL) | (x10 <sup>3</sup> /μL) | (x10 <sup>3</sup> /μL) |
|             |       | [a]   | [a]   | [a]   | [a]   | [a]   | [a]   | [a1]                   | [a]                    | [a]                    | [a]                    | [a]                    | [a]                    |
|             |       | -12   | -7    | 52    | 86    | 122   | 178   | -12                    | -7                     | 52                     | 86                     | 122                    | 178                    |
| 1           | Mean  | 0.2   | 0.2   | 0.2   | 0.2   | 0.2   | 0.2   | 558                    | 539                    | 459                    | 420                    | 419                    | 428                    |
| 0           | SD    | 0.1   | 0.1   | 0.1   | 0.1   | 0.1   | 0.1   | 71                     | 118                    | 89                     | 78                     | 91                     | 59                     |
| mg/kg/dose  | N     | 6     | 6     | 6     | 6     | 6     | 6     | 6                      | 6                      | 6                      | 6                      | 6                      | 6                      |
| 2           | Mean  | 0.2   | 0.2   | 0.2   | 0.2   | 0.2   | 0.3   | 421 *                  | 433                    | 362                    | 324                    | 308                    | 345                    |
| 5           | SD    | 0.1   | 0.0   | 0.1   | 0.1   | 0.1   | 0.2   | 141                    | 97                     | 92                     | 67                     | 124                    | 73                     |
| mg/kg/dose  | N     | 6     | 6     | 6     | 6     | 6     | 6     | 6                      | 6                      | 6                      | 6                      | 6                      | 6                      |
|             | %Diff | 22.2  | 22.2  | 33.3  | -10.0 | 0.0   | 14.3  | -25                    | -20                    | -21                    | -23                    | -26                    | -20                    |
| 3           | Mean  | 0.2   | 0.2   | 0.3   | 0.2   | 0.3   | 0.2   | 423 *                  | 485                    | 388                    | 358                    | 397                    | 352                    |
| 25          | SD    | 0.0   | 0.1   | 0.1   | 0.1   | 0.1   | 0.1   | 60                     | 109                    | 57                     | 39                     | 53                     | 52                     |
| mg/kg/dose  | N     | 6     | 6     | 6     | 6     | 6     | 6     | 6                      | 6                      | 6                      | 6                      | 6                      | 6                      |
|             | %Diff | 22.2  | 22.2  | 66.7  | 0.0   | 25.0  | 0.0   | -24                    | -10                    | -16                    | -15                    | -5                     | -18                    |
| 4           | Mean  | 0.2   | 0.2   | 0.2   | 0.2   | 0.2   | 0.2   | 422 *                  | 437                    | 372                    | 355                    | 373                    | 365                    |
| 100         | SD    | 0.1   | 0.1   | 0.0   | 0.1   | 0.1   | 0.1   | 96                     | 81                     | 58                     | 85                     | 72                     | 70                     |
| mg/kg/dose  | N     | 6     | 6     | 6     | 6     | 6     | 6     | 6                      | 6                      | 6                      | 6                      | 6                      | 6                      |
|             | %Diff | 11.1  | 0.0   | 44.4  | -10.0 | 8.3   | -14.3 | -24                    | -19                    | -19                    | -16                    | -11                    | -15                    |

[a] - Anova &amp; Dunnett

[a1] - Kruskal-Wallis &amp; Dunnett on Ranks: \* = p ≤ 0.05

Table 5 Summary of Hematology-Pretest and Dosing Phase (Cont'd)

Day(s) Relative to Start Date

| Sex: Female |       | MPV  | MPV  | MPV  | MPV  | MPV  | MPV  |
|-------------|-------|------|------|------|------|------|------|
|             |       | (fL) | (fL) | (fL) | (fL) | (fL) | (fL) |
|             |       | [a]  | [a]  | [a]  | [a]  | [a]  | [a]  |
|             |       | -12  | -7   | 52   | 86   | 122  | 178  |
| 1           | Mean  | 7.1  | 7.1  | 7.8  | 7.8  | 8.7  | 8.5  |
| 0           | SD    | 0.7  | 0.8  | 1.1  | 1.0  | 1.6  | 1.0  |
| mg/kg/dose  | N     | 6    | 6    | 6    | 6    | 6    | 6    |
| 2           | Mean  | 7.8  | 7.4  | 8.5  | 8.3  | 9.1  | 9.4  |
| 5           | SD    | 0.8  | 0.7  | 1.0  | 0.9  | 0.6  | 1.0  |
| mg/kg/dose  | N     | 6    | 6    | 6    | 6    | 6    | 6    |
|             | %Diff | 9.1  | 4.2  | 8.3  | 7.1  | 4.2  | 10.4 |
| 3           | Mean  | 7.7  | 7.6  | 8.8  | 8.6  | 9.2  | 9.6  |
| 25          | SD    | 0.6  | 0.5  | 1.2  | 0.7  | 0.9  | 0.7  |
| mg/kg/dose  | N     | 6    | 6    | 6    | 6    | 6    | 6    |
|             | %Diff | 8.2  | 6.8  | 12.8 | 10.3 | 5.5  | 12.1 |
| 4           | Mean  | 8.0  | 7.8  | 8.4  | 8.7  | 9.5  | 9.7  |
| 100         | SD    | 0.8  | 0.7  | 0.8  | 0.9  | 1.3  | 0.9  |
| mg/kg/dose  | N     | 6    | 6    | 6    | 6    | 6    | 6    |
|             | %Diff | 11.7 | 9.9  | 7.7  | 11.1 | 9.2  | 13.3 |

[a] - Anova &amp; Dunnett



Table 5 Summary of Hematology-Recovery Phase

Day: 209 Relative to Start Date

| Sex: Female            |       | WBC                    | RBC                    | HGB    | HCT  | MCV   | MCH  | MCHC   | RDW  | #RET                  | #NEUT                  | %NEUT | #LYMP                  |
|------------------------|-------|------------------------|------------------------|--------|------|-------|------|--------|------|-----------------------|------------------------|-------|------------------------|
|                        |       | (x10 <sup>3</sup> /μL) | (x10 <sup>6</sup> /μL) | (g/dL) | (%)  | (fL)  | (pg) | (g/dL) | (%)  | (x10 <sup>9</sup> /L) | (x10 <sup>3</sup> /μL) | (%)   | (x10 <sup>3</sup> /μL) |
| 1<br>0<br>mg/kg/dose   | Mean  | 9.77                   | 5.25                   | 12.9   | 43.0 | 82.0  | 24.7 | 30.1   | 13.5 | 68.6                  | 4.69                   | 49.5  | 4.68                   |
|                        | SD    | 1.29                   | 0.04                   | 0.4    | 0.1  | 1.1   | 1.1  | 0.9    | 0.7  | 3.4                   | 1.50                   | 21.8  | 2.64                   |
|                        | N     | 2                      | 2                      | 2      | 2    | 2     | 2    | 2      | 2    | 2                     | 2                      | 2     | 2                      |
| 2<br>5<br>mg/kg/dose   | Mean  | 10.63                  | 6.20                   | 14.2   | 44.8 | 72.2  | 22.8 | 31.6   | 14.0 | 65.9                  | 4.44                   | 41.9  | 5.64                   |
|                        | SD    | 3.19                   | 0.49                   | 1.6    | 4.2  | 1.0   | 0.8  | 0.6    | 0.6  | 10.2                  | 1.24                   | 0.8   | 1.68                   |
|                        | N     | 2                      | 2                      | 2      | 2    | 2     | 2    | 2      | 2    | 2                     | 2                      | 2     | 2                      |
|                        | %Diff | 8.75                   | 18.00                  | 9.7    | 4.1  | -11.9 | -7.5 | 5.0    | 3.3  | -3.9                  | -5.33                  | -15.3 | 20.64                  |
| 3<br>25<br>mg/kg/dose  | Mean  | 5.35                   | 5.48                   | 13.3   | 43.9 | 80.3  | 24.3 | 30.3   | 12.7 | 72.2                  | 2.08                   | 39.0  | 2.84                   |
|                        | SD    | 0.25                   | 0.47                   | 1.3    | 3.1  | 1.3   | 0.1  | 0.6    | 0.1  | 7.1                   | 0.16                   | 4.9   | 0.29                   |
|                        | N     | 2                      | 2                      | 2      | 2    | 2     | 2    | 2      | 2    | 2                     | 2                      | 2     | 2                      |
|                        | %Diff | -45.29                 | 4.29                   | 3.1    | 2.1  | -2.0  | -1.4 | 0.7    | -6.3 | 5.2                   | -55.76                 | -21.2 | -39.36                 |
| 4<br>100<br>mg/kg/dose | Mean  | 6.25                   | 5.63                   | 13.3   | 44.1 | 78.3  | 23.7 | 30.2   | 13.3 | 60.7                  | 3.13                   | 49.6  | 2.90                   |
|                        | SD    | 1.96                   | 0.21                   | 0.7    | 3.2  | 2.8   | 0.2  | 0.7    | 0.3  | 16.1                  | 1.14                   | 2.7   | 0.88                   |
|                        | N     | 2                      | 2                      | 2      | 2    | 2     | 2    | 2      | 2    | 2                     | 2                      | 2     | 2                      |
|                        | %Diff | -36.08                 | 7.14                   | 3.1    | 2.4  | -4.5  | -4.1 | 0.5    | -1.5 | -11.6                 | -33.37                 | 0.3   | -37.97                 |

Table 5 Summary of Hematology-Recovery Phase (Cont'd)

Day: 209 Relative to Start Date

| Sex: Female |       | %LYMP | #MONO                  | %MONO | #EOS                   | %EOS  | #BASO                  | %BASO | PLT                    | MPV  |
|-------------|-------|-------|------------------------|-------|------------------------|-------|------------------------|-------|------------------------|------|
|             |       | (%)   | (x10 <sup>3</sup> /μL) | (%)   | (x10 <sup>3</sup> /μL) | (%)   | (x10 <sup>3</sup> /μL) | (%)   | (x10 <sup>3</sup> /μL) | (fL) |
| 1           | Mean  | 46.5  | 0.25                   | 2.6   | 0.11                   | 1.0   | 0.03                   | 0.2   | 387                    | 8.4  |
| 0           | SD    | 20.9  | 0.04                   | 0.1   | 0.08                   | 0.7   | 0.01                   | 0.0   | 87                     | 0.4  |
| mg/kg/dose  | N     | 2     | 2                      | 2     | 2                      | 2     | 2                      | 2     | 2                      | 2    |
| 2           | Mean  | 53.1  | 0.42                   | 3.9   | 0.07                   | 0.6   | 0.04                   | 0.4   | 352                    | 9.0  |
| 5           | SD    | 0.1   | 0.16                   | 0.4   | 0.06                   | 0.4   | 0.03                   | 0.1   | 126                    | 0.4  |
| mg/kg/dose  | N     | 2     | 2                      | 2     | 2                      | 2     | 2                      | 2     | 2                      | 2    |
|             | %Diff | 14.2  | 66.00                  | 51.0  | -38.10                 | -40.0 | 60.00                  | 100.0 | -9                     | 6.5  |
| 3           | Mean  | 53.0  | 0.35                   | 6.4   | 0.05                   | 0.9   | 0.02                   | 0.3   | 359                    | 8.4  |
| 25          | SD    | 3.1   | 0.15                   | 2.4   | 0.03                   | 0.6   | 0.01                   | 0.1   | 52                     | 0.4  |
| mg/kg/dose  | N     | 2     | 2                      | 2     | 2                      | 2     | 2                      | 2     | 2                      | 2    |
|             | %Diff | 14.0  | 38.00                  | 151.0 | -52.38                 | -10.0 | -40.00                 | 25.0  | -7                     | 0.0  |
| 4           | Mean  | 46.5  | 0.15                   | 2.7   | 0.03                   | 0.5   | 0.01                   | 0.2   | 318                    | 9.5  |
| 100         | SD    | 0.5   | 0.01                   | 1.1   | 0.02                   | 0.6   | 0.00                   | 0.1   | 1                      | 0.2  |
| mg/kg/dose  | N     | 2     | 2                      | 2     | 2                      | 2     | 2                      | 2     | 2                      | 2    |
|             | %Diff | -0.1  | -40.00                 | 3.9   | -76.19                 | -50.0 | -60.00                 | -25.0 | -18                    | 12.5 |

Table 5 Summary of Hematology-Recovery Phase (Cont'd)

Day: 210 Relative to Start Date

| Sex: Male              |       | WBC                    | RBC                    | HGB    | HCT  | MCV  | MCH  | MCHC   | RDW  | #RET                  | #NEUT                  | %NEUT | #LYMP                  |
|------------------------|-------|------------------------|------------------------|--------|------|------|------|--------|------|-----------------------|------------------------|-------|------------------------|
|                        |       | (x10 <sup>3</sup> /μL) | (x10 <sup>6</sup> /μL) | (g/dL) | (%)  | (fL) | (pg) | (g/dL) | (%)  | (x10 <sup>9</sup> /L) | (x10 <sup>3</sup> /μL) | (%)   | (x10 <sup>3</sup> /μL) |
| 1<br>0<br>mg/kg/dose   | Mean  | 11.16                  | 5.88                   | 13.6   | 45.8 | 78.0 | 23.1 | 29.6   | 14.4 | 74.2                  | 3.94                   | 35.0  | 6.22                   |
|                        | SD    | 1.02                   | 0.11                   | 0.4    | 2.3  | 2.5  | 0.1  | 0.8    | 0.3  | 22.1                  | 1.07                   | 6.4   | 0.45                   |
|                        | N     | 2                      | 2                      | 2      | 2    | 2    | 2    | 2      | 2    | 2                     | 2                      | 2     | 2                      |
| 2<br>5<br>mg/kg/dose   | Mean  | 10.94                  | 5.62                   | 12.9   | 42.2 | 75.0 | 22.9 | 30.5   | 13.8 | 84.4                  | 2.60                   | 23.9  | 7.72                   |
|                        | SD    | 0.74                   | 0.07                   | 0.4    | 0.8  | 2.4  | 1.0  | 0.3    | 0.5  | 13.5                  | 0.42                   | 5.5   | 1.32                   |
|                        | N     | 2                      | 2                      | 2      | 2    | 2    | 2    | 2      | 2    | 2                     | 2                      | 2     | 2                      |
|                        | %Diff | -2.02                  | -4.34                  | -5.2   | -8.0 | -3.8 | -0.7 | 3.0    | -4.5 | 13.7                  | -34.14                 | -31.6 | 24.14                  |
| 3<br>25<br>mg/kg/dose  | Mean  | 7.96                   | 5.60                   | 14.0   | 45.2 | 80.7 | 25.0 | 30.9   | 14.3 | 61.5                  | 2.37                   | 30.3  | 5.26                   |
|                        | SD    | 0.46                   | 0.01                   | 0.3    | 1.1  | 1.8  | 0.5  | 0.1    | 0.4  | 7.9                   | 1.26                   | 17.5  | 1.55                   |
|                        | N     | 2                      | 2                      | 2      | 2    | 2    | 2    | 2      | 2    | 2                     | 2                      | 2     | 2                      |
|                        | %Diff | -28.72                 | -4.68                  | 3.3    | -1.4 | 3.5  | 8.2  | 4.4    | -0.7 | -17.1                 | -39.85                 | -13.3 | -15.45                 |
| 4<br>100<br>mg/kg/dose | Mean  | 9.45                   | 5.90                   | 14.0   | 45.2 | 76.9 | 23.7 | 30.9   | 13.9 | 51.6                  | 3.68                   | 39.1  | 5.44                   |
|                        | SD    | 0.09                   | 0.98                   | 1.6    | 5.6  | 3.5  | 1.3  | 0.3    | 0.3  | 5.1                   | 2.36                   | 25.5  | 2.46                   |
|                        | N     | 2                      | 2                      | 2      | 2    | 2    | 2    | 2      | 2    | 2                     | 2                      | 2     | 2                      |
|                        | %Diff | -15.37                 | 0.34                   | 3.0    | -1.4 | -1.4 | 2.8  | 4.4    | -3.5 | -30.5                 | -6.60                  | 11.9  | -12.47                 |

Table 5 Summary of Hematology-Recovery Phase (Cont'd)

Day: 210 Relative to Start Date

| Sex: Male  |       | %LYMP | #MONO                  | %MONO | #EOS                   | %EOS  | #BASO                  | %BASO | PLT                    | MPV  |
|------------|-------|-------|------------------------|-------|------------------------|-------|------------------------|-------|------------------------|------|
|            |       | (%)   | (x10 <sup>3</sup> /μL) | (%)   | (x10 <sup>3</sup> /μL) | (%)   | (x10 <sup>3</sup> /μL) | (%)   | (x10 <sup>3</sup> /μL) | (fL) |
| 1          | Mean  | 55.8  | 0.37                   | 3.3   | 0.55                   | 5.2   | 0.03                   | 0.3   | 356                    | 8.4  |
| 0          | SD    | 1.1   | 0.08                   | 0.4   | 0.61                   | 5.9   | 0.00                   | 0.0   | 35                     | 0.4  |
| mg/kg/dose | N     | 2     | 2                      | 2     | 2                      | 2     | 2                      | 2     | 2                      | 2    |
| 2          | Mean  | 70.4  | 0.41                   | 3.8   | 0.14                   | 1.3   | 0.04                   | 0.3   | 338                    | 8.8  |
| 5          | SD    | 7.3   | 0.11                   | 1.2   | 0.08                   | 0.8   | 0.01                   | 0.0   | 78                     | 2.8  |
| mg/kg/dose | N     | 2     | 2                      | 2     | 2                      | 2     | 2                      | 2     | 2                      | 2    |
|            | %Diff | 26.2  | 9.46                   | 13.6  | -75.45                 | -75.7 | 16.67                  | 0.0   | -5                     | 4.8  |
| 3          | Mean  | 65.6  | 0.27                   | 3.3   | 0.04                   | 0.4   | 0.02                   | 0.2   | 273                    | 12.1 |
| 25         | SD    | 15.7  | 0.15                   | 1.7   | 0.01                   | 0.1   | 0.01                   | 0.0   | 78                     | 3.7  |
| mg/kg/dose | N     | 2     | 2                      | 2     | 2                      | 2     | 2                      | 2     | 2                      | 2    |
|            | %Diff | 17.7  | -28.38                 | 0.0   | -93.64                 | -93.2 | -50.00                 | -33.3 | -23                    | 44.0 |
| 4          | Mean  | 57.5  | 0.18                   | 1.9   | 0.08                   | 0.8   | 0.03                   | 0.3   | 305                    | 8.6  |
| 100        | SD    | 25.5  | 0.01                   | 0.1   | 0.03                   | 0.3   | 0.00                   | 0.0   | 40                     | 1.5  |
| mg/kg/dose | N     | 2     | 2                      | 2     | 2                      | 2     | 2                      | 2     | 2                      | 2    |
|            | %Diff | 3.1   | -51.35                 | -42.4 | -85.45                 | -84.5 | 0.00                   | 0.0   | -14                    | 1.8  |

**Table 6      Summary of Coagulation**

Table 6 Summary of Coagulation

Key Page

**Measurement Descriptions**

Headings Used

PT  
APTT  
FIB

Description

Prothrombin Time  
Activated Partial Thromboplastin Time  
Fibrinogen

Table 6 Summary of Coagulation-Pretest and Dosing Phase

Day(s) Relative to Start Date

| Sex: Male  |       | PT    | PT    | PT    | PT    | PT    | PT    | APTT  | APTT  | APTT  | APTT  | APTT  | APTT  |
|------------|-------|-------|-------|-------|-------|-------|-------|-------|-------|-------|-------|-------|-------|
|            |       | (Sec) | (Sec) | (Sec) | (Sec) | (Sec) | (Sec) | (Sec) | (Sec) | (Sec) | (Sec) | (Sec) | (Sec) |
|            |       | [a]   | [a]   | [a]   | [a]   | [a]   | [a]   | [a]   | [a1]  | [a]   | [a]   | [a]   | [a]   |
|            |       | -11   | -6    | 53    | 87    | 123   | 179   | -11   | -6    | 53    | 87    | 123   | 179   |
| 1          | Mean  | 11.2  | 10.0  | 12.7  | 11.9  | 13.9  | 14.1  | 17.5  | 17.7  | 17.5  | 17.6  | 17.8  | 18.0  |
| 0          | SD    | 0.4   | 0.8   | 2.9   | 1.2   | 2.0   | 1.9   | 0.6   | 1.0   | 0.9   | 1.3   | 1.4   | 1.4   |
| mg/kg/dose | N     | 6     | 6     | 6     | 6     | 6     | 6     | 6     | 6     | 6     | 6     | 6     | 6     |
| 2          | Mean  | 11.0  | 10.4  | 11.1  | 11.1  | 13.0  | 11.7* | 17.9  | 18.0  | 18.3  | 18.3  | 18.9  | 18.7  |
| 5          | SD    | 1.0   | 0.9   | 0.9   | 0.6   | 1.3   | 1.1   | 1.0   | 0.9   | 0.6   | 0.9   | 1.0   | 1.2   |
| mg/kg/dose | N     | 6     | 6     | 6     | 6     | 6     | 6     | 6     | 6     | 6     | 6     | 6     | 6     |
|            | %Diff | -2.2  | 4.2   | -12.0 | -6.9  | -6.8  | -16.8 | 1.8   | 2.1   | 4.5   | 3.9   | 6.1   | 3.7   |
| 3          | Mean  | 11.6  | 10.3  | 12.0  | 13.5  | 14.0  | 12.7  | 18.2  | 18.4  | 18.0  | 18.3  | 19.6  | 18.2  |
| 25         | SD    | 1.3   | 0.6   | 1.7   | 3.5   | 1.7   | 1.1   | 1.3   | 1.4   | 1.1   | 1.3   | 2.3   | 1.6   |
| mg/kg/dose | N     | 6     | 6     | 6     | 6     | 6     | 6     | 6     | 6     | 6     | 6     | 6     | 6     |
|            | %Diff | 3.0   | 2.7   | -5.1  | 13.7  | 0.5   | -9.6  | 3.9   | 4.2   | 3.0   | 4.0   | 10.3  | 1.1   |
| 4          | Mean  | 11.2  | 10.3  | 11.7  | 11.7  | 15.1  | 12.2  | 17.4  | 17.4  | 17.2  | 17.5  | 18.0  | 17.4  |
| 100        | SD    | 0.4   | 0.5   | 1.6   | 1.2   | 3.0   | 1.3   | 1.6   | 2.2   | 1.7   | 1.6   | 1.6   | 1.7   |
| mg/kg/dose | N     | 6     | 6     | 6     | 6     | 6     | 6     | 6     | 6     | 6     | 6     | 6     | 6     |
|            | %Diff | 0.1   | 3.3   | -7.9  | -1.3  | 8.5   | -13.6 | -1.0  | -1.2  | -1.6  | -0.3  | 1.4   | -3.2  |

[a] - Anova & Dunnett: \* =  $p \leq 0.05$ 

[a1] - Kruskal-Wallis &amp; Dunnett on Ranks

Table 6 Summary of Coagulation-Pretest and Dosing Phase (Cont'd)

Day(s) Relative to Start Date

| Sex: Male  |       | FIB   | FIB   | FIB   | FIB   | FIB   | FIB    |
|------------|-------|-------|-------|-------|-------|-------|--------|
|            |       | (g/L) | (g/L) | (g/L) | (g/L) | (g/L) | (g/L)  |
|            |       | [a]   | [a]   | [a]   | [a1]  | [a1]  | [a2]   |
|            |       | -11   | -6    | 53    | 87    | 123   | 179    |
| 1          | Mean  | 2.20  | 2.64  | 2.35  | 2.30  | 1.97  | 2.64   |
| 0          | SD    | 0.45  | 0.49  | 0.59  | 0.52  | 0.45  | 0.64   |
| mg/kg/dose | N     | 6     | 6     | 6     | 6     | 6     | 6      |
| 2          | Mean  | 2.32  | 2.53  | 2.24  | 2.35  | 1.94  | 2.30   |
| 5          | SD    | 0.55  | 0.50  | 0.30  | 0.60  | 0.39  | 0.38   |
| mg/kg/dose | N     | 6     | 6     | 6     | 6     | 6     | 6      |
|            | %Diff | 5.47  | -4.05 | -4.47 | 2.03  | -1.78 | -12.82 |
| 3          | Mean  | 2.53  | 3.08  | 2.51  | 2.47  | 3.18  | 2.66   |
| 25         | SD    | 0.18  | 0.62  | 0.35  | 0.31  | 2.47  | 0.15   |
| mg/kg/dose | N     | 6     | 6     | 6     | 6     | 6     | 6      |
|            | %Diff | 15.34 | 16.95 | 6.82  | 7.02  | 61.25 | 0.88   |
| 4          | Mean  | 2.61  | 2.63  | 2.45  | 2.40  | 1.90  | 2.24   |
| 100        | SD    | 0.62  | 0.30  | 0.51  | 0.92  | 0.53  | 0.34   |
| mg/kg/dose | N     | 6     | 6     | 6     | 6     | 6     | 6      |
|            | %Diff | 18.68 | -0.32 | 4.40  | 4.20  | -3.72 | -15.28 |

[a] - Anova &amp; Dunnett

[a1] - Anova &amp; Dunnett(Log)

[a2] - Kruskal-Wallis &amp; Dunnett on Ranks



Table 6 Summary of Coagulation-Pretest and Dosing Phase (Cont'd)

Day(s) Relative to Start Date

| Sex: Female |       | PT    | PT    | PT    | PT    | PT    | PT    | APTT  | APTT  | APTT  | APTT  | APTT  | APTT  |
|-------------|-------|-------|-------|-------|-------|-------|-------|-------|-------|-------|-------|-------|-------|
|             |       | (Sec) | (Sec) | (Sec) | (Sec) | (Sec) | (Sec) | (Sec) | (Sec) | (Sec) | (Sec) | (Sec) | (Sec) |
|             |       | [a]   | [a1]  | [a]   | [a1]  | [a1]  | [a1]  | [a1]  | [a1]  | [a1]  | [a1]  | [a1]  | [a1]  |
|             |       | -12   | -7    | 52    | 86    | 122   | 178   | -12   | -7    | 52    | 86    | 122   | 178   |
| 1           | Mean  | 11.0  | 10.0  | 10.3  | 11.9  | 13.2  | 12.5  | 18.2  | 17.9  | 17.8  | 18.2  | 18.3  | 17.9  |
| 0           | SD    | 0.8   | 0.3   | 0.6   | 1.5   | 1.0   | 1.6   | 1.3   | 1.3   | 1.0   | 1.5   | 1.1   | 0.9   |
| mg/kg/dose  | N     | 6     | 6     | 6     | 6     | 6     | 6     | 6     | 6     | 6     | 6     | 6     | 6     |
| 2           | Mean  | 11.2  | 10.1  | 10.3  | 11.7  | 12.5  | 11.0  | 18.9  | 18.5  | 18.0  | 18.7  | 19.0  | 18.7  |
| 5           | SD    | 1.4   | 0.9   | 1.5   | 1.1   | 2.2   | 1.1   | 2.0   | 2.1   | 2.1   | 1.8   | 1.9   | 2.2   |
| mg/kg/dose  | N     | 6     | 6     | 6     | 6     | 6     | 6     | 6     | 6     | 6     | 6     | 6     | 6     |
|             | %Diff | 2.1   | 0.8   | 0.3   | -2.4  | -4.8  | -12.2 | 4.2   | 3.4   | 1.1   | 2.7   | 3.5   | 4.4   |
| 3           | Mean  | 11.2  | 10.0  | 10.7  | 12.2  | 14.0  | 12.7  | 17.7  | 16.8  | 16.7  | 17.3  | 17.7  | 17.1  |
| 25          | SD    | 1.2   | 0.7   | 0.4   | 1.3   | 1.4   | 2.5   | 1.1   | 1.3   | 1.2   | 1.5   | 1.2   | 1.3   |
| mg/kg/dose  | N     | 6     | 6     | 6     | 6     | 6     | 6     | 6     | 6     | 6     | 6     | 6     | 6     |
|             | %Diff | 2.3   | 0.2   | 3.6   | 1.8   | 6.1   | 2.1   | -2.8  | -6.4  | -6.2  | -5.2  | -3.5  | -4.4  |
| 4           | Mean  | 12.6  | 10.4  | 10.9  | 12.3  | 16.2  | 14.4  | 18.0  | 17.7  | 17.4  | 18.1  | 18.7  | 17.5  |
| 100         | SD    | 2.3   | 1.0   | 0.6   | 0.8   | 5.7   | 3.1   | 1.7   | 1.9   | 1.8   | 2.0   | 1.9   | 2.0   |
| mg/kg/dose  | N     | 6     | 6     | 6     | 6     | 6     | 6     | 6     | 6     | 6     | 6     | 6     | 6     |
|             | %Diff | 14.4  | 4.0   | 5.5   | 2.9   | 22.7  | 15.2  | -1.1  | -1.4  | -2.4  | -0.5  | 1.9   | -2.4  |

[a] - Kruskal-Wallis & Dunnett on Ranks

[a1] - Anova & Dunnett

Table 6 Summary of Coagulation-Pretest and Dosing Phase (Cont'd)

Day(s) Relative to Start Date

| Sex: Female |       | FIB    | FIB    | FIB    | FIB    | FIB   | FIB   |
|-------------|-------|--------|--------|--------|--------|-------|-------|
|             |       | (g/L)  | (g/L)  | (g/L)  | (g/L)  | (g/L) | (g/L) |
|             |       | [a]    | [a]    | [a]    | [a]    | [a]   | [a]   |
|             |       | -12    | -7     | 52     | 86     | 122   | 178   |
| 1           | Mean  | 2.35   | 2.38   | 2.59   | 2.28   | 2.03  | 2.28  |
| 0           | SD    | 0.31   | 0.46   | 0.56   | 0.48   | 0.43  | 0.50  |
| mg/kg/dose  | N     | 6      | 6      | 6      | 6      | 6     | 6     |
| 2           | Mean  | 2.41   | 2.35   | 2.46   | 2.31   | 2.10  | 2.25  |
| 5           | SD    | 0.58   | 0.46   | 0.30   | 0.60   | 0.57  | 0.46  |
| mg/kg/dose  | N     | 6      | 6      | 6      | 6      | 6     | 6     |
|             | %Diff | 2.63   | -1.26  | -4.96  | 1.39   | 3.70  | -1.39 |
| 3           | Mean  | 2.39   | 2.12   | 2.25   | 1.93   | 1.87  | 2.14  |
| 25          | SD    | 0.97   | 0.34   | 0.55   | 0.59   | 0.49  | 0.43  |
| mg/kg/dose  | N     | 6      | 6      | 6      | 6      | 6     | 6     |
|             | %Diff | 1.85   | -10.93 | -13.07 | -15.37 | -7.90 | -6.22 |
| 4           | Mean  | 2.10   | 2.33   | 2.18   | 1.97   | 1.90  | 2.14  |
| 100         | SD    | 0.54   | 0.55   | 0.31   | 0.24   | 0.26  | 0.42  |
| mg/kg/dose  | N     | 6      | 6      | 6      | 6      | 6     | 6     |
|             | %Diff | -10.37 | -2.24  | -15.65 | -13.40 | -6.01 | -5.93 |

[a] - Anova &amp; Dunnett

Table 6 Summary of Coagulation-Recovery Phase

Day: 209 Relative to Start Date

| Sex: Female |       | PT    | APTT  | FIB    |
|-------------|-------|-------|-------|--------|
|             |       | (Sec) | (Sec) | (g/L)  |
| 1           | Mean  | 16.9  | 17.0  | 2.21   |
| 0           | SD    | 0.6   | 0.1   | 0.21   |
| mg/kg/dose  | N     | 2     | 2     | 2      |
| 2           | Mean  | 13.9  | 19.0  | 1.84   |
| 5           | SD    | 0.8   | 0.9   | 0.32   |
| mg/kg/dose  | N     | 2     | 2     | 2      |
|             | %Diff | -17.8 | 11.5  | -16.78 |
| 3           | Mean  | 18.0  | 18.2  | 2.10   |
| 25          | SD    | 1.0   | 1.3   | 0.91   |
| mg/kg/dose  | N     | 2     | 2     | 2      |
|             | %Diff | 6.5   | 6.8   | -4.99  |
| 4           | Mean  | 14.0  | 20.1  | 2.39   |
| 100         | SD    | 0.6   | 1.3   | 0.24   |
| mg/kg/dose  | N     | 2     | 2     | 2      |
|             | %Diff | -17.5 | 17.9  | 8.39   |

Table 6 Summary of Coagulation-Recovery Phase (Cont'd)

Day: 210 Relative to Start Date

| Sex: Male  |       | PT    | APTT  | FIB   |
|------------|-------|-------|-------|-------|
|            |       | (Sec) | (Sec) | (g/L) |
| 1          | Mean  | 19.4  | 18.3  | 2.53  |
| 0          | SD    | 1.3   | 0.1   | 0.18  |
| mg/kg/dose | N     | 2     | 2     | 2     |
| 2          | Mean  | 14.3  | 19.6  | 2.84  |
| 5          | SD    | 1.3   | 0.1   | 0.30  |
| mg/kg/dose | N     | 2     | 2     | 2     |
|            | %Diff | -26.4 | 7.1   | 12.28 |
| 3          | Mean  | 18.1  | 18.1  | 2.68  |
| 25         | SD    | 1.6   | 1.0   | 0.32  |
| mg/kg/dose | N     | 2     | 2     | 2     |
|            | %Diff | -6.5  | -0.8  | 5.94  |
| 4          | Mean  | 12.4  | 18.3  | 2.58  |
| 100        | SD    | 0.8   | 3.3   | 0.62  |
| mg/kg/dose | N     | 2     | 2     | 2     |
|            | %Diff | -35.9 | 0.0   | 2.18  |

**Table 7      Summary of Chemistry**

Table 7 Summary of Chemistry

Key Page**Measurement Descriptions**Headings Used

ALT

AST

TP

ALB

TBIL

ALP

GGT

sGLU

UREA

CRE

Ca

P

TCHO

TG

K

Na

Cl

GLB

A/G

CK

Description

Alanine Aminotransferase

Aspartate Aminotransferase

Total Protein

Albumin

Total Bilirubin

Alkaline Phosphatase

Gamma-Glutamytransferase

Glucose

Urea

Creatinine

Calcium

Inorganic Phosphorus

Total Cholesterol

Triglyceride

Potassium

Sodium

Chloride

Globulin

A/G Ratio

Creatine Kinase

Table 7 Summary of Chemistry-Pretest and Dosing Phase

Day(s) Relative to Start Date

| Sex: Male  |       | ALT   | ALT   | ALT   | ALT   | ALT   | ALT   | AST   | AST   | AST   | AST   | AST   | AST   |
|------------|-------|-------|-------|-------|-------|-------|-------|-------|-------|-------|-------|-------|-------|
|            |       | (U/L) | (U/L) | (U/L) | (U/L) | (U/L) | (U/L) | (U/L) | (U/L) | (U/L) | (U/L) | (U/L) | (U/L) |
|            |       | [a]   | [a]   | [a1]  | [a]   | [a]   | [a]   | [a]   | [a1]  | [a]   | [a]   | [a]   | [a]   |
|            |       | -11   | -6    | 53    | 87    | 123   | 179   | -11   | -6    | 53    | 87    | 123   | 179   |
| 1          | Mean  | 50    | 58    | 44    | 57    | 39    | 43    | 60    | 70    | 51    | 70    | 45    | 56    |
| 0          | SD    | 9     | 13    | 7     | 16    | 6     | 9     | 14    | 24    | 10    | 33    | 6     | 11    |
| mg/kg/dose | N     | 6     | 6     | 6     | 6     | 6     | 6     | 6     | 6     | 6     | 6     | 6     | 6     |
| 2          | Mean  | 53    | 56    | 53    | 70    | 47    | 53    | 62    | 70    | 55    | 74    | 51    | 58    |
| 5          | SD    | 19    | 17    | 21    | 26    | 12    | 13    | 15    | 15    | 15    | 30    | 18    | 21    |
| mg/kg/dose | N     | 6     | 6     | 6     | 6     | 6     | 6     | 6     | 6     | 6     | 6     | 6     | 6     |
|            | %Diff | 5     | -4    | 21    | 24    | 21    | 22    | 3     | 1     | 7     | 6     | 12    | 3     |
| 3          | Mean  | 51    | 48    | 47    | 58    | 42    | 46    | 49    | 50    | 42    | 62    | 44    | 46    |
| 25         | SD    | 7     | 6     | 10    | 13    | 6     | 11    | 12    | 11    | 8     | 26    | 6     | 12    |
| mg/kg/dose | N     | 6     | 6     | 6     | 6     | 6     | 6     | 6     | 6     | 6     | 6     | 6     | 6     |
|            | %Diff | 2     | -17   | 6     | 2     | 7     | 6     | -18   | -29   | -18   | -11   | -4    | -18   |
| 4          | Mean  | 56    | 52    | 51    | 70    | 47    | 61    | 55    | 53    | 42    | 74    | 46    | 72    |
| 100        | SD    | 18    | 11    | 11    | 25    | 9     | 20    | 8     | 10    | 9     | 40    | 13    | 54    |
| mg/kg/dose | N     | 6     | 6     | 6     | 6     | 6     | 6     | 6     | 6     | 6     | 6     | 6     | 6     |
|            | %Diff | 12    | -10   | 17    | 23    | 21    | 41    | -9    | -24   | -19   | 5     | 1     | 28    |

[a] - Anova &amp; Dunnett

[a1] - Anova &amp; Dunnett(Log)

Table 7 Summary of Chemistry-Pretest and Dosing Phase (Cont'd)

Day(s) Relative to Start Date

| Sex: Male |       | TP    | TP    | TP    | TP    | TP    | TP    | ALB   | ALB   | ALB   | ALB   | ALB   | ALB   |
|-----------|-------|-------|-------|-------|-------|-------|-------|-------|-------|-------|-------|-------|-------|
|           |       | (g/L) | (g/L) | (g/L) | (g/L) | (g/L) | (g/L) | (g/L) | (g/L) | (g/L) | (g/L) | (g/L) | (g/L) |
|           |       | [a]   | [a]   | [a]   | [a]   | [a]   | [a]   | [a]   | [a]   | [a]   | [a]   | [a]   | [a]   |
|           |       | -11   | -6    | 53    | 87    | 123   | 179   | -11   | -6    | 53    | 87    | 123   | 179   |
| 1         | Mean  | 80.4  | 79.5  | 76.5  | 74.0  | 72.7  | 73.3  | 44.9  | 44.5  | 44.1  | 42.9  | 42.7  | 42.9  |
| 0         | SD    | 5.6   | 2.3   | 6.2   | 2.8   | 1.8   | 2.8   | 3.0   | 2.2   | 2.9   | 2.1   | 2.1   | 1.8   |
|           | N     | 6     | 6     | 6     | 6     | 6     | 6     | 6     | 6     | 6     | 6     | 6     | 6     |
| 2         | Mean  | 76.3  | 76.1  | 73.7  | 74.7  | 72.6  | 71.1  | 43.7  | 44.0  | 43.3  | 43.3  | 43.0  | 42.7  |
| 5         | SD    | 3.4   | 2.5   | 4.9   | 3.9   | 3.9   | 2.8   | 4.4   | 3.4   | 1.7   | 1.8   | 1.8   | 1.3   |
|           | N     | 6     | 6     | 6     | 6     | 6     | 6     | 6     | 6     | 6     | 6     | 6     | 6     |
|           | %Diff | -5.1  | -4.3  | -3.7  | 0.9   | -0.1  | -3.1  | -2.7  | -1.1  | -1.9  | 0.8   | 0.8   | -0.4  |
| 3         | Mean  | 77.7  | 77.1  | 74.4  | 72.6  | 71.5  | 72.2  | 45.1  | 44.6  | 44.5  | 43.0  | 41.4  | 43.1  |
| 25        | SD    | 2.9   | 3.0   | 3.0   | 4.5   | 4.4   | 2.9   | 1.5   | 1.8   | 1.8   | 2.8   | 3.1   | 1.4   |
|           | N     | 6     | 6     | 6     | 6     | 6     | 6     | 6     | 6     | 6     | 6     | 6     | 6     |
|           | %Diff | -3.3  | -3.1  | -2.8  | -1.9  | -1.7  | -1.5  | 0.4   | 0.4   | 0.9   | 0.1   | -3.2  | 0.6   |
| 4         | Mean  | 77.4  | 79.8  | 78.6  | 77.0  | 76.7  | 75.7  | 42.6  | 44.4  | 43.7  | 41.2  | 42.6  | 43.2  |
| 100       | SD    | 3.4   | 5.3   | 2.7   | 3.6   | 3.7   | 3.1   | 3.3   | 3.6   | 2.4   | 2.2   | 3.2   | 1.8   |
|           | N     | 6     | 6     | 6     | 6     | 6     | 6     | 6     | 6     | 6     | 6     | 6     | 6     |
|           | %Diff | -3.7  | 0.3   | 2.7   | 4.1   | 5.5   | 3.3   | -5.2  | -0.1  | -0.9  | -4.0  | -0.2  | 0.7   |

[a] - Anova &amp; Dunnett



Table 7 Summary of Chemistry-Pretest and Dosing Phase (Cont'd)

Day(s) Relative to Start Date

| Sex: Male  |       | TBIL                  | TBIL                  | TBIL                  | TBIL                  | TBIL                  | TBIL                  | ALP   | ALP   | ALP   | ALP   | ALP   | ALP   |
|------------|-------|-----------------------|-----------------------|-----------------------|-----------------------|-----------------------|-----------------------|-------|-------|-------|-------|-------|-------|
|            |       | ( $\mu\text{mol/L}$ ) | ( $\mu\text{mol/L}$ ) | ( $\mu\text{mol/L}$ ) | ( $\mu\text{mol/L}$ ) | ( $\mu\text{mol/L}$ ) | ( $\mu\text{mol/L}$ ) | (U/L) | (U/L) | (U/L) | (U/L) | (U/L) | (U/L) |
|            |       | [a]                   | [a]                   | [a]                   | [a]                   | [a]                   | [a]                   | [a]   | [a]   | [a]   | [a]   | [a]   | [a]   |
|            |       | -11                   | -6                    | 53                    | 87                    | 123                   | 179                   | -11   | -6    | 53    | 87    | 123   | 179   |
| 1          | Mean  | 7.93                  | 4.35                  | 4.41                  | 5.18                  | 5.27                  | 4.98                  | 627   | 564   | 744   | 869   | 853   | 838   |
| 0          | SD    | 2.02                  | 0.74                  | 1.16                  | 1.61                  | 2.41                  | 1.17                  | 217   | 153   | 183   | 216   | 138   | 148   |
| mg/kg/dose | N     | 6                     | 6                     | 6                     | 6                     | 6                     | 6                     | 6     | 6     | 6     | 6     | 6     | 6     |
| 2          | Mean  | 10.67                 | 6.99**                | 5.86                  | 6.08                  | 7.48                  | 7.01                  | 588   | 532   | 640   | 729   | 703   | 686   |
| 5          | SD    | 2.69                  | 1.99                  | 0.72                  | 0.74                  | 1.78                  | 1.47                  | 206   | 185   | 204   | 208   | 144   | 165   |
| mg/kg/dose | N     | 6                     | 6                     | 6                     | 6                     | 6                     | 6                     | 6     | 6     | 6     | 6     | 6     | 6     |
|            | %Diff | 34.52                 | 60.70                 | 32.84                 | 17.35                 | 41.86                 | 40.65                 | -6    | -6    | -14   | -16   | -18   | -18   |
| 3          | Mean  | 7.51                  | 4.99                  | 4.51                  | 6.42                  | 4.91                  | 4.64                  | 562   | 518   | 663   | 723   | 646   | 607   |
| 25         | SD    | 2.11                  | 1.09                  | 0.57                  | 2.66                  | 0.58                  | 1.59                  | 128   | 120   | 140   | 170   | 127   | 70    |
| mg/kg/dose | N     | 6                     | 6                     | 6                     | 6                     | 6                     | 6                     | 6     | 6     | 6     | 6     | 6     | 6     |
|            | %Diff | -5.32                 | 14.59                 | 2.23                  | 23.88                 | -6.80                 | -6.79                 | -10   | -8    | -11   | -17   | -24   | -28   |
| 4          | Mean  | 7.70                  | 4.77                  | 5.51                  | 6.46                  | 6.87                  | 7.32                  | 481   | 456   | 540   | 667   | 677   | 649   |
| 100        | SD    | 1.15                  | 0.66                  | 1.60                  | 1.93                  | 2.03                  | 2.54                  | 126   | 95    | 151   | 198   | 214   | 172   |
| mg/kg/dose | N     | 6                     | 6                     | 6                     | 6                     | 6                     | 6                     | 6     | 6     | 6     | 6     | 6     | 6     |
|            | %Diff | -2.94                 | 9.61                  | 24.94                 | 24.75                 | 26.46                 | 46.87                 | -23   | -19   | -27   | -23   | -21   | -23   |

[a] - Anova & Dunnett: \*\* =  $p \leq 0.01$

Table 7 Summary of Chemistry-Pretest and Dosing Phase (Cont'd)

Day(s) Relative to Start Date

| Sex: Male  |       | GGT   | GGT   | GGT   | GGT   | GGT   | GGT   | sGLU     | sGLU     | sGLU     | sGLU     | sGLU     | sGLU     |
|------------|-------|-------|-------|-------|-------|-------|-------|----------|----------|----------|----------|----------|----------|
|            |       | (U/L) | (U/L) | (U/L) | (U/L) | (U/L) | (U/L) | (mmol/L) | (mmol/L) | (mmol/L) | (mmol/L) | (mmol/L) | (mmol/L) |
|            |       | [a]   | [a]   | [a]   | [a]   | [a]   | [a]   | [a]      | [a]      | [a]      | [a]      | [a]      | [a]      |
|            |       | -11   | -6    | 53    | 87    | 123   | 179   | -11      | -6       | 53       | 87       | 123      | 179      |
| 1          | Mean  | 75    | 70    | 88    | 94    | 105   | 96    | 3.08     | 4.74     | 3.72     | 3.33     | 3.35     | 3.43     |
| 0          | SD    | 22    | 19    | 30    | 31    | 32    | 35    | 0.48     | 0.81     | 0.39     | 0.66     | 0.45     | 0.62     |
| mg/kg/dose | N     | 6     | 6     | 6     | 6     | 6     | 6     | 6        | 6        | 6        | 6        | 6        | 6        |
| 2          | Mean  | 76    | 70    | 80    | 87    | 96    | 87    | 2.81     | 4.07     | 3.59     | 3.40     | 3.20     | 3.34     |
| 5          | SD    | 26    | 23    | 31    | 35    | 37    | 33    | 0.39     | 0.87     | 0.37     | 0.48     | 0.25     | 0.28     |
| mg/kg/dose | N     | 6     | 6     | 6     | 6     | 6     | 6     | 6        | 6        | 6        | 6        | 6        | 6        |
|            | %Diff | 2     | 0     | -9    | -7    | -9    | -10   | -8.66    | -14.03   | -3.41    | 2.21     | -4.33    | -2.72    |
| 3          | Mean  | 78    | 71    | 83    | 85    | 85    | 77    | 2.88     | 4.09     | 3.64     | 3.10     | 3.21     | 3.38     |
| 25         | SD    | 34    | 30    | 31    | 34    | 28    | 21    | 0.35     | 0.64     | 0.36     | 0.65     | 0.44     | 0.68     |
| mg/kg/dose | N     | 6     | 6     | 6     | 6     | 6     | 6     | 6        | 6        | 6        | 6        | 6        | 6        |
|            | %Diff | 5     | 0     | -5    | -9    | -19   | -20   | -6.44    | -13.72   | -2.11    | -6.67    | -4.03    | -1.56    |
| 4          | Mean  | 55    | 55    | 62    | 61    | 70    | 64    | 2.70     | 4.01     | 3.43     | 2.88     | 3.05     | 3.51     |
| 100        | SD    | 12    | 11    | 18    | 16    | 15    | 14    | 0.32     | 0.61     | 0.35     | 0.18     | 0.20     | 0.32     |
| mg/kg/dose | N     | 6     | 6     | 6     | 6     | 6     | 6     | 6        | 6        | 6        | 6        | 6        | 6        |
|            | %Diff | -26   | -22   | -29   | -35   | -34   | -34   | -12.45   | -15.41   | -7.89    | -13.43   | -8.76    | 2.48     |

[a] - Anova &amp; Dunnett

Table 7 Summary of Chemistry-Pretest and Dosing Phase (Cont'd)

Day(s) Relative to Start Date

| Sex: Male |       | UREA     | UREA     | UREA     | UREA     | UREA     | UREA     | CRE      | CRE      | CRE      | CRE      | CRE      | CRE      |
|-----------|-------|----------|----------|----------|----------|----------|----------|----------|----------|----------|----------|----------|----------|
|           |       | (mmol/L) | (mmol/L) | (mmol/L) | (mmol/L) | (mmol/L) | (mmol/L) | (µmol/L) | (µmol/L) | (µmol/L) | (µmol/L) | (µmol/L) | (µmol/L) |
|           |       | [a]      | [a1]     | [a1]     | [a]      | [a1]     | [a1]     | [a1]     | [a1]     | [a1]     | [a1]     | [a1]     | [a1]     |
|           |       | -11      | -6       | 53       | 87       | 123      | 179      | -11      | -6       | 53       | 87       | 123      | 179      |
| 1         | Mean  | 7.42     | 5.96     | 6.65     | 6.91     | 7.32     | 6.99     | 62       | 57       | 60       | 60       | 61       | 62       |
| 0         | SD    | 0.73     | 0.99     | 0.98     | 0.57     | 1.55     | 0.93     | 6        | 5        | 6        | 7        | 9        | 5        |
|           | N     | 6        | 6        | 6        | 6        | 6        | 6        | 6        | 6        | 6        | 6        | 6        | 6        |
| 2         | Mean  | 8.03     | 6.14     | 7.49     | 7.35     | 8.19     | 8.01     | 66       | 62       | 64       | 64       | 69       | 68       |
| 5         | SD    | 2.09     | 1.19     | 1.48     | 1.13     | 0.96     | 1.40     | 16       | 15       | 16       | 12       | 16       | 15       |
|           | N     | 6        | 6        | 6        | 6        | 6        | 6        | 6        | 6        | 6        | 6        | 6        | 6        |
|           | %Diff | 8.32     | 3.11     | 12.69    | 6.39     | 11.93    | 14.59    | 6        | 8        | 6        | 6        | 13       | 9        |
| 3         | Mean  | 6.96     | 5.45     | 6.19     | 6.22     | 6.75     | 6.06     | 63       | 59       | 61       | 59       | 64       | 64       |
| 25        | SD    | 0.52     | 0.87     | 0.95     | 1.01     | 0.64     | 1.14     | 8        | 7        | 6        | 5        | 6        | 8        |
|           | N     | 6        | 6        | 6        | 6        | 6        | 6        | 6        | 6        | 6        | 6        | 6        | 6        |
|           | %Diff | -6.20    | -8.54    | -6.90    | -9.96    | -7.79    | -13.42   | 1        | 4        | 2        | -2       | 6        | 3        |
| 4         | Mean  | 7.25     | 5.15     | 7.05     | 7.16     | 7.95     | 7.54     | 61       | 59       | 61       | 61       | 61       | 61       |
| 100       | SD    | 0.85     | 0.67     | 0.95     | 0.31     | 1.03     | 1.21     | 9        | 9        | 10       | 12       | 11       | 12       |
|           | N     | 6        | 6        | 6        | 6        | 6        | 6        | 6        | 6        | 6        | 6        | 6        | 6        |
|           | %Diff | -2.25    | -13.49   | 6.07     | 3.62     | 8.56     | 7.77     | -1       | 3        | 2        | 1        | 1        | -2       |

[a] - Kruskal-Wallis & Dunnett on Ranks

[a1] - Anova & Dunnett

Table 7 Summary of Chemistry-Pretest and Dosing Phase (Cont'd)

Day(s) Relative to Start Date

| Sex: Male  |       | Ca       | Ca       | Ca       | Ca       | Ca       | Ca       | P        | P        | P        | P        | P        | P        |
|------------|-------|----------|----------|----------|----------|----------|----------|----------|----------|----------|----------|----------|----------|
|            |       | (mmol/L) | (mmol/L) | (mmol/L) | (mmol/L) | (mmol/L) | (mmol/L) | (mmol/L) | (mmol/L) | (mmol/L) | (mmol/L) | (mmol/L) | (mmol/L) |
|            |       | [a]      | [a1]     | [a]      | [a1]     | [a1]     | [a]      | [a1]     | [a1]     | [a1]     | [a1]     | [a1]     | [a1]     |
|            |       | -11      | -6       | 53       | 87       | 123      | 179      | -11      | -6       | 53       | 87       | 123      | 179      |
| 1          | Mean  | 2.43     | 2.57     | 2.64     | 2.51     | 2.46     | 2.43     | 2.11     | 1.89     | 2.24     | 2.24     | 2.19     | 2.23     |
| 0          | SD    | 0.06     | 0.11     | 0.15     | 0.10     | 0.07     | 0.06     | 0.30     | 0.21     | 0.36     | 0.31     | 0.40     | 0.13     |
| mg/kg/dose | N     | 6        | 6        | 6        | 6        | 6        | 6        | 6        | 6        | 6        | 6        | 6        | 6        |
| 2          | Mean  | 2.41     | 2.64     | 2.60     | 2.55     | 2.43     | 2.40     | 2.15     | 2.15     | 2.23     | 2.31     | 2.23     | 2.26     |
| 5          | SD    | 0.10     | 0.13     | 0.09     | 0.10     | 0.10     | 0.11     | 0.19     | 0.24     | 0.18     | 0.35     | 0.20     | 0.21     |
| mg/kg/dose | N     | 6        | 6        | 6        | 6        | 6        | 6        | 6        | 6        | 6        | 6        | 6        | 6        |
|            | %Diff | -0.69    | 2.66     | -1.64    | 1.80     | -1.42    | -1.58    | 2.22     | 13.73    | -0.37    | 3.20     | 1.98     | 1.57     |
| 3          | Mean  | 2.41     | 2.58     | 2.62     | 2.49     | 2.46     | 2.45     | 2.23     | 2.00     | 2.12     | 2.25     | 2.13     | 2.25     |
| 25         | SD    | 0.06     | 0.05     | 0.05     | 0.07     | 0.08     | 0.05     | 0.49     | 0.37     | 0.44     | 0.34     | 0.35     | 0.34     |
| mg/kg/dose | N     | 6        | 6        | 6        | 6        | 6        | 6        | 6        | 6        | 6        | 6        | 6        | 6        |
|            | %Diff | -0.48    | 0.13     | -0.63    | -0.60    | -0.07    | 0.48     | 6.01     | 5.37     | -5.36    | 0.30     | -2.52    | 0.97     |
| 4          | Mean  | 2.35     | 2.60     | 2.53     | 2.42     | 2.37     | 2.36     | 2.10     | 1.99     | 2.17     | 2.29     | 2.25     | 2.34     |
| 100        | SD    | 0.13     | 0.13     | 0.10     | 0.06     | 0.13     | 0.03     | 0.32     | 0.31     | 0.45     | 0.43     | 0.30     | 0.29     |
| mg/kg/dose | N     | 6        | 6        | 6        | 6        | 6        | 6        | 6        | 6        | 6        | 6        | 6        | 6        |
|            | %Diff | -3.23    | 1.23     | -4.17    | -3.39    | -3.65    | -3.22    | -0.24    | 5.02     | -3.05    | 2.16     | 3.05     | 5.32     |

[a] - Kruskal-Wallis &amp; Dunnett on Ranks

[a1] - Anova &amp; Dunnett

Table 7 Summary of Chemistry-Pretest and Dosing Phase (Cont'd)

Day(s) Relative to Start Date

| Sex: Male  |       | TCHO     | TCHO     | TCHO     | TCHO     | TCHO     | TCHO     | TG       | TG       | TG       | TG       | TG       | TG       |
|------------|-------|----------|----------|----------|----------|----------|----------|----------|----------|----------|----------|----------|----------|
|            |       | (mmol/L) | (mmol/L) | (mmol/L) | (mmol/L) | (mmol/L) | (mmol/L) | (mmol/L) | (mmol/L) | (mmol/L) | (mmol/L) | (mmol/L) | (mmol/L) |
|            |       | [a]      | [a]      | [a]      | [a]      | [a]      | [a]      | [a]      | [a]      | [a1]     | [a]      | [a]      | [a]      |
|            |       | -11      | -6       | 53       | 87       | 123      | 179      | -11      | -6       | 53       | 87       | 123      | 179      |
| 1          | Mean  | 3.41     | 2.98     | 3.60     | 3.41     | 3.55     | 3.41     | 0.45     | 0.30     | 0.46     | 0.48     | 0.46     | 0.41     |
| 0          | SD    | 0.68     | 0.39     | 0.87     | 0.77     | 0.66     | 0.63     | 0.09     | 0.05     | 0.13     | 0.08     | 0.15     | 0.10     |
| mg/kg/dose | N     | 6        | 6        | 6        | 6        | 6        | 6        | 6        | 6        | 6        | 6        | 6        | 6        |
| 2          | Mean  | 3.87     | 3.84     | 3.97     | 3.98     | 4.07     | 3.76     | 0.61     | 0.36     | 0.54     | 0.47     | 0.62*    | 0.47     |
| 5          | SD    | 0.88     | 0.70     | 0.62     | 0.50     | 0.78     | 0.90     | 0.21     | 0.08     | 0.12     | 0.12     | 0.09     | 0.08     |
| mg/kg/dose | N     | 6        | 6        | 6        | 6        | 6        | 6        | 6        | 6        | 6        | 6        | 6        | 6        |
|            | %Diff | 13.38    | 28.66    | 10.43    | 16.66    | 14.50    | 10.31    | 37.31    | 17.58    | 18.98    | -1.39    | 34.55    | 14.98    |
| 3          | Mean  | 3.77     | 3.66     | 3.79     | 3.49     | 3.36     | 3.39     | 0.52     | 0.31     | 0.45     | 0.46     | 0.56     | 0.45     |
| 25         | SD    | 0.71     | 0.79     | 0.47     | 0.57     | 0.51     | 0.35     | 0.13     | 0.06     | 0.05     | 0.07     | 0.08     | 0.12     |
| mg/kg/dose | N     | 6        | 6        | 6        | 6        | 6        | 6        | 6        | 6        | 6        | 6        | 6        | 6        |
|            | %Diff | 10.45    | 22.63    | 5.38     | 2.39     | -5.54    | -0.68    | 16.42    | 1.10     | -0.73    | -4.86    | 22.55    | 8.50     |
| 4          | Mean  | 3.45     | 3.26     | 3.60     | 3.38     | 3.34     | 3.13     | 0.54     | 0.28     | 0.49     | 0.42     | 0.46     | 0.42     |
| 100        | SD    | 0.90     | 0.74     | 0.49     | 0.55     | 0.40     | 0.34     | 0.09     | 0.03     | 0.03     | 0.08     | 0.06     | 0.06     |
| mg/kg/dose | N     | 6        | 6        | 6        | 6        | 6        | 6        | 6        | 6        | 6        | 6        | 6        | 6        |
|            | %Diff | 1.07     | 9.22     | 0.14     | -0.83    | -5.96    | -8.11    | 20.90    | -8.79    | 7.30     | -12.85   | -0.73    | 2.02     |

[a] - Anova & Dunnett: \* =  $p \leq 0.05$ 

[a1] - Kruskal-Wallis &amp; Dunnett on Ranks

Table 7 Summary of Chemistry-Pretest and Dosing Phase (Cont'd)

Day(s) Relative to Start Date

| Sex: Male  |       | K        | K        | K        | K        | K        | K        | Na       | Na       | Na       | Na       | Na       | Na       |
|------------|-------|----------|----------|----------|----------|----------|----------|----------|----------|----------|----------|----------|----------|
|            |       | (mmol/L) | (mmol/L) | (mmol/L) | (mmol/L) | (mmol/L) | (mmol/L) | (mmol/L) | (mmol/L) | (mmol/L) | (mmol/L) | (mmol/L) | (mmol/L) |
|            |       | [a]      | [a]      | [a]      | [a]      | [a]      | [a]      | [a1]     | [a]      | [a]      | [a1]     | [a]      | [a]      |
|            |       | -11      | -6       | 53       | 87       | 123      | 179      | -11      | -6       | 53       | 87       | 123      | 179      |
| 1          | Mean  | 4.3      | 4.7      | 4.9      | 4.6      | 4.9      | 4.6      | 149      | 151      | 146      | 147      | 145      | 145      |
| 0          | SD    | 0.4      | 0.7      | 0.8      | 0.6      | 0.7      | 0.8      | 3        | 5        | 4        | 3        | 3        | 2        |
| mg/kg/dose | N     | 6        | 6        | 6        | 6        | 6        | 6        | 6        | 6        | 6        | 6        | 6        | 6        |
| 2          | Mean  | 4.4      | 5.0      | 4.8      | 5.2      | 4.4      | 4.4      | 148      | 150      | 145      | 148      | 145      | 144      |
| 5          | SD    | 0.4      | 0.4      | 0.5      | 0.7      | 0.4      | 0.4      | 1        | 2        | 3        | 1        | 2        | 1        |
| mg/kg/dose | N     | 6        | 6        | 6        | 6        | 6        | 6        | 6        | 6        | 6        | 6        | 6        | 6        |
|            | %Diff | 2.3      | 5.3      | -0.3     | 12.8     | -11.2    | -5.1     | -1       | -1       | -1       | 0        | 0        | -1       |
| 3          | Mean  | 4.5      | 4.7      | 4.9      | 4.8      | 4.6      | 4.6      | 148      | 151      | 146      | 147      | 145      | 145      |
| 25         | SD    | 0.5      | 0.5      | 0.5      | 0.8      | 0.5      | 0.7      | 1        | 2        | 3        | 1        | 3        | 1        |
| mg/kg/dose | N     | 6        | 6        | 6        | 6        | 6        | 6        | 6        | 6        | 6        | 6        | 6        | 6        |
|            | %Diff | 4.7      | -0.4     | 0.7      | 4.7      | -5.4     | 0.0      | -1       | 0        | 0        | 0        | 0        | 0        |
| 4          | Mean  | 4.4      | 5.1      | 4.7      | 5.1      | 4.7      | 4.8      | 146 *    | 151      | 146      | 148      | 144      | 144      |
| 100        | SD    | 0.7      | 0.8      | 0.6      | 1.2      | 0.4      | 1.0      | 1        | 4        | 1        | 2        | 1        | 2        |
| mg/kg/dose | N     | 6        | 6        | 6        | 6        | 6        | 6        | 6        | 6        | 6        | 6        | 6        | 6        |
|            | %Diff | 2.7      | 8.1      | -3.4     | 10.9     | -4.8     | 5.5      | -2       | 0        | 0        | 0        | 0        | -1       |

[a] - Anova &amp; Dunnett

[a1] - Kruskal-Wallis & Dunnett on Ranks: \* =  $p \leq 0.05$

Table 7 Summary of Chemistry-Pretest and Dosing Phase (Cont'd)

Day(s) Relative to Start Date

| Sex: Male |       | Cl       | Cl       | Cl       | Cl       | Cl       | Cl       | GLB   | GLB   | GLB   | GLB   | GLB   | GLB   |
|-----------|-------|----------|----------|----------|----------|----------|----------|-------|-------|-------|-------|-------|-------|
|           |       | (mmol/L) | (mmol/L) | (mmol/L) | (mmol/L) | (mmol/L) | (mmol/L) | (g/L) | (g/L) | (g/L) | (g/L) | (g/L) | (g/L) |
|           |       | [a]      | [a]      | [a]      | [a]      | [a]      | [a]      | [a]   | [a]   | [a]   | [a]   | [a]   | [a]   |
|           |       | -11      | -6       | 53       | 87       | 123      | 179      | -11   | -6    | 53    | 87    | 123   | 179   |
| 1         | Mean  | 104      | 106      | 103      | 103      | 104      | 104      | 35.5  | 35.1  | 32.4  | 31.1  | 30.0  | 30.4  |
| 0         | SD    | 1        | 3        | 2        | 1        | 2        | 3        | 3.1   | 2.6   | 3.8   | 1.7   | 1.7   | 1.7   |
|           | N     | 6        | 6        | 6        | 6        | 6        | 6        | 6     | 6     | 6     | 6     | 6     | 6     |
| 2         | Mean  | 104      | 106      | 102      | 103      | 101 *    | 103      | 32.6  | 32.2  | 30.5  | 31.5  | 29.6  | 28.4  |
| 5         | SD    | 1        | 1        | 2        | 2        | 2        | 1        | 3.4   | 2.7   | 4.0   | 3.7   | 3.6   | 2.7   |
|           | N     | 6        | 6        | 6        | 6        | 6        | 6        | 6     | 6     | 6     | 6     | 6     | 6     |
|           | %Diff | 0        | 0        | -1       | 0        | -3       | -1       | -8.1  | -8.2  | -6.1  | 1.2   | -1.4  | -6.8  |
| 3         | Mean  | 104      | 107      | 104      | 104      | 102      | 103      | 32.6  | 32.4  | 29.9  | 29.7  | 30.1  | 29.1  |
| 25        | SD    | 2        | 2        | 1        | 2        | 2        | 1        | 2.2   | 2.3   | 2.0   | 2.0   | 3.9   | 1.8   |
|           | N     | 6        | 6        | 6        | 6        | 6        | 6        | 6     | 6     | 6     | 6     | 6     | 6     |
|           | %Diff | 0        | 0        | 1        | 1        | -2       | 0        | -8.0  | -7.5  | -7.8  | -4.6  | 0.5   | -4.4  |
| 4         | Mean  | 103      | 106      | 101      | 105      | 101 *    | 103      | 34.8  | 35.4  | 34.9  | 35.8* | 34.1  | 32.5  |
| 100       | SD    | 1        | 3        | 1        | 2        | 1        | 2        | 2.6   | 3.1   | 1.4   | 4.0   | 2.1   | 1.5   |
|           | N     | 6        | 6        | 6        | 6        | 6        | 6        | 6     | 6     | 6     | 6     | 6     | 6     |
|           | %Diff | -1       | -1       | -2       | 1        | -3       | -1       | -1.7  | 0.9   | 7.5   | 15.2  | 13.6  | 6.8   |

[a] - Anova &amp; Dunnett: \* = p ≤ 0.05

Table 7 Summary of Chemistry-Pretest and Dosing Phase (Cont'd)

Day(s) Relative to Start Date

| Sex: Male |       | A/G   | A/G   | A/G   | A/G    | A/G    | A/G   | CK    | CK    | CK    | CK    | CK    | CK    |
|-----------|-------|-------|-------|-------|--------|--------|-------|-------|-------|-------|-------|-------|-------|
|           |       | [a]   | [a]   | [a]   | [a]    | [a]    | [a1]  | (U/L) | (U/L) | (U/L) | (U/L) | (U/L) | (U/L) |
|           |       |       |       |       |        |        |       | [a]   | [a2]  | [a2]  | [a]   | [a2]  | [a2]  |
|           |       | -11   | -6    | 53    | 87     | 123    | 179   | -11   | -6    | 53    | 87    | 123   | 179   |
| 1         | Mean  | 1.27  | 1.28  | 1.37  | 1.38   | 1.43   | 1.41  | 499   | 386   | 378   | 992   | 223   | 653   |
| 0         | SD    | 0.08  | 0.13  | 0.11  | 0.10   | 0.14   | 0.09  | 475   | 294   | 173   | 1541  | 52    | 454   |
|           | N     | 6     | 6     | 6     | 6      | 6      | 6     | 6     | 6     | 6     | 6     | 6     | 6     |
| 2         | Mean  | 1.36  | 1.38  | 1.44  | 1.39   | 1.48   | 1.52  | 481   | 302   | 509   | 1240  | 369   | 308   |
| 5         | SD    | 0.23  | 0.20  | 0.18  | 0.19   | 0.19   | 0.17  | 478   | 66    | 648   | 1677  | 190   | 198   |
|           | N     | 6     | 6     | 6     | 6      | 6      | 6     | 6     | 6     | 6     | 6     | 6     | 6     |
|           | %Diff | 7.11  | 8.14  | 5.25  | 0.68   | 3.13   | 7.55  | -4    | -22   | 35    | 25    | 65    | -53   |
| 3         | Mean  | 1.39  | 1.38  | 1.49  | 1.45   | 1.39   | 1.49* | 288   | 200   | 218   | 844   | 249   | 223   |
| 25        | SD    | 0.10  | 0.11  | 0.11  | 0.06   | 0.20   | 0.07  | 202   | 52    | 73    | 1278  | 154   | 86    |
|           | N     | 6     | 6     | 6     | 6      | 6      | 6     | 6     | 6     | 6     | 6     | 6     | 6     |
|           | %Diff | 9.12  | 8.33  | 9.18  | 4.75   | -2.65  | 5.18  | -42   | -48   | -42   | -15   | 12    | -66   |
| 4         | Mean  | 1.23  | 1.26  | 1.26  | 1.16*  | 1.26   | 1.33  | 349   | 268   | 253   | 1830  | 560   | 1035  |
| 100       | SD    | 0.16  | 0.14  | 0.09  | 0.16   | 0.13   | 0.05  | 160   | 121   | 40    | 3490  | 637   | 1903  |
|           | N     | 6     | 6     | 6     | 6      | 6      | 6     | 6     | 6     | 6     | 6     | 6     | 6     |
|           | %Diff | -3.16 | -1.06 | -8.18 | -15.81 | -12.23 | -5.81 | -30   | -31   | -33   | 84    | 151   | 58    |

[a] - Anova & Dunnett: \* = p ≤ 0.05

[a1] - Kruskal-Wallis & Dunnett on Ranks: \* = p ≤ 0.05

[a2] - Anova & Dunnett(Log)



Table 7 Summary of Chemistry-Pretest and Dosing Phase (Cont'd)

Day(s) Relative to Start Date

| Sex: Female |       | ALT   | ALT   | ALT   | ALT   | ALT   | ALT   | AST   | AST   | AST   | AST   | AST   | AST   |
|-------------|-------|-------|-------|-------|-------|-------|-------|-------|-------|-------|-------|-------|-------|
|             |       | (U/L) | (U/L) | (U/L) | (U/L) | (U/L) | (U/L) | (U/L) | (U/L) | (U/L) | (U/L) | (U/L) | (U/L) |
|             |       | [a]   | [a]   | [a]   | [a]   | [a1]  | [a]   | [a]   | [a]   | [a]   | [a]   | [a]   | [a1]  |
|             |       | -12   | -7    | 52    | 86    | 122   | 178   | -12   | -7    | 52    | 86    | 122   | 178   |
| 1           | Mean  | 54    | 57    | 52    | 57    | 50    | 48    | 57    | 61    | 50    | 90    | 51    | 56    |
| 0           | SD    | 18    | 15    | 6     | 9     | 15    | 8     | 15    | 21    | 9     | 18    | 13    | 19    |
| mg/kg/dose  | N     | 6     | 6     | 6     | 6     | 6     | 6     | 6     | 6     | 6     | 6     | 6     | 6     |
| 2           | Mean  | 50    | 57    | 49    | 64    | 75    | 48    | 52    | 57    | 44    | 92    | 55    | 65    |
| 5           | SD    | 11    | 14    | 10    | 17    | 72    | 11    | 16    | 21    | 8     | 37    | 31    | 33    |
| mg/kg/dose  | N     | 6     | 6     | 6     | 6     | 6     | 6     | 6     | 6     | 6     | 6     | 6     | 6     |
|             | %Diff | -7    | 0     | -5    | 12    | 51    | 1     | -9    | -6    | -13   | 2     | 7     | 15    |
| 3           | Mean  | 48    | 57    | 43    | 50    | 37    | 45    | 62    | 66    | 58    | 75    | 41    | 50    |
| 25          | SD    | 20    | 23    | 10    | 17    | 12    | 13    | 18    | 22    | 32    | 31    | 7     | 17    |
| mg/kg/dose  | N     | 6     | 6     | 6     | 6     | 6     | 6     | 6     | 6     | 6     | 6     | 6     | 6     |
|             | %Diff | -10   | 0     | -17   | -12   | -26   | -5    | 8     | 9     | 15    | -17   | -19   | -11   |
| 4           | Mean  | 58    | 54    | 60    | 60    | 57    | 61    | 45    | 48    | 41    | 59    | 38    | 48    |
| 100         | SD    | 16    | 9     | 15    | 14    | 19    | 19    | 11    | 21    | 12    | 12    | 9     | 12    |
| mg/kg/dose  | N     | 6     | 6     | 6     | 6     | 6     | 6     | 6     | 6     | 6     | 6     | 6     | 6     |
|             | %Diff | 9     | -4    | 16    | 5     | 14    | 28    | -22   | -20   | -18   | -34   | -25   | -15   |

[a] - Anova &amp; Dunnett

[a1] - Anova &amp; Dunnett(Log)

Table 7 Summary of Chemistry-Pretest and Dosing Phase (Cont'd)

Day(s) Relative to Start Date

| Sex: Female |       | TP    | TP    | TP    | TP    | TP    | TP    | ALB   | ALB   | ALB   | ALB   | ALB   | ALB   |
|-------------|-------|-------|-------|-------|-------|-------|-------|-------|-------|-------|-------|-------|-------|
|             |       | (g/L) | (g/L) | (g/L) | (g/L) | (g/L) | (g/L) | (g/L) | (g/L) | (g/L) | (g/L) | (g/L) | (g/L) |
|             |       | [a]   | [a]   | [a]   | [a]   | [a]   | [a]   | [a]   | [a]   | [a]   | [a]   | [a]   | [a]   |
|             |       | -12   | -7    | 52    | 86    | 122   | 178   | -12   | -7    | 52    | 86    | 122   | 178   |
| 1           | Mean  | 80.6  | 80.5  | 78.5  | 76.8  | 76.5  | 75.9  | 43.8  | 44.5  | 44.4  | 43.3  | 43.0  | 43.2  |
| 0           | SD    | 2.7   | 2.5   | 4.8   | 3.9   | 2.4   | 5.8   | 2.5   | 2.5   | 2.3   | 2.0   | 1.9   | 2.1   |
|             | N     | 6     | 6     | 6     | 6     | 6     | 6     | 6     | 6     | 6     | 6     | 6     | 6     |
| 2           | Mean  | 80.9  | 80.8  | 77.9  | 76.0  | 76.7  | 75.2  | 41.7  | 42.8  | 42.8  | 42.0  | 40.0  | 42.1  |
| 5           | SD    | 4.1   | 1.8   | 5.0   | 1.8   | 5.5   | 3.1   | 2.2   | 1.7   | 2.7   | 1.7   | 4.6   | 1.4   |
|             | N     | 6     | 6     | 6     | 6     | 6     | 6     | 6     | 6     | 6     | 6     | 6     | 6     |
|             | %Diff | 0.4   | 0.4   | -0.7  | -1.0  | 0.3   | -0.9  | -4.8  | -3.9  | -3.7  | -3.1  | -6.8  | -2.5  |
| 3           | Mean  | 79.3  | 79.4  | 77.1  | 73.9  | 76.4  | 75.1  | 43.0  | 44.1  | 43.4  | 41.2  | 42.2  | 42.3  |
| 25          | SD    | 3.5   | 3.7   | 2.3   | 3.7   | 2.3   | 3.4   | 2.2   | 2.7   | 2.3   | 1.5   | 2.1   | 1.4   |
|             | N     | 6     | 6     | 6     | 6     | 6     | 6     | 6     | 6     | 6     | 6     | 6     | 6     |
|             | %Diff | -1.6  | -1.3  | -1.7  | -3.8  | -0.2  | -1.1  | -1.9  | -0.9  | -2.2  | -4.9  | -1.7  | -2.1  |
| 4           | Mean  | 74.8* | 76.2  | 75.4  | 75.1  | 76.8  | 74.8  | 42.1  | 42.9  | 42.7  | 41.5  | 42.9  | 42.9  |
| 100         | SD    | 4.3   | 4.3   | 3.5   | 3.7   | 3.3   | 6.0   | 2.5   | 2.2   | 1.5   | 1.1   | 1.8   | 2.1   |
|             | N     | 6     | 6     | 6     | 6     | 6     | 6     | 6     | 6     | 6     | 6     | 6     | 6     |
|             | %Diff | -7.4  | -5.2  | -3.9  | -2.1  | 0.4   | -1.5  | -4.0  | -3.6  | -3.8  | -4.1  | -0.3  | -0.8  |

[a] - Anova &amp; Dunnett: \* = p ≤ 0.05

Table 7 Summary of Chemistry-Pretest and Dosing Phase (Cont'd)

Day(s) Relative to Start Date

| Sex: Female |       | TBIL     | TBIL     | TBIL     | TBIL     | TBIL     | TBIL     | ALP   | ALP   | ALP   | ALP   | ALP   | ALP   |
|-------------|-------|----------|----------|----------|----------|----------|----------|-------|-------|-------|-------|-------|-------|
|             |       | (µmol/L) | (µmol/L) | (µmol/L) | (µmol/L) | (µmol/L) | (µmol/L) | (U/L) | (U/L) | (U/L) | (U/L) | (U/L) | (U/L) |
|             |       | [a]      | [a]      | [a]      | [a]      | [a]      | [a]      | [a]   | [a]   | [a]   | [a]   | [a]   | [a]   |
|             |       | -12      | -7       | 52       | 86       | 122      | 178      | -12   | -7    | 52    | 86    | 122   | 178   |
| 1           | Mean  | 4.61     | 5.07     | 4.72     | 5.01     | 4.61     | 5.08     | 423   | 436   | 450   | 488   | 434   | 438   |
| 0           | SD    | 1.50     | 1.85     | 2.18     | 2.19     | 1.93     | 2.49     | 122   | 129   | 109   | 116   | 126   | 139   |
| mg/kg/dose  | N     | 6        | 6        | 6        | 6        | 6        | 6        | 6     | 6     | 6     | 6     | 6     | 6     |
| 2           | Mean  | 4.10     | 4.43     | 4.60     | 4.93     | 6.70     | 4.70     | 437   | 436   | 538   | 611   | 550   | 558   |
| 5           | SD    | 0.46     | 0.56     | 1.28     | 1.28     | 4.55     | 1.10     | 61    | 47    | 64    | 50    | 44    | 37    |
| mg/kg/dose  | N     | 6        | 6        | 6        | 6        | 6        | 6        | 6     | 6     | 6     | 6     | 6     | 6     |
|             | %Diff | -11.06   | -12.53   | -2.61    | -1.63    | 45.46    | -7.49    | 3     | 0     | 20    | 25    | 27    | 27    |
| 3           | Mean  | 4.97     | 5.33     | 4.26     | 5.55     | 5.28     | 4.51     | 474   | 468   | 517   | 553   | 488   | 494   |
| 25          | SD    | 1.07     | 1.02     | 1.24     | 1.75     | 2.17     | 1.70     | 131   | 143   | 151   | 147   | 143   | 137   |
| mg/kg/dose  | N     | 6        | 6        | 6        | 6        | 6        | 6        | 6     | 6     | 6     | 6     | 6     | 6     |
|             | %Diff | 7.84     | 5.16     | -9.81    | 10.78    | 14.73    | -11.07   | 12    | 7     | 15    | 13    | 13    | 13    |
| 4           | Mean  | 4.16     | 4.89     | 4.55     | 4.86     | 5.16     | 5.12     | 454   | 461   | 419   | 467   | 455   | 446   |
| 100         | SD    | 2.09     | 1.58     | 1.74     | 1.59     | 1.82     | 1.47     | 121   | 118   | 82    | 102   | 121   | 108   |
| mg/kg/dose  | N     | 6        | 6        | 6        | 6        | 6        | 6        | 6     | 6     | 6     | 6     | 6     | 6     |
|             | %Diff | -9.79    | -3.62    | -3.60    | -2.93    | 12.12    | 0.85     | 7     | 6     | -7    | -4    | 5     | 2     |

[a] - Anova & Dunnett

Table 7 Summary of Chemistry-Pretest and Dosing Phase (Cont'd)

Day(s) Relative to Start Date

| Sex: Female |       | GGT   | GGT   | GGT   | GGT   | GGT   | GGT   | sGLU     | sGLU     | sGLU     | sGLU     | sGLU     | sGLU     |
|-------------|-------|-------|-------|-------|-------|-------|-------|----------|----------|----------|----------|----------|----------|
|             |       | (U/L) | (U/L) | (U/L) | (U/L) | (U/L) | (U/L) | (mmol/L) | (mmol/L) | (mmol/L) | (mmol/L) | (mmol/L) | (mmol/L) |
|             |       | [a]   | [a]   | [a1]  | [a]   | [a1]  | [a1]  | [a2]     | [a2]     | [a2]     | [a2]     | [a2]     | [a2]     |
|             |       | -12   | -7    | 52    | 86    | 122   | 178   | -12      | -7       | 52       | 86       | 122      | 178      |
| 1           | Mean  | 52    | 52    | 51    | 52    | 53    | 51    | 3.46     | 3.76     | 3.84     | 3.23     | 3.96     | 3.76     |
| 0           | SD    | 5     | 5     | 7     | 7     | 6     | 7     | 0.97     | 0.49     | 0.95     | 0.67     | 0.79     | 0.94     |
|             | N     | 6     | 6     | 6     | 6     | 6     | 6     | 6        | 6        | 6        | 6        | 6        | 6        |
| 2           | Mean  | 74    | 74    | 80    | 78    | 79    | 76    | 3.34     | 3.68     | 3.39     | 2.91     | 3.39     | 3.04     |
| 5           | SD    | 31    | 31    | 35    | 31    | 22    | 27    | 0.34     | 0.44     | 0.45     | 0.31     | 0.42     | 0.64     |
|             | N     | 6     | 6     | 6     | 6     | 6     | 6     | 6        | 6        | 6        | 6        | 6        | 6        |
|             | %Diff | 43    | 43    | 57    | 51    | 49    | 50    | -3.33    | -2.17    | -11.60   | -9.87    | -14.52   | -19.31   |
| 3           | Mean  | 44    | 45    | 45    | 44    | 46    | 46    | 2.89     | 3.69     | 3.47     | 2.66     | 3.23     | 3.12     |
| 25          | SD    | 9     | 11    | 11    | 9     | 10    | 10    | 0.76     | 0.58     | 0.26     | 0.21     | 0.46     | 0.54     |
|             | N     | 6     | 6     | 6     | 6     | 6     | 6     | 6        | 6        | 6        | 6        | 6        | 6        |
|             | %Diff | -14   | -13   | -11   | -15   | -13   | -10   | -16.40   | -1.82    | -9.51    | -17.56   | -18.52   | -17.05   |
| 4           | Mean  | 69    | 65    | 64    | 64    | 67    | 62    | 3.51     | 3.31     | 3.55     | 3.34     | 3.36     | 3.31     |
| 100         | SD    | 29    | 28    | 23    | 23    | 21    | 21    | 0.98     | 0.66     | 0.73     | 1.06     | 0.67     | 1.17     |
|             | N     | 6     | 6     | 6     | 6     | 6     | 6     | 6        | 6        | 6        | 6        | 6        | 6        |
|             | %Diff | 33    | 26    | 25    | 24    | 26    | 22    | 1.64     | -11.96   | -7.47    | 3.56     | -15.11   | -11.96   |

[a] - Kruskal-Wallis &amp; Dunnett on Ranks

[a1] - Anova &amp; Dunnett(Log)

[a2] - Anova &amp; Dunnett

Table 7 Summary of Chemistry-Pretest and Dosing Phase (Cont'd)

Day(s) Relative to Start Date

| Sex: Female |       | UREA     | UREA     | UREA     | UREA     | UREA     | UREA     | CRE            | CRE            | CRE            | CRE            | CRE            | CRE            |
|-------------|-------|----------|----------|----------|----------|----------|----------|----------------|----------------|----------------|----------------|----------------|----------------|
|             |       | (mmol/L) | (mmol/L) | (mmol/L) | (mmol/L) | (mmol/L) | (mmol/L) | ( $\mu$ mol/L) | ( $\mu$ mol/L) | ( $\mu$ mol/L) | ( $\mu$ mol/L) | ( $\mu$ mol/L) | ( $\mu$ mol/L) |
|             |       | [a]      | [a]      | [a]      | [a]      | [a]      | [a]      | [a]            | [a]            | [a]            | [a]            | [a]            | [a]            |
|             |       | -12      | -7       | 52       | 86       | 122      | 178      | -12            | -7             | 52             | 86             | 122            | 178            |
| 1           | Mean  | 6.18     | 5.65     | 6.32     | 7.09     | 6.85     | 6.90     | 54             | 58             | 58             | 59             | 61             | 60             |
| 0           | SD    | 1.06     | 0.79     | 0.46     | 1.33     | 0.87     | 1.64     | 6              | 6              | 10             | 9              | 6              | 8              |
| mg/kg/dose  | N     | 6        | 6        | 6        | 6        | 6        | 6        | 6              | 6              | 6              | 6              | 6              | 6              |
| 2           | Mean  | 5.90     | 5.10     | 6.64     | 7.01     | 7.29     | 7.17     | 56             | 59             | 62             | 63             | 69             | 66             |
| 5           | SD    | 1.21     | 1.13     | 0.57     | 1.78     | 0.57     | 1.03     | 7              | 8              | 7              | 5              | 10             | 12             |
| mg/kg/dose  | N     | 6        | 6        | 6        | 6        | 6        | 6        | 6              | 6              | 6              | 6              | 6              | 6              |
|             | %Diff | -4.56    | -9.68    | 5.14     | -1.06    | 6.52     | 3.99     | 5              | 1              | 7              | 7              | 12             | 10             |
| 3           | Mean  | 6.68     | 5.28     | 6.28     | 6.65     | 6.47     | 6.62     | 56             | 61             | 60             | 59             | 60             | 59             |
| 25          | SD    | 1.65     | 0.74     | 0.75     | 1.00     | 0.65     | 1.13     | 5              | 4              | 8              | 7              | 6              | 5              |
| mg/kg/dose  | N     | 6        | 6        | 6        | 6        | 6        | 6        | 6              | 6              | 6              | 6              | 6              | 6              |
|             | %Diff | 8.09     | -6.61    | -0.55    | -6.19    | -5.55    | -4.04    | 5              | 5              | 3              | 0              | -2             | -1             |
| 4           | Mean  | 6.08     | 5.64     | 6.63     | 6.56     | 7.81     | 7.30     | 54             | 58             | 59             | 59             | 65             | 62             |
| 100         | SD    | 2.08     | 1.42     | 1.12     | 1.50     | 1.74     | 1.37     | 7              | 8              | 7              | 8              | 11             | 10             |
| mg/kg/dose  | N     | 6        | 6        | 6        | 6        | 6        | 6        | 6              | 6              | 6              | 6              | 6              | 6              |
|             | %Diff | -1.62    | -0.21    | 4.93     | -7.48    | 14.00    | 5.85     | 0              | -1             | 2              | 0              | 5              | 4              |

[a] - Anova &amp; Dunnett

Table 7 Summary of Chemistry-Pretest and Dosing Phase (Cont'd)

Day(s) Relative to Start Date

| Sex: Female |       | Ca       | Ca       | Ca       | Ca       | Ca       | Ca       | P        | P        | P        | P        | P        | P        |
|-------------|-------|----------|----------|----------|----------|----------|----------|----------|----------|----------|----------|----------|----------|
|             |       | (mmol/L) | (mmol/L) | (mmol/L) | (mmol/L) | (mmol/L) | (mmol/L) | (mmol/L) | (mmol/L) | (mmol/L) | (mmol/L) | (mmol/L) | (mmol/L) |
|             |       | [a]      | [a]      | [a]      | [a]      | [a]      | [a]      | [a]      | [a]      | [a]      | [a1]     | [a1]     | [a]      |
|             |       | -12      | -7       | 52       | 86       | 122      | 178      | -12      | -7       | 52       | 86       | 122      | 178      |
| 1           | Mean  | 2.56     | 2.75     | 2.65     | 2.52     | 2.53     | 2.51     | 1.83     | 1.95     | 1.93     | 1.82     | 1.94     | 1.91     |
| 0           | SD    | 0.10     | 0.30     | 0.08     | 0.10     | 0.10     | 0.16     | 0.26     | 0.17     | 0.10     | 0.11     | 0.07     | 0.18     |
| mg/kg/dose  | N     | 6        | 6        | 6        | 6        | 6        | 6        | 6        | 6        | 6        | 6        | 6        | 6        |
| 2           | Mean  | 2.51     | 2.62     | 2.55     | 2.48     | 2.44     | 2.44     | 1.73     | 1.82     | 1.96     | 1.68     | 1.85     | 2.03     |
| 5           | SD    | 0.09     | 0.06     | 0.11     | 0.06     | 0.11     | 0.06     | 0.23     | 0.12     | 0.18     | 0.20     | 0.26     | 0.24     |
| mg/kg/dose  | N     | 6        | 6        | 6        | 6        | 6        | 6        | 6        | 6        | 6        | 6        | 6        | 6        |
|             | %Diff | -2.02    | -4.79    | -3.84    | -1.59    | -3.50    | -2.92    | -5.29    | -6.68    | 1.38     | -7.61    | -4.72    | 6.27     |
| 3           | Mean  | 2.49     | 2.77     | 2.59     | 2.45     | 2.45     | 2.43     | 1.79     | 2.02     | 2.03     | 1.82     | 1.97     | 2.04     |
| 25          | SD    | 0.08     | 0.26     | 0.13     | 0.08     | 0.12     | 0.10     | 0.18     | 0.09     | 0.32     | 0.17     | 0.15     | 0.11     |
| mg/kg/dose  | N     | 6        | 6        | 6        | 6        | 6        | 6        | 6        | 6        | 6        | 6        | 6        | 6        |
|             | %Diff | -2.87    | 0.85     | -2.20    | -2.91    | -3.23    | -3.12    | -2.28    | 3.85     | 5.35     | 0.00     | 1.54     | 6.45     |
| 4           | Mean  | 2.48     | 2.62     | 2.57     | 2.48     | 2.47     | 2.44     | 1.71     | 1.90     | 1.79     | 1.75     | 1.90     | 1.98     |
| 100         | SD    | 0.13     | 0.12     | 0.09     | 0.13     | 0.13     | 0.20     | 0.24     | 0.23     | 0.22     | 0.31     | 0.36     | 0.30     |
| mg/kg/dose  | N     | 6        | 6        | 6        | 6        | 6        | 6        | 6        | 6        | 6        | 6        | 6        | 6        |
|             | %Diff | -2.93    | -4.85    | -3.14    | -1.59    | -2.18    | -2.92    | -6.75    | -2.57    | -7.25    | -3.49    | -2.49    | 3.66     |

[a] - Anova &amp; Dunnett

[a1] - Kruskal-Wallis &amp; Dunnett on Ranks

Table 7 Summary of Chemistry-Pretest and Dosing Phase (Cont'd)

Day(s) Relative to Start Date

| Sex: Female |       | TCHO     | TCHO     | TCHO     | TCHO     | TCHO     | TCHO     | TG       | TG       | TG       | TG       | TG       | TG       |
|-------------|-------|----------|----------|----------|----------|----------|----------|----------|----------|----------|----------|----------|----------|
|             |       | (mmol/L) | (mmol/L) | (mmol/L) | (mmol/L) | (mmol/L) | (mmol/L) | (mmol/L) | (mmol/L) | (mmol/L) | (mmol/L) | (mmol/L) | (mmol/L) |
|             |       | [a]      | [a]      | [a]      | [a]      | [a]      | [a]      | [a]      | [a]      | [a]      | [a]      | [a]      | [a]      |
|             |       | -12      | -7       | 52       | 86       | 122      | 178      | -12      | -7       | 52       | 86       | 122      | 178      |
| 1           | Mean  | 3.66     | 3.43     | 4.01     | 3.81     | 4.12     | 3.89     | 0.43     | 0.39     | 0.59     | 0.62     | 0.62     | 0.52     |
| 0           | SD    | 0.92     | 0.80     | 0.65     | 0.83     | 0.70     | 0.78     | 0.06     | 0.08     | 0.15     | 0.16     | 0.12     | 0.15     |
|             | N     | 6        | 6        | 6        | 6        | 6        | 6        | 6        | 6        | 6        | 6        | 6        | 6        |
| 2           | Mean  | 3.90     | 3.49     | 3.86     | 3.60     | 4.48     | 3.69     | 0.39     | 0.32     | 0.46     | 0.45     | 0.63     | 0.40     |
| 5           | SD    | 0.54     | 0.82     | 0.73     | 0.69     | 1.41     | 0.64     | 0.10     | 0.05     | 0.14     | 0.08     | 0.37     | 0.15     |
|             | N     | 6        | 6        | 6        | 6        | 6        | 6        | 6        | 6        | 6        | 6        | 6        | 6        |
|             | %Diff | 6.70     | 1.60     | -3.66    | -5.56    | 8.86     | -5.31    | -9.30    | -19.49   | -22.82   | -26.83   | 0.80     | -23.00   |
| 3           | Mean  | 3.38     | 3.32     | 3.59     | 3.52     | 3.85     | 3.62     | 0.41     | 0.34     | 0.46     | 0.40*    | 0.45     | 0.37     |
| 25          | SD    | 0.97     | 0.92     | 0.99     | 1.09     | 1.22     | 1.17     | 0.15     | 0.19     | 0.13     | 0.09     | 0.17     | 0.11     |
|             | N     | 6        | 6        | 6        | 6        | 6        | 6        | 6        | 6        | 6        | 6        | 6        | 6        |
|             | %Diff | -7.66    | -3.30    | -10.56   | -7.57    | -6.52    | -6.98    | -4.65    | -12.71   | -23.10   | -34.96   | -27.35   | -29.71   |
| 4           | Mean  | 3.42     | 3.31     | 3.57     | 3.38     | 3.59     | 3.41     | 0.38     | 0.39     | 0.48     | 0.42*    | 0.52     | 0.49     |
| 100         | SD    | 0.68     | 0.85     | 0.59     | 0.55     | 0.51     | 0.63     | 0.11     | 0.09     | 0.12     | 0.15     | 0.14     | 0.12     |
|             | N     | 6        | 6        | 6        | 6        | 6        | 6        | 6        | 6        | 6        | 6        | 6        | 6        |
|             | %Diff | -6.34    | -3.69    | -10.93   | -11.24   | -12.95   | -12.37   | -10.85   | -1.69    | -18.59   | -31.71   | -16.35   | -6.71    |

[a] - Anova &amp; Dunnett: \* = p ≤ 0.05

Table 7 Summary of Chemistry-Pretest and Dosing Phase (Cont'd)

Day(s) Relative to Start Date

| Sex: Female |       | K        | K        | K        | K        | K        | K        | Na       | Na       | Na       | Na       | Na       | Na       |
|-------------|-------|----------|----------|----------|----------|----------|----------|----------|----------|----------|----------|----------|----------|
|             |       | (mmol/L) | (mmol/L) | (mmol/L) | (mmol/L) | (mmol/L) | (mmol/L) | (mmol/L) | (mmol/L) | (mmol/L) | (mmol/L) | (mmol/L) | (mmol/L) |
|             |       | [a]      | [a1]     | [a]      | [a]      | [a]      | [a]      | [a]      | [a]      | [a]      | [a]      | [a]      | [a]      |
|             |       | -12      | -7       | 52       | 86       | 122      | 178      | -12      | -7       | 52       | 86       | 122      | 178      |
| 1           | Mean  | 5.0      | 5.0      | 5.1      | 4.9      | 4.9      | 5.0      | 149      | 152      | 147      | 149      | 145      | 147      |
| 0           | SD    | 0.7      | 0.3      | 0.5      | 0.5      | 0.3      | 0.8      | 3        | 1        | 4        | 1        | 1        | 4        |
| mg/kg/dose  | N     | 6        | 6        | 6        | 6        | 6        | 6        | 6        | 6        | 6        | 6        | 6        | 6        |
| 2           | Mean  | 4.6      | 4.7      | 4.7      | 4.7      | 4.4      | 4.7      | 149      | 152      | 148      | 149      | 146      | 146      |
| 5           | SD    | 0.5      | 0.2      | 0.5      | 0.4      | 0.6      | 0.4      | 2        | 2        | 4        | 1        | 2        | 2        |
| mg/kg/dose  | N     | 6        | 6        | 6        | 6        | 6        | 6        | 6        | 6        | 6        | 6        | 6        | 6        |
|             | %Diff | -9.3     | -6.0     | -8.8     | -4.1     | -10.2    | -6.0     | 0        | 0        | 0        | 0        | 1        | -1       |
| 3           | Mean  | 4.3      | 5.3      | 5.1      | 4.6      | 4.9      | 4.6      | 149      | 154      | 147      | 149      | 146      | 146      |
| 25          | SD    | 0.3      | 0.8      | 0.4      | 0.5      | 0.4      | 0.4      | 1        | 3        | 4        | 3        | 3        | 1        |
| mg/kg/dose  | N     | 6        | 6        | 6        | 6        | 6        | 6        | 6        | 6        | 6        | 6        | 6        | 6        |
|             | %Diff | -14.0    | 5.6      | -1.0     | -5.4     | -0.3     | -7.3     | 0        | 1        | 0        | 0        | 1        | 0        |
| 4           | Mean  | 4.8      | 4.8      | 4.7      | 4.7      | 4.5      | 4.7      | 151      | 152      | 147      | 147      | 147      | 147      |
| 100         | SD    | 0.4      | 0.6      | 0.3      | 0.6      | 0.4      | 0.6      | 3        | 3        | 3        | 4        | 3        | 5        |
| mg/kg/dose  | N     | 6        | 6        | 6        | 6        | 6        | 6        | 6        | 6        | 6        | 6        | 6        | 6        |
|             | %Diff | -5.3     | -4.0     | -7.5     | -5.1     | -8.5     | -7.0     | 1        | 0        | 0        | -1       | 1        | 0        |

[a] - Anova & Dunnett

[a1] - Kruskal-Wallis & Dunnett on Ranks



Table 7 Summary of Chemistry-Pretest and Dosing Phase (Cont'd)

Day(s) Relative to Start Date

| Sex: Female |       | Cl       | Cl       | Cl       | Cl       | Cl       | Cl       | GLB   | GLB   | GLB   | GLB   | GLB   | GLB   |
|-------------|-------|----------|----------|----------|----------|----------|----------|-------|-------|-------|-------|-------|-------|
|             |       | (mmol/L) | (mmol/L) | (mmol/L) | (mmol/L) | (mmol/L) | (mmol/L) | (g/L) | (g/L) | (g/L) | (g/L) | (g/L) | (g/L) |
|             |       | [a]      | [a]      | [a]      | [a]      | [a]      | [a]      | [a]   | [a]   | [a]   | [a]   | [a]   | [a]   |
|             |       | -12      | -7       | 52       | 86       | 122      | 178      | -12   | -7    | 52    | 86    | 122   | 178   |
| 1           | Mean  | 104      | 107      | 104      | 106      | 102      | 104      | 36.8  | 36.0  | 34.1  | 33.5  | 33.6  | 32.7  |
| 0           | SD    | 1        | 2        | 3        | 2        | 3        | 2        | 2.8   | 2.7   | 4.3   | 3.9   | 3.9   | 5.7   |
|             | N     | 6        | 6        | 6        | 6        | 6        | 6        | 6     | 6     | 6     | 6     | 6     | 6     |
| 2           | Mean  | 104      | 107      | 104      | 106      | 102      | 103      | 39.2  | 38.0  | 35.2  | 34.1  | 36.7  | 33.1  |
| 5           | SD    | 3        | 2        | 1        | 2        | 2        | 0        | 3.4   | 2.3   | 2.6   | 1.2   | 1.3   | 2.0   |
|             | N     | 6        | 6        | 6        | 6        | 6        | 6        | 6     | 6     | 6     | 6     | 6     | 6     |
|             | %Diff | 1        | 0        | 0        | 0        | 0        | -1       | 6.6   | 5.7   | 3.2   | 1.8   | 9.3   | 1.2   |
| 3           | Mean  | 104      | 108      | 104      | 107      | 103      | 104      | 36.3  | 35.3  | 33.7  | 32.7  | 34.2  | 32.8  |
| 25          | SD    | 2        | 2        | 2        | 2        | 2        | 2        | 3.4   | 2.7   | 2.4   | 4.1   | 3.0   | 3.4   |
|             | N     | 6        | 6        | 6        | 6        | 6        | 6        | 6     | 6     | 6     | 6     | 6     | 6     |
|             | %Diff | 0        | 1        | 0        | 1        | 0        | 0        | -1.2  | -1.8  | -1.2  | -2.2  | 1.9   | 0.2   |
| 4           | Mean  | 106      | 108      | 104      | 105      | 103      | 104      | 32.5  | 33.4  | 32.7  | 33.6  | 34.0  | 31.9  |
| 100         | SD    | 2        | 2        | 2        | 1        | 2        | 2        | 2.8   | 2.8   | 2.6   | 2.6   | 2.0   | 4.4   |
|             | N     | 6        | 6        | 6        | 6        | 6        | 6        | 6     | 6     | 6     | 6     | 6     | 6     |
|             | %Diff | 3        | 0        | 0        | -1       | 0        | 0        | -11.5 | -7.2  | -4.1  | 0.3   | 1.2   | -2.5  |

[a] - Anova &amp; Dunnett

Table 7 Summary of Chemistry-Pretest and Dosing Phase (Cont'd)

Day(s) Relative to Start Date

| Sex: Female |       | A/G    | A/G   | A/G   | A/G   | A/G    | A/G   | CK    | CK    | CK    | CK    | CK    | CK    |
|-------------|-------|--------|-------|-------|-------|--------|-------|-------|-------|-------|-------|-------|-------|
|             |       | [a]    | [a]   | [a]   | [a1]  | [a]    | [a1]  | (U/L) | (U/L) | (U/L) | (U/L) | (U/L) | (U/L) |
|             |       |        |       |       |       |        |       | [a]   | [a]   | [a2]  | [a]   | [a]   | [a1]  |
|             |       | -12    | -7    | 52    | 86    | 122    | 178   | -12   | -7    | 52    | 86    | 122   | 178   |
| 1           | Mean  | 1.20   | 1.24  | 1.32  | 1.31  | 1.30   | 1.35  | 318   | 259   | 382   | 568   | 401   | 215   |
| 0           | SD    | 0.13   | 0.14  | 0.17  | 0.16  | 0.19   | 0.22  | 135   | 100   | 311   | 187   | 445   | 51    |
|             | N     | 6      | 6     | 6     | 6     | 6      | 6     | 6     | 6     | 6     | 6     | 6     | 6     |
| 2           | Mean  | 1.07   | 1.13  | 1.22  | 1.23  | 1.09   | 1.28  | 403   | 362   | 263   | 973   | 406   | 1602  |
| 5           | SD    | 0.10   | 0.10  | 0.06  | 0.07  | 0.11   | 0.06  | 230   | 174   | 83    | 486   | 159   | 2067  |
|             | N     | 6      | 6     | 6     | 6     | 6      | 6     | 6     | 6     | 6     | 6     | 6     | 6     |
|             | %Diff | -10.77 | -9.31 | -7.72 | -5.80 | -16.05 | -5.71 | 27    | 40    | -31   | 71    | 1     | 645   |
| 3           | Mean  | 1.20   | 1.25  | 1.30  | 1.28  | 1.25   | 1.30  | 301   | 418   | 1129  | 566   | 260   | 301   |
| 25          | SD    | 0.15   | 0.13  | 0.14  | 0.18  | 0.15   | 0.15  | 138   | 271   | 2081  | 403   | 116   | 206   |
|             | N     | 6      | 6     | 6     | 6     | 6      | 6     | 6     | 6     | 6     | 6     | 6     | 6     |
|             | %Diff | -0.36  | 0.73  | -1.71 | -2.45 | -4.08  | -3.59 | -5    | 62    | 195   | 0     | -35   | 40    |
| 4           | Mean  | 1.30   | 1.29  | 1.31  | 1.24  | 1.26   | 1.36  | 365   | 410   | 467   | 648   | 291   | 920   |
| 100         | SD    | 0.10   | 0.09  | 0.10  | 0.06  | 0.06   | 0.15  | 80    | 250   | 366   | 200   | 100   | 1026  |
|             | N     | 6      | 6     | 6     | 6     | 6      | 6     | 6     | 6     | 6     | 6     | 6     | 6     |
|             | %Diff | 8.26   | 3.62  | -0.47 | -5.22 | -2.62  | 0.59  | 15    | 58    | 22    | 14    | -28   | 328   |

[a] - Anova & Dunnett  
 [a1] - Kruskal-Wallis & Dunnett on Ranks  
 [a2] - Anova & Dunnett(Log)

Table 7 Summary of Chemistry-Recovery Phase

Day: 209 Relative to Start Date

| Sex: Female |       | ALT   | AST   | TP    | ALB   | TBIL           | ALP   | GGT   | sGLU     | UREA     | CRE            | Ca       | P        |
|-------------|-------|-------|-------|-------|-------|----------------|-------|-------|----------|----------|----------------|----------|----------|
|             |       | (U/L) | (U/L) | (g/L) | (g/L) | ( $\mu$ mol/L) | (U/L) | (U/L) | (mmol/L) | (mmol/L) | ( $\mu$ mol/L) | (mmol/L) | (mmol/L) |
| 1           | Mean  | 44    | 38    | 79.9  | 47.2  | 4.31           | 473   | 54    | 4.08     | 8.34     | 61             | 2.72     | 1.93     |
| 0           | SD    | 6     | 8     | 1.6   | 4.3   | 0.76           | 21    | 8     | 0.39     | 2.97     | 6              | 0.24     | 0.26     |
|             | N     | 2     | 2     | 2     | 2     | 2              | 2     | 2     | 2        | 2        | 2              | 2        | 2        |
| 2           | Mean  | 41    | 36    | 75.5  | 44.2  | 4.84           | 548   | 90    | 3.00     | 6.74     | 59             | 2.56     | 1.74     |
| 5           | SD    | 17    | 11    | 1.5   | 1.1   | 1.39           | 51    | 40    | 0.25     | 1.15     | 6              | 0.04     | 0.08     |
|             | N     | 2     | 2     | 2     | 2     | 2              | 2     | 2     | 2        | 2        | 2              | 2        | 2        |
|             | %Diff | -6    | -4    | -5.6  | -6.3  | 12.43          | 16    | 68    | -26.50   | -19.24   | -4             | -5.88    | -9.61    |
| 3           | Mean  | 51    | 40    | 74.8  | 43.1  | 5.48           | 572   | 42    | 2.99     | 6.80     | 62             | 2.54     | 1.89     |
| 25          | SD    | 1     | 8     | 3.0   | 0.3   | 0.30           | 27    | 17    | 0.21     | 0.06     | 11             | 0.09     | 0.12     |
|             | N     | 2     | 2     | 2     | 2     | 2              | 2     | 2     | 2        | 2        | 2              | 2        | 2        |
|             | %Diff | 16    | 5     | -6.4  | -8.6  | 27.18          | 21    | -21   | -26.75   | -18.53   | 1              | -6.80    | -2.08    |
| 4           | Mean  | 58    | 34    | 71.7  | 43.2  | 5.49           | 485   | 50    | 2.58     | 8.84     | 55             | 2.47     | 2.18     |
| 100         | SD    | 8     | 5     | 3.5   | 1.5   | 0.47           | 59    | 24    | 0.62     | 0.64     | 6              | 0.22     | 0.12     |
|             | N     | 2     | 2     | 2     | 2     | 2              | 2     | 2     | 2        | 2        | 2              | 2        | 2        |
|             | %Diff | 32    | -11   | -10.3 | -8.5  | 27.53          | 3     | -7    | -36.69   | 5.94     | -10            | -9.38    | 12.99    |

Table 7 Summary of Chemistry-Recovery Phase (Cont'd)

Day: 209 Relative to Start Date

| Sex: Female |       | TCHO     | TG       | K        | Na       | Cl       | GLB   | A/G   | CK    |
|-------------|-------|----------|----------|----------|----------|----------|-------|-------|-------|
|             |       | (mmol/L) | (mmol/L) | (mmol/L) | (mmol/L) | (mmol/L) | (g/L) |       | (U/L) |
| 1           | Mean  | 4.19     | 0.55     | 5.4      | 150      | 106      | 32.8  | 1.45  | 386   |
| 0           | SD    | 0.43     | 0.18     | 1.0      | 7        | 3        | 2.8   | 0.25  | 163   |
| mg/kg/dose  | N     | 2        | 2        | 2        | 2        | 2        | 2     | 2     | 2     |
| 2           | Mean  | 3.66     | 0.55     | 4.4      | 149      | 103      | 31.3  | 1.41  | 857   |
| 5           | SD    | 0.62     | 0.04     | 0.2      | 4        | 0        | 0.4   | 0.02  | 824   |
| mg/kg/dose  | N     | 2        | 2        | 2        | 2        | 2        | 2     | 2     | 2     |
|             | %Diff | -12.66   | 0.92     | -19.4    | -1       | -3       | -4.6  | -2.49 | 122   |
| 3           | Mean  | 3.39     | 0.37     | 5.1      | 148      | 107      | 31.7  | 1.37  | 253   |
| 25          | SD    | 1.69     | 0.00     | 0.6      | 1        | 1        | 3.3   | 0.15  | 7     |
| mg/kg/dose  | N     | 2        | 2        | 2        | 2        | 2        | 2     | 2     | 2     |
|             | %Diff | -19.12   | -32.11   | -5.6     | -2       | 0        | -3.4  | -5.56 | -34   |
| 4           | Mean  | 3.80     | 0.68     | 4.4      | 147      | 105      | 28.6  | 1.51  | 320   |
| 100         | SD    | 0.24     | 0.03     | 0.4      | 1        | 1        | 2.1   | 0.06  | 97    |
| mg/kg/dose  | N     | 2        | 2        | 2        | 2        | 2        | 2     | 2     | 2     |
|             | %Diff | -9.20    | 24.77    | -18.5    | -2       | -1       | -12.8 | 4.35  | -17   |

Table 7 Summary of Chemistry-Recovery Phase (Cont'd)

Day: 210 Relative to Start Date

| Sex: Male |            | ALT   | AST   | TP    | ALB   | TBIL           | ALP   | GGT   | sGLU     | UREA     | CRE            | Ca       | P        |
|-----------|------------|-------|-------|-------|-------|----------------|-------|-------|----------|----------|----------------|----------|----------|
|           |            | (U/L) | (U/L) | (g/L) | (g/L) | ( $\mu$ mol/L) | (U/L) | (U/L) | (mmol/L) | (mmol/L) | ( $\mu$ mol/L) | (mmol/L) | (mmol/L) |
| 1         | Mean       | 45    | 51    | 70.7  | 42.7  | 3.84           | 788   | 87    | 3.53     | 6.90     | 55             | 2.49     | 2.15     |
|           | SD         | 10    | 2     | 2.5   | 0.4   | 2.03           | 237   | 18    | 0.74     | 0.11     | 5              | 0.04     | 0.33     |
|           | N          | 2     | 2     | 2     | 2     | 2              | 2     | 2     | 2        | 2        | 2              | 2        | 2        |
| 0         | mg/kg/dose |       |       |       |       |                |       |       |          |          |                |          |          |
|           | Mean       | 52    | 72    | 69.7  | 42.8  | 6.24           | 909   | 65    | 3.65     | 6.79     | 59             | 2.52     | 2.30     |
|           | SD         | 8     | 41    | 5.6   | 0.4   | 0.96           | 325   | 10    | 0.35     | 0.08     | 16             | 0.09     | 0.33     |
|           | N          | 2     | 2     | 2     | 2     | 2              | 2     | 2     | 2        | 2        | 2              | 2        | 2        |
| 2         | %Diff      | 14    | 43    | -1.4  | 0.2   | 62.71          | 15    | -25   | 3.55     | -1.67    | 7              | 1.00     | 7.23     |
|           | Mean       | 47    | 34    | 74.5  | 45.4  | 4.01           | 772   | 71    | 3.51     | 6.62     | 68             | 2.52     | 2.31     |
|           | SD         | 17    | 7     | 5.3   | 4.9   | 0.13           | 7     | 17    | 1.17     | 0.44     | 11             | 0.05     | 0.01     |
| 3         | mg/kg/dose |       |       |       |       |                |       |       |          |          |                |          |          |
|           | N          | 2     | 2     | 2     | 2     | 2              | 2     | 2     | 2        | 2        | 2              | 2        | 2        |
|           | %Diff      | 4     | -33   | 5.4   | 6.2   | 4.56           | -2    | -18   | -0.43    | -4.06    | 25             | 1.00     | 7.69     |
| 4         | Mean       | 56    | 50    | 76.6  | 46.0  | 6.55           | 911   | 79    | 3.27     | 7.75     | 56             | 2.46     | 2.14     |
|           | SD         | 4     | 5     | 6.6   | 1.8   | 0.50           | 336   | 1     | 0.42     | 0.97     | 10             | 0.08     | 0.39     |
|           | N          | 2     | 2     | 2     | 2     | 2              | 2     | 2     | 2        | 2        | 2              | 2        | 2        |
| 100       | mg/kg/dose |       |       |       |       |                |       |       |          |          |                |          |          |
|           | %Diff      | 23    | -2    | 8.4   | 7.7   | 70.66          | 16    | -9    | -7.23    | 12.25    | 3              | -1.20    | -0.47    |

Table 7 Summary of Chemistry-Recovery Phase (Cont'd)

Day: 210 Relative to Start Date

| Sex: Male  |       | TCHO     | TG       | K        | Na       | Cl       | GLB   | A/G   | CK    |
|------------|-------|----------|----------|----------|----------|----------|-------|-------|-------|
|            |       | (mmol/L) | (mmol/L) | (mmol/L) | (mmol/L) | (mmol/L) | (g/L) |       | (U/L) |
| 1          | Mean  | 2.89     | 0.25     | 4.5      | 149      | 107      | 28.0  | 1.53  | 1189  |
| 0          | SD    | 0.26     | 0.07     | 0.1      | 3        | 1        | 2.1   | 0.10  | 469   |
| mg/kg/dose | N     | 2        | 2        | 2        | 2        | 2        | 2     | 2     | 2     |
| 2          | Mean  | 3.48     | 0.63     | 4.6      | 147      | 104      | 26.9  | 1.62  | 2535  |
| 5          | SD    | 0.37     | 0.02     | 0.2      | 1        | 1        | 5.2   | 0.30  | 3260  |
| mg/kg/dose | N     | 2        | 2        | 2        | 2        | 2        | 2     | 2     | 2     |
|            | %Diff | 20.45    | 150.00   | 2.2      | -1       | -2       | -3.9  | 5.96  | 113   |
| 3          | Mean  | 3.67     | 0.48     | 5.2      | 147      | 105      | 29.1  | 1.56  | 627   |
| 25         | SD    | 0.89     | 0.08     | 0.7      | 1        | 1        | 0.4   | 0.14  | 648   |
| mg/kg/dose | N     | 2        | 2        | 2        | 2        | 2        | 2     | 2     | 2     |
|            | %Diff | 27.21    | 90.00    | 16.9     | -1       | -2       | 4.1   | 1.70  | -47   |
| 4          | Mean  | 3.45     | 0.62     | 4.6      | 145      | 102      | 30.6  | 1.52  | 513   |
| 100        | SD    | 0.49     | 0.18     | 0.3      | 1        | 1        | 4.8   | 0.18  | 180   |
| mg/kg/dose | N     | 2        | 2        | 2        | 2        | 2        | 2     | 2     | 2     |
|            | %Diff | 19.41    | 146.00   | 3.4      | -3       | -4       | 9.5   | -0.92 | -57   |

**Table 8      Summary of Urinalysis**

Table 8 Summary of Urinalysis

Key Page

**Measurement Descriptions**

Headings Used

pH  
SG  
Volume

Description

Urine pH  
Urine Specific Gravity  
Volume



Table 8 Summary of Urinalysis-Pretest and Dosing Phase

Day(s) Relative to Start Date

| Sex: Male |       | pH   | pH   | pH   | pH   | pH   | SG     | SG     | SG     | SG     | SG     | Volume<br>(mL)<br>[a] | Volume<br>(mL)<br>[a] |
|-----------|-------|------|------|------|------|------|--------|--------|--------|--------|--------|-----------------------|-----------------------|
|           |       | -11  | 53   | 87   | 123  | 179  | -11    | 53     | 87     | 123    | 179    | -11                   | 53                    |
| 1         | Mean  | 6.2  | 7.2  | 7.1  | 6.8  | 6.9  | 1.013  | 1.014  | 1.015  | 1.012  | 1.015  | 19                    | 17                    |
| 0         | SD    | 1.3  | 0.9  | 0.6  | 1.3  | 0.6  | 0.007  | 0.003  | 0.005  | 0.005  | 0.003  | 5                     | 6                     |
|           | N     | 6    | 6    | 6    | 6    | 6    | 6      | 6      | 6      | 6      | 6      | 6                     | 6                     |
| 2         | Mean  | 6.5  | 7.6  | 7.3  | 6.8  | 7.1  | 1.018  | 1.021  | 1.019  | 1.015  | 1.016  | 14                    | 17                    |
| 5         | SD    | 0.8  | 0.6  | 0.5  | 0.9  | 0.7  | 0.010  | 0.004  | 0.007  | 0.005  | 0.009  | 7                     | 8                     |
|           | N     | 6    | 6    | 6    | 6    | 6    | 6      | 6      | 6      | 6      | 6      | 6                     | 6                     |
|           | %Diff | 5.4  | 5.8  | 3.5  | 0.0  | 2.4  | 0.510  | 0.674  | 0.427  | 0.280  | 0.016  | -26                   | -3                    |
| 3         | Mean  | 5.8  | 7.0  | 6.6  | 7.2  | 7.0  | 1.019  | 1.015  | 1.016  | 1.013  | 1.012  | 16                    | 19                    |
| 25        | SD    | 1.0  | 0.4  | 0.9  | 0.9  | 0.8  | 0.008  | 0.008  | 0.009  | 0.006  | 0.007  | 6                     | 6                     |
|           | N     | 6    | 6    | 6    | 6    | 6    | 6      | 6      | 6      | 6      | 6      | 6                     | 6                     |
|           | %Diff | -6.8 | -2.3 | -7.1 | 6.2  | 1.2  | 0.592  | 0.132  | 0.148  | 0.033  | -0.312 | -17                   | 7                     |
| 4         | Mean  | 5.9  | 6.8  | 7.0  | 6.7  | 6.3  | 1.012  | 1.008  | 1.009  | 1.012  | 1.011  | 21                    | 18                    |
| 100       | SD    | 0.9  | 0.4  | 0.9  | 0.7  | 0.6  | 0.009  | 0.006  | 0.007  | 0.005  | 0.007  | 10                    | 11                    |
|           | N     | 6    | 6    | 6    | 6    | 6    | 6      | 6      | 6      | 6      | 6      | 6                     | 6                     |
|           | %Diff | -4.1 | -4.7 | -1.2 | -1.2 | -8.4 | -0.082 | -0.559 | -0.608 | -0.033 | -0.443 | 9                     | 5                     |

[a] - Anova & Dunnett

Table 8 Summary of Urinalysis-Pretest and Dosing Phase (Cont'd)

Day(s) Relative to Start Date

| Sex: Male  |       | Volume | Volume | Volume |
|------------|-------|--------|--------|--------|
|            |       | (mL)   | (mL)   | (mL)   |
|            |       | [a]    | [a]    | [a]    |
|            |       | 87     | 123    | 179    |
| 1          | Mean  | 24     | 18     | 19     |
| 0          | SD    | 9      | 3      | 8      |
| mg/kg/dose | N     | 6      | 6      | 6      |
| 2          | Mean  | 19     | 13     | 18     |
| 5          | SD    | 3      | 6      | 7      |
| mg/kg/dose | N     | 6      | 6      | 6      |
|            | %Diff | -19    | -29    | -5     |
| 3          | Mean  | 20     | 13     | 16     |
| 25         | SD    | 10     | 5      | 5      |
| mg/kg/dose | N     | 6      | 6      | 6      |
|            | %Diff | -15    | -29    | -19    |
| 4          | Mean  | 28     | 17     | 16     |
| 100        | SD    | 12     | 7      | 7      |
| mg/kg/dose | N     | 6      | 6      | 6      |
|            | %Diff | 18     | -6     | -20    |

[a] - Anova &amp; Dunnett

Table 8 Summary of Urinalysis-Pretest and Dosing Phase (Cont'd)

Day(s) Relative to Start Date

| Sex: Female |       | pH   | pH   | pH   | pH   | pH   | SG    | SG    | SG     | SG     | SG     | Volume<br>(mL)<br>[a] | Volume<br>(mL)<br>[a1] |
|-------------|-------|------|------|------|------|------|-------|-------|--------|--------|--------|-----------------------|------------------------|
|             |       | -12  | 52   | 86   | 122  | 178  | -12   | 52    | 86     | 122    | 178    | -12                   | 52                     |
| 1           | Mean  | 7.0  | 7.3  | 7.1  | 7.1  | 6.8  | 1.015 | 1.012 | 1.020  | 1.013  | 1.011  | 19                    | 22                     |
| 0           | SD    | 0.7  | 0.6  | 1.0  | 0.7  | 1.0  | 0.008 | 0.004 | 0.006  | 0.006  | 0.005  | 12                    | 5                      |
|             | N     | 6    | 6    | 6    | 6    | 6    | 6     | 6     | 6      | 6      | 6      | 6                     | 6                      |
| 2           | Mean  | 7.2  | 7.5  | 7.4  | 6.7  | 7.0  | 1.015 | 1.013 | 1.021  | 1.014  | 1.015  | 18                    | 19                     |
| 5           | SD    | 0.7  | 0.6  | 0.7  | 0.4  | 0.8  | 0.007 | 0.008 | 0.006  | 0.006  | 0.004  | 6                     | 11                     |
|             | N     | 6    | 6    | 6    | 6    | 6    | 6     | 6     | 6      | 6      | 6      | 6                     | 6                      |
|             | %Diff | 2.4  | 2.3  | 4.7  | -5.9 | 3.7  | 0.033 | 0.082 | 0.131  | 0.033  | 0.379  | -5                    | -15                    |
| 3           | Mean  | 6.9  | 7.1  | 6.8  | 6.9  | 6.9  | 1.018 | 1.014 | 1.016  | 1.013  | 1.015  | 24                    | 18                     |
| 25          | SD    | 0.9  | 0.7  | 1.0  | 1.1  | 1.1  | 0.008 | 0.008 | 0.007  | 0.005  | 0.003  | 14                    | 2                      |
|             | N     | 6    | 6    | 6    | 6    | 6    | 6     | 6     | 6      | 6      | 6      | 6                     | 6                      |
|             | %Diff | -1.2 | -3.4 | -3.5 | -2.4 | 2.5  | 0.263 | 0.132 | -0.343 | -0.066 | 0.379  | 25                    | -17                    |
| 4           | Mean  | 7.4  | 7.4  | 7.0  | 6.8  | 6.7  | 1.016 | 1.017 | 1.016  | 1.018  | 1.010  | 20                    | 16                     |
| 100         | SD    | 0.4  | 0.6  | 1.1  | 0.9  | 0.9  | 0.010 | 0.008 | 0.008  | 0.010  | 0.007  | 5                     | 6                      |
|             | N     | 6    | 6    | 6    | 6    | 6    | 6     | 6     | 6      | 6      | 6      | 6                     | 6                      |
|             | %Diff | 6.0  | 1.1  | -1.2 | -4.7 | -1.2 | 0.115 | 0.428 | -0.409 | 0.461  | -0.082 | 5                     | -26                    |

[a] - Anova &amp; Dunnett

[a1] - Kruskal-Wallis &amp; Dunnett on Ranks

Table 8 Summary of Urinalysis-Pretest and Dosing Phase (Cont'd)

Day(s) Relative to Start Date

| Sex: Female |       | Volume | Volume | Volume |
|-------------|-------|--------|--------|--------|
|             |       | (mL)   | (mL)   | (mL)   |
|             |       | [a]    | [a]    | [a1]   |
|             |       | 86     | 122    | 178    |
| 1           | Mean  | 22     | 18     | 22     |
| 0           | SD    | 2      | 5      | 11     |
| mg/kg/dose  | N     | 6      | 6      | 6      |
| 2           | Mean  | 18     | 15     | 17     |
| 5           | SD    | 4      | 6      | 5      |
| mg/kg/dose  | N     | 6      | 6      | 6      |
|             | %Diff | -16    | -16    | -23    |
| 3           | Mean  | 20     | 16     | 20     |
| 25          | SD    | 3      | 3      | 3      |
| mg/kg/dose  | N     | 6      | 6      | 6      |
|             | %Diff | -9     | -13    | -11    |
| 4           | Mean  | 17     | 13     | 13     |
| 100         | SD    | 6      | 8      | 5      |
| mg/kg/dose  | N     | 6      | 6      | 6      |
|             | %Diff | -19    | -28    | -42    |

[a] - Kruskal-Wallis &amp; Dunnett on Ranks

[a1] - Anova &amp; Dunnett

Table 8 Summary of Urinalysis-Recovery Phase

Day: 209 Relative to Start Date

| Sex: Female |       | pH   | SG     | Volume<br>(mL) |
|-------------|-------|------|--------|----------------|
| 1           | Mean  | 7.3  | 1.017  | 30             |
| 0           | SD    | 0.4  | 0.013  | 11             |
| mg/kg/dose  | N     | 2    | 2      | 2              |
| 2           | Mean  | 7.8  | 1.018  | 40             |
| 5           | SD    | 0.4  | 0.004  | 1              |
| mg/kg/dose  | N     | 2    | 2      | 2              |
|             | %Diff | 6.9  | 0.098  | 36             |
| 3           | Mean  | 7.3  | 1.010  | 44             |
| 25          | SD    | 0.4  | 0.014  | 12             |
| mg/kg/dose  | N     | 2    | 2      | 2              |
|             | %Diff | 0.0  | -0.639 | 47             |
| 4           | Mean  | 7.0  | 1.012  | 55             |
| 100         | SD    | 0.0  | 0.014  | 41             |
| mg/kg/dose  | N     | 2    | 2      | 2              |
|             | %Diff | -3.4 | -0.443 | 86             |

Table 8 Summary of Urinalysis-Recovery Phase (Cont'd)

Day: 210 Relative to Start Date

| Sex: Male  |       | pH    | SG     | Volume<br>(mL) |
|------------|-------|-------|--------|----------------|
| 1          | Mean  | 7.8   | 1.014  | 50             |
| 0          | SD    | 0.4   | 0.005  | 23             |
| mg/kg/dose | N     | 2     | 2      | 2              |
| 2          | Mean  | 7.5   | 1.018  | 37             |
| 5          | SD    | 1.4   | 0.008  | 5              |
| mg/kg/dose | N     | 2     | 2      | 2              |
|            | %Diff | -3.2  | 0.444  | -27            |
| 3          | Mean  | 6.8   | 1.018  | 12             |
| 25         | SD    | 1.8   | 0.004  | 11             |
| mg/kg/dose | N     | 2     | 2      | 2              |
|            | %Diff | -12.9 | 0.444  | -76            |
| 4          | Mean  | 6.5   | 1.009  | 43             |
| 100        | SD    | 0.7   | 0.011  | 41             |
| mg/kg/dose | N     | 2     | 2      | 2              |
|            | %Diff | -16.1 | -0.444 | -14            |

**Table 9      Summary of Immunoglobulin and Complement**

Table 9 Summary of Immunoglobulin and Complement

Key Page

**Measurement Descriptions**

| <u>Headings Used</u> | <u>Description</u> |
|----------------------|--------------------|
| C3c                  | Complement C3c     |
| C4                   | Complement C4      |
| IgG                  | Immunoglobulin G   |
| IgA                  | Immunoglobulin A   |
| IgM                  | Immunoglobulin M   |



Table 9 Summary of Immunoglobulin and Complement-Pretest and Dosing Phase

Day(s) Relative to Start Date

| Sex: Male  |       | C3c   | C3c   | C3c   | C3c    | C4    | C4    | C4    | C4     | IgG    | IgG    | IgG      | IgG      |
|------------|-------|-------|-------|-------|--------|-------|-------|-------|--------|--------|--------|----------|----------|
|            |       | (g/L) | (g/L) | (g/L) | (g/L)  | (g/L) | (g/L) | (g/L) | (g/L)  | (g/L)  | (g/L)  | (g/L)    | (g/L)    |
|            |       | [a]   | [a]   | [a]   | [a]    | [a]   | [a]   | [a]   | [a1]   | [a]    | [a]    | [a]      | [a]      |
|            |       | -6    | 1     | 88    | 178    | -6    | 1     | 88    | 178    | -6     | 1      | 88       | 178      |
| 1          | Mean  | 1.32  | 1.21  | 1.17  | 1.06   | 0.18  | 0.18  | 0.18  | 0.18   | 9.69   | 9.28   | 8.31     | 9.57     |
| 0          | SD    | 0.20  | 0.11  | 0.09  | 0.11   | 0.04  | 0.05  | 0.03  | 0.06   | 1.08   | 0.93   | 1.07     | 1.29     |
| mg/kg/dose | N     | 6     | 6     | 6     | 6      | 6     | 6     | 6     | 6      | 6      | 6      | 6        | 6        |
| 2          | Mean  | 1.23  | 1.17  | 1.16  | 0.97   | 0.17  | 0.16  | 0.20  | 0.16   | 8.90   | 8.07   | 8.23     | 9.14     |
| 5          | SD    | 0.24  | 0.15  | 0.17  | 0.11   | 0.07  | 0.07  | 0.09  | 0.06   | 1.29   | 1.57   | 1.32     | 1.11     |
| mg/kg/dose | N     | 6     | 6     | 6     | 6      | 6     | 6     | 6     | 6      | 6      | 6      | 6        | 6        |
|            | %Diff | -6.70 | -3.57 | -1.28 | -8.68  | -8.33 | -9.43 | 10.38 | -7.55  | -8.07  | -13.06 | -0.98    | -4.56    |
| 3          | Mean  | 1.23  | 1.10  | 1.07  | 1.01   | 0.20  | 0.19  | 0.21  | 0.19   | 8.29   | 8.20   | 8.33     | 9.57     |
| 25         | SD    | 0.16  | 0.09  | 0.10  | 0.11   | 0.08  | 0.07  | 0.10  | 0.09   | 1.35   | 1.20   | 0.88     | 0.91     |
| mg/kg/dose | N     | 6     | 6     | 6     | 6      | 6     | 6     | 6     | 6      | 6      | 6      | 6        | 6        |
|            | %Diff | -7.08 | -9.48 | -8.53 | -4.73  | 12.96 | 4.72  | 17.92 | 5.66   | -14.40 | -11.66 | 0.20     | 0.00     |
| 4          | Mean  | 1.38  | 1.21  | 1.10  | 0.94   | 0.22  | 0.20  | 0.19  | 0.15   | 9.76   | 11.10  | 12.43*** | 13.13*** |
| 100        | SD    | 0.26  | 0.15  | 0.08  | 0.08   | 0.06  | 0.06  | 0.06  | 0.04   | 1.50   | 1.64   | 1.53     | 1.50     |
| mg/kg/dose | N     | 6     | 6     | 6     | 6      | 6     | 6     | 6     | 6      | 6      | 6      | 6        | 6        |
|            | %Diff | 4.55  | 0.00  | -6.40 | -11.04 | 19.44 | 12.26 | 5.66  | -13.21 | 0.77   | 19.61  | 49.46    | 37.19    |

[a] - Anova & Dunnett: \*\*\* =  $p \leq 0.001$ 

[a1] - Kruskal-Wallis &amp; Dunnett on Ranks

Table 9 Summary of Immunoglobulin and Complement-Pretest and Dosing Phase (Cont'd)

Day(s) Relative to Start Date

| Sex: Male  |       | IgA    | IgA    | IgA    | IgA    | IgM   | IgM   | IgM   | IgM   |
|------------|-------|--------|--------|--------|--------|-------|-------|-------|-------|
|            |       | (g/L)  | (g/L)  | (g/L)  | (g/L)  | (g/L) | (g/L) | (g/L) | (g/L) |
|            |       | [a]    | [a]    | [a]    | [a]    | [a]   | [a]   | [a]   | [a]   |
|            |       | -6     | 1      | 88     | 178    | -6    | 1     | 88    | 178   |
| 1          | Mean  | 2.11   | 1.94   | 1.72   | 1.72   | 1.00  | 0.86  | 0.72  | 0.71  |
| 0          | SD    | 0.79   | 0.77   | 0.58   | 0.57   | 0.41  | 0.32  | 0.31  | 0.34  |
| mg/kg/dose | N     | 6      | 6      | 6      | 6      | 6     | 6     | 6     | 6     |
| 2          | Mean  | 1.45   | 1.30   | 1.43   | 1.52   | 0.94  | 0.82  | 0.69  | 0.66  |
| 5          | SD    | 0.60   | 0.54   | 0.57   | 0.58   | 0.49  | 0.37  | 0.33  | 0.31  |
| mg/kg/dose | N     | 6      | 6      | 6      | 6      | 6     | 6     | 6     | 6     |
|            | %Diff | -31.39 | -32.73 | -17.04 | -11.53 | -5.19 | -4.45 | -3.93 | -6.60 |
| 3          | Mean  | 1.66   | 1.49   | 1.46   | 1.57   | 1.07  | 1.00  | 0.94  | 0.83  |
| 25         | SD    | 0.52   | 0.52   | 0.49   | 0.31   | 0.62  | 0.61  | 0.61  | 0.50  |
| mg/kg/dose | N     | 6      | 6      | 6      | 6      | 6     | 6     | 6     | 6     |
|            | %Diff | -21.69 | -23.17 | -15.49 | -8.82  | 7.20  | 15.47 | 29.56 | 16.98 |
| 4          | Mean  | 1.97   | 1.77   | 1.75   | 1.60   | 0.92  | 0.83  | 0.77  | 0.70  |
| 100        | SD    | 0.63   | 0.56   | 0.55   | 0.45   | 0.14  | 0.20  | 0.26  | 0.20  |
| mg/kg/dose | N     | 6      | 6      | 6      | 6      | 6     | 6     | 6     | 6     |
|            | %Diff | -8.86  | -8.79  | 1.65   | -6.88  | -8.04 | -3.48 | 7.16  | -1.65 |

[a] - Anova &amp; Dunnett

Table 9 Summary of Immunoglobulin and Complement-Pretest and Dosing Phase (Cont'd)

Day(s) Relative to Start Date

| Sex: Female |       | C3c   | C3c    | C3c    | C3c   | C4    | C4    | C4    | C4    | IgG    | IgG   | IgG   | IgG   |
|-------------|-------|-------|--------|--------|-------|-------|-------|-------|-------|--------|-------|-------|-------|
|             |       | (g/L) | (g/L)  | (g/L)  | (g/L) | (g/L) | (g/L) | (g/L) | (g/L) | (g/L)  | (g/L) | (g/L) | (g/L) |
|             |       | [a]   | [a]    | [a1]   | [a]   | [a]   | [a]   | [a]   | [a]   | [a]    | [a]   | [a]   | [a]   |
|             |       | -7    | 1      | 87     | 177   | -7    | 1     | 87    | 177   | -7     | 1     | 87    | 177   |
| 1           | Mean  | 1.24  | 1.21   | 1.11   | 0.98  | 0.20  | 0.20  | 0.19  | 0.15  | 10.66  | 9.72  | 9.62  | 11.54 |
| 0           | SD    | 0.15  | 0.18   | 0.17   | 0.20  | 0.04  | 0.07  | 0.04  | 0.03  | 2.67   | 3.55  | 2.68  | 3.68  |
| mg/kg/dose  | N     | 6     | 6      | 6      | 6     | 6     | 6     | 6     | 6     | 6      | 6     | 6     | 6     |
| 2           | Mean  | 1.30  | 1.20   | 1.06   | 0.96  | 0.20  | 0.20  | 0.19  | 0.17  | 12.47  | 12.45 | 11.19 | 13.44 |
| 5           | SD    | 0.20  | 0.11   | 0.06   | 0.13  | 0.05  | 0.05  | 0.03  | 0.07  | 1.41   | 2.14  | 1.29  | 1.73  |
| mg/kg/dose  | N     | 6     | 6      | 6      | 6     | 6     | 6     | 6     | 6     | 6      | 6     | 6     | 6     |
|             | %Diff | 4.70  | -0.69  | -4.07  | -2.04 | -0.84 | -3.31 | -1.75 | 12.22 | 16.91  | 27.99 | 16.25 | 16.45 |
| 3           | Mean  | 1.18  | 1.06   | 1.01   | 0.95  | 0.20  | 0.19  | 0.20  | 0.19  | 10.63  | 10.39 | 9.97  | 12.36 |
| 25          | SD    | 0.21  | 0.14   | 0.05   | 0.14  | 0.05  | 0.08  | 0.05  | 0.04  | 1.63   | 1.64  | 1.45  | 1.27  |
| mg/kg/dose  | N     | 6     | 6      | 6      | 6     | 6     | 6     | 6     | 6     | 6      | 6     | 6     | 6     |
|             | %Diff | -5.11 | -12.28 | -8.45  | -2.90 | 0.84  | -4.96 | 5.26  | 27.78 | -0.31  | 6.89  | 3.64  | 7.11  |
| 4           | Mean  | 1.20  | 1.08   | 0.99   | 0.89  | 0.24  | 0.22  | 0.19  | 0.17  | 8.82   | 10.18 | 10.59 | 12.88 |
| 100         | SD    | 0.09  | 0.09   | 0.06   | 0.09  | 0.06  | 0.06  | 0.03  | 0.05  | 1.80   | 1.52  | 1.24  | 2.07  |
| mg/kg/dose  | N     | 6     | 6      | 6      | 6     | 6     | 6     | 6     | 6     | 6      | 6     | 6     | 6     |
|             | %Diff | -3.63 | -10.90 | -10.86 | -8.86 | 20.17 | 9.92  | -0.88 | 13.33 | -17.24 | 4.66  | 10.08 | 11.61 |

[a] - Anova & Dunnett

[a1] - Kruskal-Wallis & Dunnett on Ranks

Table 9 Summary of Immunoglobulin and Complement-Pretest and Dosing Phase (Cont'd)

Day(s) Relative to Start Date

| Sex: Female |       | IgA   | IgA   | IgA   | IgA   | IgM    | IgM    | IgM   | IgM    |
|-------------|-------|-------|-------|-------|-------|--------|--------|-------|--------|
|             |       | (g/L) | (g/L) | (g/L) | (g/L) | (g/L)  | (g/L)  | (g/L) | (g/L)  |
|             |       | [a]   | [a]   | [a]   | [a]   | [a]    | [a]    | [a]   | [a]    |
|             |       | -7    | 1     | 87    | 177   | -7     | 1      | 87    | 177    |
| 1           | Mean  | 1.41  | 1.30  | 1.49  | 1.48  | 1.27   | 1.15   | 1.01  | 1.06   |
| 0           | SD    | 0.62  | 0.55  | 0.57  | 0.53  | 0.54   | 0.47   | 0.42  | 0.40   |
| mg/kg/dose  | N     | 6     | 6     | 6     | 6     | 6      | 6      | 6     | 6      |
| 2           | Mean  | 1.51  | 1.50  | 1.60  | 1.53  | 1.19   | 1.08   | 0.92  | 0.98   |
| 5           | SD    | 0.62  | 0.57  | 0.63  | 0.72  | 0.58   | 0.58   | 0.41  | 0.35   |
| mg/kg/dose  | N     | 6     | 6     | 6     | 6     | 6      | 6      | 6     | 6      |
|             | %Diff | 6.73  | 15.55 | 7.25  | 3.73  | -6.41  | -5.68  | -8.62 | -7.40  |
| 3           | Mean  | 1.78  | 1.62  | 1.88  | 1.83  | 1.30   | 1.09   | 1.08  | 1.14   |
| 25          | SD    | 0.62  | 0.53  | 1.04  | 0.92  | 0.39   | 0.33   | 0.35  | 0.34   |
| mg/kg/dose  | N     | 6     | 6     | 6     | 6     | 6      | 6      | 6     | 6      |
|             | %Diff | 26.21 | 24.55 | 26.00 | 24.07 | 2.09   | -5.24  | 6.97  | 7.40   |
| 4           | Mean  | 1.46  | 1.40  | 1.47  | 1.36  | 1.02   | 0.88   | 0.91  | 0.88   |
| 100         | SD    | 0.65  | 0.66  | 0.52  | 0.40  | 0.39   | 0.31   | 0.44  | 0.46   |
| mg/kg/dose  | N     | 6     | 6     | 6     | 6     | 6      | 6      | 6     | 6      |
|             | %Diff | 3.54  | 7.97  | -1.56 | -8.14 | -19.76 | -23.14 | -9.12 | -19.21 |

[a] - Anova &amp; Dunnett

Table 9 Summary of Immunoglobulin and Complement-Recovery Phase

Day: 210 Relative to Start Date

| Sex: Female |       | C3c    | C4    | IgG    | IgA    | IgM   |
|-------------|-------|--------|-------|--------|--------|-------|
|             |       | (g/L)  | (g/L) | (g/L)  | (g/L)  | (g/L) |
| 1           | Mean  | 0.96   | 0.12  | 12.60  | 1.34   | 0.92  |
| 0           | SD    | 0.12   | 0.01  | 3.85   | 0.54   | 0.43  |
| mg/kg/dose  | N     | 2      | 2     | 2      | 2      | 2     |
| 2           | Mean  | 0.88   | 0.17  | 14.13  | 1.14   | 0.83  |
| 5           | SD    | 0.04   | 0.04  | 0.58   | 0.84   | 0.06  |
| mg/kg/dose  | N     | 2      | 2     | 2      | 2      | 2     |
|             | %Diff | -7.85  | 41.67 | 12.14  | -14.98 | -9.84 |
| 3           | Mean  | 0.86   | 0.13  | 11.44  | 2.29   | 1.38  |
| 25          | SD    | 0.13   | 0.00  | 1.97   | 1.20   | 0.14  |
| mg/kg/dose  | N     | 2      | 2     | 2      | 2      | 2     |
|             | %Diff | -9.95  | 8.33  | -8.21  | 71.16  | 50.82 |
| 4           | Mean  | 0.83   | 0.17  | 9.03   | 1.50   | 1.09  |
| 100         | SD    | 0.01   | 0.02  | 0.06   | 0.08   | 0.59  |
| mg/kg/dose  | N     | 2      | 2     | 2      | 2      | 2     |
|             | %Diff | -13.61 | 37.50 | -28.37 | 11.99  | 19.13 |

Table 9 Summary of Immunoglobulin and Complement-Recovery Phase (Cont'd)

Day: 211 Relative to Start Date

| Sex: Male  |       | C3c    | C4     | IgG   | IgA    | IgM    |
|------------|-------|--------|--------|-------|--------|--------|
|            |       | (g/L)  | (g/L)  | (g/L) | (g/L)  | (g/L)  |
| 1          | Mean  | 0.99   | 0.16   | 9.06  | 1.69   | 0.85   |
| 0          | SD    | 0.06   | 0.08   | 1.95  | 0.93   | 0.40   |
| mg/kg/dose | N     | 2      | 2      | 2     | 2      | 2      |
| 2          | Mean  | 0.85   | 0.13   | 9.65  | 1.22   | 0.47   |
| 5          | SD    | 0.05   | 0.05   | 2.29  | 0.69   | 0.35   |
| mg/kg/dose | N     | 2      | 2      | 2     | 2      | 2      |
|            | %Diff | -14.21 | -21.88 | 6.51  | -28.11 | -45.29 |
| 3          | Mean  | 0.95   | 0.25   | 8.88  | 1.38   | 0.64   |
| 25         | SD    | 0.11   | 0.03   | 0.56  | 0.10   | 0.32   |
| mg/kg/dose | N     | 2      | 2      | 2     | 2      | 2      |
|            | %Diff | -4.06  | 56.25  | -2.04 | -18.34 | -25.29 |
| 4          | Mean  | 0.90   | 0.14   | 10.42 | 1.77   | 0.53   |
| 100        | SD    | 0.01   | 0.04   | 1.80  | 0.39   | 0.16   |
| mg/kg/dose | N     | 2      | 2      | 2     | 2      | 2      |
|            | %Diff | -8.63  | -12.50 | 14.96 | 4.44   | -38.24 |

**Table 1 Summary of Immunophenotyping Results-Monkey Blood (CD45+CD3+, Total T Cells)**

| Animal No.  | Subpopulation percent (%) for T/B Panel (Male) |              |              |              |              |
|-------------|------------------------------------------------|--------------|--------------|--------------|--------------|
|             | Pretest                                        | Day 1 2~4h   | Day 88       | Day 178      | Day 211      |
| 1001        | 65.86                                          | 54.33        | 63.33        | 68.76        | NA           |
| 1002        | 62.88                                          | 56.50        | 64.79        | 66.92        | NA           |
| 1003        | 63.69                                          | 62.57        | 55.87        | 63.28        | NA           |
| 1004        | 63.57                                          | 59.57        | 66.70        | 74.52        | NA           |
| 1005        | 63.37                                          | 59.09        | 61.06        | 67.57        | 66.49        |
| 1006        | 34.54                                          | 29.52        | 45.37        | 54.71        | 57.69        |
| <b>Mean</b> | <b>58.99</b>                                   | <b>53.60</b> | <b>59.52</b> | <b>65.96</b> | <b>62.09</b> |
| <b>SD</b>   | <b>12.02</b>                                   | <b>12.12</b> | <b>7.87</b>  | <b>6.61</b>  | <b>6.22</b>  |
| 2001        | 53.42                                          | 52.01        | 65.20        | 73.68        | NA           |
| 2002        | 68.86                                          | 54.31        | 57.89        | 69.52        | NA           |
| 2003        | 56.25                                          | 55.54        | 61.83        | 71.19        | NA           |
| 2004        | 57.28                                          | 42.99        | 60.66        | 74.13        | NA           |
| 2005        | 59.04                                          | 53.47        | 60.48        | 71.69        | 70.00        |
| 2006        | 54.76                                          | 51.27        | 68.28        | 76.05        | 79.22        |
| <b>Mean</b> | <b>58.27</b>                                   | <b>51.60</b> | <b>62.39</b> | <b>72.71</b> | <b>74.61</b> |
| <b>SD</b>   | <b>5.54</b>                                    | <b>4.49</b>  | <b>3.74</b>  | <b>2.35</b>  | <b>6.52</b>  |
| 3001        | 60.71                                          | 55.96        | 56.68        | 66.83        | NA           |
| 3002        | 56.79                                          | 55.23        | 58.29        | 66.37        | NA           |
| 3003        | 71.53                                          | 65.61        | 72.66        | 74.19        | NA           |
| 3004        | 74.36                                          | 71.01        | 74.71        | 82.21        | NA           |
| 3005        | 55.79                                          | 48.15        | 52.26        | 55.75        | 58.11        |
| 3006        | 68.69                                          | 64.83        | 72.75        | 78.14        | 77.54        |
| <b>Mean</b> | <b>64.65</b>                                   | <b>60.13</b> | <b>64.56</b> | <b>70.58</b> | <b>67.83</b> |
| <b>SD</b>   | <b>7.92</b>                                    | <b>8.43</b>  | <b>9.88</b>  | <b>9.56</b>  | <b>13.74</b> |
| 4001        | 59.71                                          | 55.17        | 69.21        | 71.41        | NA           |
| 4002        | 70.61                                          | 64.81        | 64.92        | 68.34        | NA           |
| 4003        | 48.66                                          | 43.16        | 49.26        | 55.35        | NA           |
| 4004        | 61.84                                          | 50.29        | 67.47        | 75.62        | NA           |
| 4005        | 57.10                                          | 50.70        | 68.00        | 80.73        | 79.90        |
| 4006        | 60.83                                          | 57.38        | 72.62        | 79.00        | 72.86        |
| <b>Mean</b> | <b>59.79</b>                                   | <b>53.59</b> | <b>65.25</b> | <b>71.74</b> | <b>76.38</b> |
| <b>SD</b>   | <b>7.12</b>                                    | <b>7.36</b>  | <b>8.23</b>  | <b>9.26</b>  | <b>4.98</b>  |

**Table 2 Summary of Immunophenotyping Results-Monkey Blood  
(CD45+CD3+CD4+CD8-, Helper T Cells)**

| Animal No.  | Subpopulation percent (%) for T/B Panel (Male) |              |              |              |              |
|-------------|------------------------------------------------|--------------|--------------|--------------|--------------|
|             | Pretest                                        | Day 1 2~4h   | Day 88       | Day 178      | Day 211      |
| 1001        | 22.23                                          | 26.66        | 25.10        | 30.80        | NA           |
| 1002        | 42.81                                          | 37.48        | 43.48        | 43.90        | NA           |
| 1003        | 43.52                                          | 42.20        | 35.53        | 38.70        | NA           |
| 1004        | 34.51                                          | 33.25        | 36.85        | 41.26        | NA           |
| 1005        | 32.40                                          | 30.28        | 30.31        | 35.03        | 31.02        |
| 1006        | 20.80                                          | 18.35        | 28.84        | 35.53        | 37.71        |
| <b>Mean</b> | <b>32.71</b>                                   | <b>31.37</b> | <b>33.35</b> | <b>37.54</b> | <b>34.37</b> |
| <b>SD</b>   | <b>9.74</b>                                    | <b>8.38</b>  | <b>6.59</b>  | <b>4.72</b>  | <b>4.73</b>  |
| 2001        | 25.68                                          | 27.17        | 38.40        | 43.80        | NA           |
| 2002        | 43.02                                          | 32.03        | 31.96        | 41.47        | NA           |
| 2003        | 26.97                                          | 25.48        | 26.10        | 33.24        | NA           |
| 2004        | 32.55                                          | 24.46        | 33.87        | 44.37        | NA           |
| 2005        | 26.96                                          | 26.05        | 29.67        | 35.08        | 34.06        |
| 2006        | 34.64                                          | 33.73        | 37.76        | 39.75        | 43.32        |
| <b>Mean</b> | <b>31.64</b>                                   | <b>28.15</b> | <b>32.96</b> | <b>39.62</b> | <b>38.69</b> |
| <b>SD</b>   | <b>6.61</b>                                    | <b>3.80</b>  | <b>4.74</b>  | <b>4.58</b>  | <b>6.55</b>  |
| 3001        | 37.67                                          | 31.82        | 32.12        | 38.96        | NA           |
| 3002        | 34.60                                          | 32.36        | 33.12        | 39.73        | NA           |
| 3003        | 38.50                                          | 38.30        | 39.50        | 39.90        | NA           |
| 3004        | 41.68                                          | 41.25        | 40.68        | 47.08        | NA           |
| 3005        | 29.99                                          | 26.32        | 29.65        | 28.77        | 32.38        |
| 3006        | 42.52                                          | 39.27        | 43.82        | 47.90        | 46.90        |
| <b>Mean</b> | <b>37.49</b>                                   | <b>34.89</b> | <b>36.48</b> | <b>40.39</b> | <b>39.64</b> |
| <b>SD</b>   | <b>4.66</b>                                    | <b>5.67</b>  | <b>5.61</b>  | <b>6.91</b>  | <b>10.27</b> |
| 4001        | 29.70                                          | 30.26        | 36.32        | 33.20        | NA           |
| 4002        | 36.43                                          | 33.76        | 31.05        | 32.49        | NA           |
| 4003        | 19.57                                          | 18.44        | 21.68        | 21.91        | NA           |
| 4004        | 31.09                                          | 26.19        | 30.12        | 31.96        | NA           |
| 4005        | 32.84                                          | 28.17        | 42.42        | 55.07        | 54.86        |
| 4006        | 35.52                                          | 33.73        | 40.93        | 42.77        | 40.68        |
| <b>Mean</b> | <b>30.86</b>                                   | <b>28.43</b> | <b>33.75</b> | <b>36.23</b> | <b>47.77</b> |
| <b>SD</b>   | <b>6.09</b>                                    | <b>5.74</b>  | <b>7.74</b>  | <b>11.35</b> | <b>10.03</b> |



**Table 3 Summary of Immunophenotyping Results-Monkey Blood (CD45+CD3+CD4-CD8+, Cytotoxic T Cells)**

| Animal No.  | Subpopulation percent (%) for T/B Panel (Male) |              |              |              |              |
|-------------|------------------------------------------------|--------------|--------------|--------------|--------------|
|             | Pretest                                        | Day 1 2~4h   | Day 88       | Day 178      | Day 211      |
| 1001        | 39.95                                          | 23.50        | 33.66        | 33.56        | NA           |
| 1002        | 15.87                                          | 14.75        | 16.50        | 17.67        | NA           |
| 1003        | 16.16                                          | 16.93        | 15.79        | 20.52        | NA           |
| 1004        | 24.84                                          | 22.38        | 24.26        | 28.18        | NA           |
| 1005        | 26.82                                          | 25.18        | 26.35        | 27.75        | 30.94        |
| 1006        | 11.12                                          | 8.28         | 13.18        | 15.95        | 16.94        |
| <b>Mean</b> | <b>22.46</b>                                   | <b>18.50</b> | <b>21.62</b> | <b>23.94</b> | <b>23.94</b> |
| <b>SD</b>   | <b>10.41</b>                                   | <b>6.41</b>  | <b>7.82</b>  | <b>6.93</b>  | <b>9.90</b>  |
| 2001        | 23.28                                          | 20.52        | 22.71        | 26.56        | NA           |
| 2002        | 22.56                                          | 18.67        | 22.23        | 24.44        | NA           |
| 2003        | 25.58                                          | 26.55        | 29.39        | 31.51        | NA           |
| 2004        | 18.83                                          | 13.79        | 20.77        | 23.55        | NA           |
| 2005        | 27.51                                          | 23.69        | 26.32        | 32.90        | 32.52        |
| 2006        | 15.87                                          | 13.55        | 24.91        | 30.00        | 29.12        |
| <b>Mean</b> | <b>22.27</b>                                   | <b>19.46</b> | <b>24.39</b> | <b>28.16</b> | <b>30.82</b> |
| <b>SD</b>   | <b>4.30</b>                                    | <b>5.23</b>  | <b>3.15</b>  | <b>3.87</b>  | <b>2.40</b>  |
| 3001        | 18.56                                          | 19.21        | 19.38        | 22.55        | NA           |
| 3002        | 18.85                                          | 19.87        | 21.24        | 22.63        | NA           |
| 3003        | 29.23                                          | 23.72        | 29.40        | 30.75        | NA           |
| 3004        | 28.41                                          | 24.63        | 30.02        | 30.46        | NA           |
| 3005        | 20.91                                          | 17.36        | 18.67        | 22.32        | 22.03        |
| 3006        | 21.13                                          | 20.25        | 24.58        | 26.23        | 26.80        |
| <b>Mean</b> | <b>22.85</b>                                   | <b>20.84</b> | <b>23.88</b> | <b>25.82</b> | <b>24.42</b> |
| <b>SD</b>   | <b>4.75</b>                                    | <b>2.78</b>  | <b>4.96</b>  | <b>3.98</b>  | <b>3.37</b>  |
| 4001        | 25.34                                          | 20.43        | 29.07        | 33.98        | NA           |
| 4002        | 29.61                                          | 26.67        | 29.82        | 31.55        | NA           |
| 4003        | 25.45                                          | 20.39        | 22.77        | 27.86        | NA           |
| 4004        | 22.25                                          | 17.01        | 28.81        | 35.88        | NA           |
| 4005        | 19.81                                          | 16.88        | 20.68        | 20.98        | 21.02        |
| 4006        | 22.13                                          | 20.10        | 28.84        | 33.55        | 29.44        |
| <b>Mean</b> | <b>24.10</b>                                   | <b>20.25</b> | <b>26.67</b> | <b>30.63</b> | <b>25.23</b> |
| <b>SD</b>   | <b>3.45</b>                                    | <b>3.55</b>  | <b>3.90</b>  | <b>5.46</b>  | <b>5.95</b>  |

**Table 4 Summary of Immunophenotyping Results-Monkey Blood  
(CD45+CD3-CD20+, B Cells)**

| Animal No.  | Subpopulation percent (%) for T/B Panel (Male) |              |              |              |              |
|-------------|------------------------------------------------|--------------|--------------|--------------|--------------|
|             | Pretest                                        | Day 1 2~4h   | Day 88       | Day 178      | Day 211      |
| 1001        | 20.76                                          | 34.61        | 21.87        | 16.39        | NA           |
| 1002        | 22.23                                          | 29.73        | 24.97        | 21.66        | NA           |
| 1003        | 25.90                                          | 31.49        | 34.03        | 28.21        | NA           |
| 1004        | 31.24                                          | 33.25        | 23.10        | 18.92        | NA           |
| 1005        | 24.31                                          | 25.98        | 27.79        | 23.54        | 24.27        |
| 1006        | 38.72                                          | 55.28        | 26.57        | 21.43        | 26.85        |
| <b>Mean</b> | <b>27.19</b>                                   | <b>35.06</b> | <b>26.39</b> | <b>21.69</b> | <b>25.56</b> |
| <b>SD</b>   | <b>6.71</b>                                    | <b>10.35</b> | <b>4.33</b>  | <b>4.04</b>  | <b>1.82</b>  |
| 2001        | 30.14                                          | 37.06        | 27.19        | 17.61        | NA           |
| 2002        | 26.37                                          | 37.89        | 35.17        | 23.62        | NA           |
| 2003        | 32.27                                          | 32.92        | 17.44        | 15.69        | NA           |
| 2004        | 28.93                                          | 46.89        | 26.67        | 17.68        | NA           |
| 2005        | 35.15                                          | 41.54        | 33.96        | 24.19        | 25.37        |
| 2006        | 37.80                                          | 46.04        | 26.39        | 16.77        | 14.18        |
| <b>Mean</b> | <b>31.78</b>                                   | <b>40.39</b> | <b>27.80</b> | <b>19.26</b> | <b>19.78</b> |
| <b>SD</b>   | <b>4.19</b>                                    | <b>5.45</b>  | <b>6.38</b>  | <b>3.67</b>  | <b>7.91</b>  |
| 3001        | 26.64                                          | 30.38        | 31.92        | 21.30        | NA           |
| 3002        | 20.81                                          | 27.90        | 17.81        | 18.43        | NA           |
| 3003        | 19.41                                          | 30.20        | 19.34        | 19.09        | NA           |
| 3004        | 15.74                                          | 20.65        | 15.59        | 10.86        | NA           |
| 3005        | 22.38                                          | 33.28        | 32.31        | 21.69        | 25.74        |
| 3006        | 23.32                                          | 27.72        | 17.96        | 16.90        | 15.90        |
| <b>Mean</b> | <b>21.38</b>                                   | <b>28.36</b> | <b>22.49</b> | <b>18.05</b> | <b>20.82</b> |
| <b>SD</b>   | <b>3.70</b>                                    | <b>4.28</b>  | <b>7.55</b>  | <b>3.95</b>  | <b>6.96</b>  |
| 4001        | 31.17                                          | 39.83        | 21.15        | 16.25        | NA           |
| 4002        | 20.94                                          | 26.52        | 20.55        | 15.40        | NA           |
| 4003        | 45.76                                          | 50.18        | 47.34        | 41.93        | NA           |
| 4004        | 32.40                                          | 44.86        | 24.95        | 19.03        | NA           |
| 4005        | 34.28                                          | 43.78        | 22.96        | 13.80        | 13.91        |
| 4006        | 33.94                                          | 38.14        | 23.09        | 15.73        | 23.30        |
| <b>Mean</b> | <b>33.08</b>                                   | <b>40.55</b> | <b>26.67</b> | <b>20.36</b> | <b>18.61</b> |
| <b>SD</b>   | <b>7.93</b>                                    | <b>8.06</b>  | <b>10.24</b> | <b>10.71</b> | <b>6.64</b>  |

**Table 5 Summary of Immunophenotyping Results-Monkey Blood (CD45+CD3+, Total T Cells)**

| Animal No.  | Subpopulation percent (%) for T/B Panel (Female) |              |              |              |              |
|-------------|--------------------------------------------------|--------------|--------------|--------------|--------------|
|             | Pretest                                          | Day 1 2~4h   | Day 88       | Day 178      | Day 211      |
| 1501        | 58.85                                            | 46.12        | 67.53        | 63.79        | NA           |
| 1502        | 70.24                                            | 61.75        | 71.01        | 74.49        | NA           |
| 1503        | 71.36                                            | 69.94        | 72.24        | 77.39        | NA           |
| 1504        | 64.03                                            | 53.01        | 61.77        | 63.32        | NA           |
| 1505        | 55.22                                            | 50.61        | 55.89        | 62.53        | 58.22        |
| 1506        | 74.81                                            | 69.00        | 67.78        | 63.32        | 67.47        |
| <b>Mean</b> | <b>65.75</b>                                     | <b>58.41</b> | <b>66.04</b> | <b>67.47</b> | <b>62.85</b> |
| <b>SD</b>   | <b>7.68</b>                                      | <b>9.97</b>  | <b>6.16</b>  | <b>6.63</b>  | <b>6.54</b>  |
| 2501        | 66.67                                            | 62.84        | 67.49        | 69.78        | NA           |
| 2502        | 65.55                                            | 53.64        | 73.41        | 73.36        | NA           |
| 2503        | 60.44                                            | 49.13        | 55.40        | 62.36        | NA           |
| 2504        | 63.69                                            | 58.10        | 67.91        | 63.48        | NA           |
| 2505        | 60.55                                            | 46.25        | 62.99        | 65.41        | 65.44        |
| 2506        | 56.24                                            | 43.88        | 52.99        | 50.78        | 59.40        |
| <b>Mean</b> | <b>62.19</b>                                     | <b>52.31</b> | <b>63.37</b> | <b>64.20</b> | <b>62.42</b> |
| <b>SD</b>   | <b>3.87</b>                                      | <b>7.27</b>  | <b>7.87</b>  | <b>7.75</b>  | <b>4.27</b>  |
| 3501        | 59.94                                            | 54.33        | 51.08        | 56.24        | NA           |
| 3502        | 71.57                                            | 67.43        | 68.57        | 64.95        | NA           |
| 3503        | 68.78                                            | 65.62        | 68.47        | 72.46        | NA           |
| 3504        | 54.63                                            | 53.36        | 61.10        | 66.15        | NA           |
| 3505        | 57.65                                            | 54.83        | 67.89        | 73.86        | 58.06        |
| 3506        | 60.38                                            | 54.05        | 59.48        | 62.19        | 68.63        |
| <b>Mean</b> | <b>62.16</b>                                     | <b>58.27</b> | <b>62.77</b> | <b>65.98</b> | <b>63.35</b> |
| <b>SD</b>   | <b>6.60</b>                                      | <b>6.44</b>  | <b>6.97</b>  | <b>6.55</b>  | <b>7.47</b>  |
| 4501        | 51.89                                            | 45.08        | 61.25        | 60.23        | NA           |
| 4502        | 58.94                                            | 55.33        | 60.85        | 64.94        | NA           |
| 4503        | 73.11                                            | 75.20        | 69.81        | 74.83        | NA           |
| 4504        | 65.85                                            | 65.47        | 68.85        | 73.59        | NA           |
| 4505        | 62.28                                            | 61.70        | 53.97        | 71.98        | 71.88        |
| 4506        | 73.01                                            | 67.96        | 77.52        | 82.82        | 84.25        |
| <b>Mean</b> | <b>64.18</b>                                     | <b>61.79</b> | <b>65.38</b> | <b>71.40</b> | <b>78.07</b> |
| <b>SD</b>   | <b>8.28</b>                                      | <b>10.51</b> | <b>8.33</b>  | <b>7.92</b>  | <b>8.75</b>  |

**Table 6 Summary of Immunophenotyping Results-Monkey Blood  
(CD45+CD3+CD4+CD8-, Helper T Cells)**

| Animal No.  | Subpopulation percent (%) for T/B Panel (Female) |              |              |              |              |
|-------------|--------------------------------------------------|--------------|--------------|--------------|--------------|
|             | Pretest                                          | Day 1 2~4h   | Day 88       | Day 178      | Day 211      |
| 1501        | 32.32                                            | 25.33        | 37.50        | 35.04        | NA           |
| 1502        | 46.83                                            | 40.88        | 44.70        | 46.76        | NA           |
| 1503        | 45.20                                            | 47.48        | 44.09        | 49.57        | NA           |
| 1504        | 30.02                                            | 24.13        | 34.70        | 36.05        | NA           |
| 1505        | 36.52                                            | 34.59        | 35.77        | 40.41        | 37.76        |
| 1506        | 39.88                                            | 42.25        | 26.86        | 28.15        | 31.40        |
| <b>Mean</b> | <b>38.46</b>                                     | <b>35.78</b> | <b>37.27</b> | <b>39.33</b> | <b>34.58</b> |
| <b>SD</b>   | <b>6.79</b>                                      | <b>9.50</b>  | <b>6.62</b>  | <b>7.94</b>  | <b>4.50</b>  |
| 2501        | 31.42                                            | 31.24        | 31.61        | 32.94        | NA           |
| 2502        | 36.64                                            | 33.27        | 33.04        | 31.33        | NA           |
| 2503        | 36.92                                            | 29.90        | 31.64        | 37.75        | NA           |
| 2504        | 38.63                                            | 35.88        | 41.09        | 39.00        | NA           |
| 2505        | 39.25                                            | 30.30        | 39.10        | 39.01        | 39.54        |
| 2506        | 32.59                                            | 26.08        | 29.10        | 21.27        | 29.15        |
| <b>Mean</b> | <b>35.91</b>                                     | <b>31.11</b> | <b>34.26</b> | <b>33.55</b> | <b>34.35</b> |
| <b>SD</b>   | <b>3.20</b>                                      | <b>3.31</b>  | <b>4.73</b>  | <b>6.83</b>  | <b>7.35</b>  |
| 3501        | 28.77                                            | 28.39        | 26.41        | 30.06        | NA           |
| 3502        | 45.59                                            | 43.37        | 42.42        | 42.22        | NA           |
| 3503        | 34.96                                            | 36.43        | 37.33        | 37.33        | NA           |
| 3504        | 27.29                                            | 28.07        | 28.93        | 30.81        | NA           |
| 3505        | 39.90                                            | 38.54        | 34.47        | 48.82        | 34.27        |
| 3506        | 38.77                                            | 35.39        | 37.98        | 36.23        | 40.31        |
| <b>Mean</b> | <b>35.88</b>                                     | <b>35.03</b> | <b>34.59</b> | <b>37.58</b> | <b>37.29</b> |
| <b>SD</b>   | <b>6.99</b>                                      | <b>5.94</b>  | <b>5.99</b>  | <b>7.10</b>  | <b>4.27</b>  |
| 4501        | 30.76                                            | 27.58        | 38.54        | 35.99        | NA           |
| 4502        | 26.28                                            | 26.97        | 24.03        | 24.47        | NA           |
| 4503        | 45.32                                            | 49.01        | 42.13        | 44.51        | NA           |
| 4504        | 37.46                                            | 38.58        | 40.41        | 41.03        | NA           |
| 4505        | 34.16                                            | 33.08        | 33.50        | 38.17        | 36.80        |
| 4506        | 46.18                                            | 42.30        | 49.17        | 49.14        | 46.54        |
| <b>Mean</b> | <b>36.69</b>                                     | <b>36.25</b> | <b>37.96</b> | <b>38.89</b> | <b>41.67</b> |
| <b>SD</b>   | <b>7.94</b>                                      | <b>8.67</b>  | <b>8.52</b>  | <b>8.46</b>  | <b>6.89</b>  |

**Table 7 Summary of Immunophenotyping Results-Monkey Blood  
(CD45+CD3+CD4-CD8+, Cytotoxic T Cells)**

| Animal No.  | Subpopulation percent (%) for T/B Panel (Female) |              |              |              |              |
|-------------|--------------------------------------------------|--------------|--------------|--------------|--------------|
|             | Pretest                                          | Day 1 2~4h   | Day 88       | Day 178      | Day 211      |
| 1501        | 22.57                                            | 16.51        | 25.89        | 24.33        | NA           |
| 1502        | 18.84                                            | 15.70        | 20.60        | 21.17        | NA           |
| 1503        | 23.59                                            | 19.63        | 25.52        | 24.79        | NA           |
| 1504        | 30.27                                            | 24.86        | 23.37        | 23.84        | NA           |
| 1505        | 15.38                                            | 12.53        | 16.39        | 18.52        | 16.75        |
| 1506        | 29.35                                            | 20.71        | 35.36        | 29.92        | 30.23        |
| <b>Mean</b> | <b>23.33</b>                                     | <b>18.32</b> | <b>24.52</b> | <b>23.76</b> | <b>23.49</b> |
| <b>SD</b>   | <b>5.80</b>                                      | <b>4.33</b>  | <b>6.37</b>  | <b>3.83</b>  | <b>9.53</b>  |
| 2501        | 31.74                                            | 27.87        | 31.71        | 30.35        | NA           |
| 2502        | 26.44                                            | 17.73        | 37.81        | 38.25        | NA           |
| 2503        | 19.85                                            | 14.92        | 19.96        | 20.00        | NA           |
| 2504        | 22.39                                            | 19.36        | 23.89        | 21.82        | NA           |
| 2505        | 17.15                                            | 12.05        | 19.41        | 21.27        | 21.40        |
| 2506        | 20.93                                            | 15.04        | 19.17        | 26.11        | 26.44        |
| <b>Mean</b> | <b>23.08</b>                                     | <b>17.83</b> | <b>25.33</b> | <b>26.30</b> | <b>23.92</b> |
| <b>SD</b>   | <b>5.23</b>                                      | <b>5.53</b>  | <b>7.75</b>  | <b>6.99</b>  | <b>3.56</b>  |
| 3501        | 26.35                                            | 21.11        | 20.15        | 21.24        | NA           |
| 3502        | 22.02                                            | 19.86        | 22.04        | 18.75        | NA           |
| 3503        | 30.52                                            | 25.78        | 27.47        | 31.25        | NA           |
| 3504        | 24.38                                            | 22.28        | 29.33        | 32.76        | NA           |
| 3505        | 14.77                                            | 12.76        | 30.37        | 22.47        | 21.11        |
| 3506        | 18.54                                            | 15.03        | 18.99        | 23.06        | 25.46        |
| <b>Mean</b> | <b>22.76</b>                                     | <b>19.47</b> | <b>24.73</b> | <b>24.92</b> | <b>23.29</b> |
| <b>SD</b>   | <b>5.62</b>                                      | <b>4.80</b>  | <b>4.93</b>  | <b>5.70</b>  | <b>3.08</b>  |
| 4501        | 17.32                                            | 14.48        | 19.97        | 21.46        | NA           |
| 4502        | 25.16                                            | 21.73        | 26.94        | 29.79        | NA           |
| 4503        | 22.84                                            | 21.19        | 23.70        | 25.25        | NA           |
| 4504        | 24.18                                            | 22.85        | 24.63        | 27.62        | NA           |
| 4505        | 24.88                                            | 25.17        | 17.07        | 29.92        | 31.64        |
| 4506        | 19.59                                            | 18.31        | 22.23        | 25.08        | 28.67        |
| <b>Mean</b> | <b>22.33</b>                                     | <b>20.62</b> | <b>22.42</b> | <b>26.52</b> | <b>30.16</b> |
| <b>SD</b>   | <b>3.19</b>                                      | <b>3.75</b>  | <b>3.51</b>  | <b>3.25</b>  | <b>2.10</b>  |

**Table 8 Summary of Immunophenotyping Results-Monkey Blood  
(CD45+CD3-CD20+, B Cells)**

| Animal No.  | Subpopulation percent (%) for T/B Panel (Female) |              |              |              |              |
|-------------|--------------------------------------------------|--------------|--------------|--------------|--------------|
|             | Pretest                                          | Day 1 2~4h   | Day 88       | Day 178      | Day 211      |
| 1501        | 28.96                                            | 39.90        | 18.35        | 16.22        | NA           |
| 1502        | 18.34                                            | 24.24        | 15.33        | 15.66        | NA           |
| 1503        | 20.73                                            | 19.61        | 19.41        | 16.45        | NA           |
| 1504        | 22.97                                            | 29.85        | 18.54        | 14.17        | NA           |
| 1505        | 26.42                                            | 32.66        | 29.61        | 17.99        | 19.77        |
| 1506        | 18.01                                            | 21.94        | 19.24        | 32.26        | 28.94        |
| <b>Mean</b> | <b>22.57</b>                                     | <b>28.03</b> | <b>20.08</b> | <b>18.79</b> | <b>24.36</b> |
| <b>SD</b>   | <b>4.42</b>                                      | <b>7.59</b>  | <b>4.90</b>  | <b>6.71</b>  | <b>6.48</b>  |
| 2501        | 21.59                                            | 25.53        | 18.52        | 13.72        | NA           |
| 2502        | 28.01                                            | 34.34        | 17.78        | 14.08        | NA           |
| 2503        | 29.92                                            | 44.34        | 26.14        | 22.93        | NA           |
| 2504        | 22.80                                            | 27.67        | 15.27        | 8.99         | NA           |
| 2505        | 32.90                                            | 43.04        | 24.11        | 18.50        | 20.37        |
| 2506        | 26.88                                            | 35.81        | 28.57        | 32.76        | 26.70        |
| <b>Mean</b> | <b>27.02</b>                                     | <b>35.12</b> | <b>21.73</b> | <b>18.50</b> | <b>23.54</b> |
| <b>SD</b>   | <b>4.27</b>                                      | <b>7.70</b>  | <b>5.28</b>  | <b>8.44</b>  | <b>4.48</b>  |
| 3501        | 28.12                                            | 37.16        | 45.26        | 37.45        | NA           |
| 3502        | 18.93                                            | 27.91        | 22.71        | 32.23        | NA           |
| 3503        | 23.20                                            | 28.48        | 21.80        | 17.35        | NA           |
| 3504        | 33.48                                            | 37.07        | 26.55        | 24.17        | NA           |
| 3505        | 32.78                                            | 33.26        | 27.16        | 11.89        | 12.77        |
| 3506        | 28.07                                            | 34.47        | 18.53        | 27.43        | 22.50        |
| <b>Mean</b> | <b>27.43</b>                                     | <b>33.06</b> | <b>27.00</b> | <b>25.09</b> | <b>17.64</b> |
| <b>SD</b>   | <b>5.59</b>                                      | <b>4.06</b>  | <b>9.50</b>  | <b>9.43</b>  | <b>6.88</b>  |
| 4501        | 41.34                                            | 51.03        | 29.84        | 31.81        | NA           |
| 4502        | 31.28                                            | 36.76        | 24.19        | 18.84        | NA           |
| 4503        | 11.02                                            | 14.83        | 10.02        | 9.42         | NA           |
| 4504        | 22.27                                            | 22.83        | 22.71        | 17.60        | NA           |
| 4505        | 34.63                                            | 35.18        | 34.83        | 24.13        | 22.68        |
| 4506        | 24.34                                            | 29.97        | 20.11        | 13.31        | 13.33        |
| <b>Mean</b> | <b>27.48</b>                                     | <b>31.77</b> | <b>23.62</b> | <b>19.19</b> | <b>18.01</b> |
| <b>SD</b>   | <b>10.64</b>                                     | <b>12.47</b> | <b>8.52</b>  | <b>7.95</b>  | <b>6.61</b>  |

**Table 25 Summary of cytokine results-monkey serum**

| Animal No. | Cytokine Conc.(pg/mL), Pretest Male |       |       |       |       |       |       |       |
|------------|-------------------------------------|-------|-------|-------|-------|-------|-------|-------|
|            | IL-2                                | IL-5  | IL-6  | IL-10 | IL-13 | TNF-a | IFN-r | IL-4  |
| 1001       | <2.90                               | <2.70 | 8.80  | <8.36 | <2.63 | <2.31 | <2.67 | <1.98 |
| 1002       | 49.99                               | <2.70 | 10.52 | <8.36 | <2.63 | <2.31 | <2.67 | <1.98 |
| 1003       | <2.90                               | <2.70 | 2.83  | <8.36 | <2.63 | <2.31 | <2.67 | <1.98 |
| 1004       | <2.90                               | <2.70 | <2.61 | <8.36 | <2.63 | <2.31 | <2.67 | <1.98 |
| 1005       | <2.90                               | <2.70 | <2.61 | <8.36 | <2.63 | <2.31 | <2.67 | <1.98 |
| 1006       | <2.90                               | <2.70 | <2.61 | <8.36 | <2.63 | <2.31 | <2.67 | <1.98 |
| Mean       | Ncal                                | Ncal  | Ncal  | Ncal  | Ncal  | Ncal  | Ncal  | Ncal  |
| SD         | Ncal                                | Ncal  | Ncal  | Ncal  | Ncal  | Ncal  | Ncal  | Ncal  |
| 2001       | <2.90                               | <2.70 | <2.61 | <8.36 | <2.63 | <2.31 | <2.67 | <1.98 |
| 2002       | 14.20                               | <2.70 | <2.61 | 48.43 | 3.07  | 3.26  | 50.09 | 12.47 |
| 2003       | <2.90                               | <2.70 | <2.61 | 79.31 | <2.63 | 6.86  | 36.05 | 10.48 |
| 2004       | <2.90                               | <2.70 | 23.86 | 13.12 | <2.63 | <2.31 | <2.67 | <1.98 |
| 2005       | <2.90                               | <2.70 | <2.61 | <8.36 | <2.63 | <2.31 | <2.67 | <1.98 |
| 2006       | <2.90                               | <2.70 | <2.61 | <8.36 | <2.63 | <2.31 | <2.67 | <1.98 |
| Mean       | Ncal                                | Ncal  | Ncal  | Ncal  | Ncal  | Ncal  | Ncal  | Ncal  |
| SD         | Ncal                                | Ncal  | Ncal  | Ncal  | Ncal  | Ncal  | Ncal  | Ncal  |
| 3001       | <2.90                               | <2.70 | 10.66 | <8.36 | <2.63 | <2.31 | <2.67 | <1.98 |
| 3002       | <2.90                               | <2.70 | <2.61 | <8.36 | <2.63 | <2.31 | <2.67 | <1.98 |
| 3003       | <2.90                               | <2.70 | <2.61 | <8.36 | <2.63 | <2.31 | <2.67 | <1.98 |
| 3004       | <2.90                               | <2.70 | <2.61 | <8.36 | <2.63 | <2.31 | <2.67 | <1.98 |
| 3005       | <2.90                               | <2.70 | <2.61 | <8.36 | <2.63 | <2.31 | <2.67 | <1.98 |
| 3006       | <2.90                               | 3.49  | 9.32  | <8.36 | <2.63 | <2.31 | <2.67 | <1.98 |
| Mean       | Ncal                                | Ncal  | Ncal  | Ncal  | Ncal  | Ncal  | Ncal  | Ncal  |
| SD         | Ncal                                | Ncal  | Ncal  | Ncal  | Ncal  | Ncal  | Ncal  | Ncal  |
| 4001       | <2.90                               | <2.70 | <2.61 | <8.36 | <2.63 | <2.31 | <2.67 | <1.98 |
| 4002       | <2.90                               | <2.70 | <2.61 | <8.36 | <2.63 | <2.31 | <2.67 | <1.98 |
| 4003       | <2.90                               | <2.70 | <2.61 | <8.36 | <2.63 | <2.31 | <2.67 | <1.98 |
| 4004       | <2.90                               | <2.70 | <2.61 | <8.36 | 4.86  | <2.31 | <2.67 | <1.98 |
| 4005       | <2.90                               | <2.70 | <2.61 | <8.36 | <2.63 | <2.31 | <2.67 | <1.98 |
| 4006       | <2.90                               | <2.70 | <2.61 | <8.36 | <2.63 | <2.31 | <2.67 | <1.98 |
| Mean       | Ncal                                | Ncal  | Ncal  | Ncal  | Ncal  | Ncal  | Ncal  | Ncal  |
| SD         | Ncal                                | Ncal  | Ncal  | Ncal  | Ncal  | Ncal  | Ncal  | Ncal  |

NcalN: Curve fitting failed; N/A: Data marked out; ND: Missing original data

**Table 26 Summary of cytokine results-monkey serum**

| Cytokine Conc.(pg/mL), Pretest Female |       |       |       |       |       |       |       |       |
|---------------------------------------|-------|-------|-------|-------|-------|-------|-------|-------|
| Animal No.                            | IL-2  | IL-5  | IL-6  | IL-10 | IL-13 | TNF-a | IFN-r | IL-4  |
| 1501                                  | <2.90 | <2.70 | 8.80  | <8.36 | <2.63 | <2.31 | <2.67 | <1.98 |
| 1502                                  | 49.99 | <2.70 | 10.52 | <8.36 | <2.63 | <2.31 | <2.67 | <1.98 |
| 1503                                  | <2.90 | <2.70 | 2.83  | <8.36 | <2.63 | <2.31 | <2.67 | <1.98 |
| 1504                                  | <2.90 | <2.70 | <2.61 | <8.36 | <2.63 | <2.31 | <2.67 | <1.98 |
| 1505                                  | <2.90 | <2.70 | <2.61 | <8.36 | <2.63 | <2.31 | <2.67 | <1.98 |
| 1506                                  | <2.90 | <2.70 | <2.61 | <8.36 | <2.63 | <2.31 | <2.67 | <1.98 |
| Mean                                  | Ncal  | Ncal  | Ncal  | Ncal  | Ncal  | Ncal  | Ncal  | Ncal  |
| SD                                    | Ncal  | Ncal  | Ncal  | Ncal  | Ncal  | Ncal  | Ncal  | Ncal  |
| 2501                                  | <2.90 | <2.70 | <2.61 | <8.36 | <2.63 | <2.31 | <2.67 | <1.98 |
| 2502                                  | 14.20 | <2.70 | <2.61 | 48.43 | 3.07  | 3.26  | 50.09 | 12.47 |
| 2503                                  | <2.90 | <2.70 | <2.61 | 79.31 | <2.63 | 6.86  | 36.05 | 10.48 |
| 2504                                  | <2.90 | <2.70 | 23.86 | 13.12 | <2.63 | <2.31 | <2.67 | <1.98 |
| 2505                                  | <2.90 | <2.70 | <2.61 | <8.36 | <2.63 | <2.31 | <2.67 | <1.98 |
| 2506                                  | <2.90 | <2.70 | <2.61 | <8.36 | <2.63 | <2.31 | <2.67 | <1.98 |
| Mean                                  | Ncal  | Ncal  | Ncal  | Ncal  | Ncal  | Ncal  | Ncal  | Ncal  |
| SD                                    | Ncal  | Ncal  | Ncal  | Ncal  | Ncal  | Ncal  | Ncal  | Ncal  |
| 3501                                  | <2.90 | <2.70 | 10.66 | <8.36 | <2.63 | <2.31 | <2.67 | <1.98 |
| 3502                                  | <2.90 | <2.70 | <2.61 | <8.36 | <2.63 | <2.31 | <2.67 | <1.98 |
| 3503                                  | <2.90 | <2.70 | <2.61 | <8.36 | <2.63 | <2.31 | <2.67 | <1.98 |
| 3504                                  | <2.90 | <2.70 | <2.61 | <8.36 | <2.63 | <2.31 | <2.67 | <1.98 |
| 3505                                  | <2.90 | <2.70 | <2.61 | <8.36 | <2.63 | <2.31 | <2.67 | <1.98 |
| 3506                                  | <2.90 | 3.49  | 9.32  | <8.36 | <2.63 | <2.31 | <2.67 | <1.98 |
| Mean                                  | Ncal  | Ncal  | Ncal  | Ncal  | Ncal  | Ncal  | Ncal  | Ncal  |
| SD                                    | Ncal  | Ncal  | Ncal  | Ncal  | Ncal  | Ncal  | Ncal  | Ncal  |
| 4501                                  | <2.90 | <2.70 | <2.61 | <8.36 | <2.63 | <2.31 | <2.67 | <1.98 |
| 4502                                  | <2.90 | <2.70 | <2.61 | <8.36 | <2.63 | <2.31 | <2.67 | <1.98 |
| 4503                                  | <2.90 | <2.70 | <2.61 | <8.36 | <2.63 | <2.31 | <2.67 | <1.98 |
| 4504                                  | <2.90 | <2.70 | <2.61 | <8.36 | 4.86  | <2.31 | <2.67 | <1.98 |
| 4505                                  | <2.90 | <2.70 | <2.61 | <8.36 | <2.63 | <2.31 | <2.67 | <1.98 |
| 4506                                  | <2.90 | <2.70 | <2.61 | <8.36 | <2.63 | <2.31 | <2.67 | <1.98 |
| Mean                                  | Ncal  | Ncal  | Ncal  | Ncal  | Ncal  | Ncal  | Ncal  | Ncal  |
| SD                                    | Ncal  | Ncal  | Ncal  | Ncal  | Ncal  | Ncal  | Ncal  | Ncal  |

NcalN: Curve fitting failed; N/A: Data marked out; ND: Missing original data
